# Supplementary material for: Pancreatic cancer-initiating cell exosome message transfer into noncancer-initiating cells: the importance of CD44v6 in reprogramming
Source: PubMed Central journal article supplement (PMC6425561; doi:10.1186/s13046-019-1129-8), 2019-03-19
Supplement: 13046_2019_1129_MOESM1_ESM.pdf [file 13046_2019_1129_MOESM1_ESM.pdf]

## Additional file

### Pancreatic cancer-initiating cell exosome message transfer into noncancer-initiating cells: The importance of CD44v6 in reprogramming

Zhe Wang<sup>1,2</sup>, Hanxue Sun<sup>2</sup>, Jan Provaznik<sup>3</sup>, Thilo Hackert<sup>2</sup>, Margot Zöller<sup>1,2,\*</sup>

<sup>1</sup> Department of Oncology, The First Affiliated Hospital of Guangdong Pharmaceutical University, Guangzhou, China, <sup>2</sup> Pancreas Section, University Hospital of Surgery, Heidelberg, Germany, <sup>3</sup> Gene Core Unit, EMBL Heidelberg, Germany

|           |                                                                                                                                                                                    |
|-----------|------------------------------------------------------------------------------------------------------------------------------------------------------------------------------------|
| Table S1  | Alphabetic list of gene symbols                                                                                                                                                    |
| Table S2  | Antibodies, reagents, primers                                                                                                                                                      |
| Table S3  | The impact of CIC-TEX on mRNA recovery in CD44v6kd and Tspan8k cells                                                                                                               |
| Table S4  | The impact of CIC-TEX on miRNA recovery in CD44v6kd and Tspan8k cells                                                                                                              |
| Table S5  | Correlation between upregulated miRNA and downregulated mRNA                                                                                                                       |
| Figure S1 | TEX characterization and in vivo distribution of CIC-TEX                                                                                                                           |
| Figure S2 | Differences in the mRNA profile of A818.4, -CD44v6kd and -Tspan8kd cells and TEX and the impact of CIC-TEX on CD44v6kd and Tspan8kd cells                                          |
| Figure S3 | Distinct miRNA recovery in wt-TEX versus CD44v6kd and Tspan8kd TEX and in kd cells cocultured with CIC-TEX                                                                         |
| Figure S4 | CIC-TEX-initiated changes in RTK and downstream signaling molecules in Tspan8kd cells and mRNA release from repression by reduced miRNA expression in CD44v6kd and/or Tsp8kd cells |
| Figure S5 | CIC-TEX-promoted changed miRNA recovery and predicted target mRNA engaged in apoptosis                                                                                             |

Table S1

**Alphabetic list of gene symbols**

| <b>Gene symbol</b> | <b>Gene Name</b>                                                                     |
|--------------------|--------------------------------------------------------------------------------------|
| ABCA3, C3, C4, E1  | ATP binding cassette subfamily A member 3, C member 3/4, E member 1                  |
| ABCG2              | ATP binding cassette subfamily G member 2                                            |
| ACP2               | acid phosphatase 2, lysosomal                                                        |
| ACSS2              | acyl-CoA synthetase short-chain family member 2                                      |
| ADAM19             | ADAM metalloproteinase with thrombospondin type 1 motif 19                           |
| ADAMTS8            | ADAM metalloproteinase with thrombospondin type 1 motif 8                            |
| ADAMTSL2           | ADAMTS like 2                                                                        |
| ADGRE2             | adhesion G protein-coupled receptor E2                                               |
| ADGRG6             | adhesion G protein-coupled receptor G6                                               |
| ADGRL1             | adhesion G protein-coupled receptor L1                                               |
| AGTPBP1            | ATP/GTP binding protein 1                                                            |
| AKAP12             | A-kinase anchoring protein 12                                                        |
| AKNA               | AT-hook transcription factor                                                         |
| ALDH2              | aldehyde dehydrogenase 2                                                             |
| ALDH3A1            | aldehyde dehydrogenase 3 family member A1                                            |
| AMIGO2             | adhesion molecule with Ig like domain 2                                              |
| AMOT               | angiomin                                                                             |
| ANO1               | anoctamin 1                                                                          |
| ANTXR1             | anthrax toxin receptor 1                                                             |
| ANXA6              | annexin A6                                                                           |
| AP1AR              | adaptor related protein complex 1 associated regulatory protein                      |
| APCDD1             | APC down-regulated 1                                                                 |
| APOE               | apolipoprotein E                                                                     |
| AQP3               | aquaporin 3                                                                          |
| ARGLU1             | arginine and glutamate rich 1                                                        |
| ARHGAP1            | Rho GTPase activating protein 1                                                      |
| ARHGAP18           | Rho GTPase activating protein 18                                                     |
| ARHGEF40           | Rho guanine nucleotide exchange factor 40                                            |
| ARID5A             | AT-rich interaction domain 5A                                                        |
| ARL15              | ADP ribosylation factor like GTPase 15                                               |
| ARL5B              | ADP ribosylation factor like GTPase 5B                                               |
| ATF3               | activating transcription factor 3                                                    |
| ATP11A             | ATPase phospholipid transporting 11A                                                 |
| ATP13A3            | ATPase 13A3                                                                          |
| ATP6V0D1           | ATPase H <sup>+</sup> transporting V0 subunit d1                                     |
| ATP6V0E2           | ATPase H <sup>+</sup> transporting V0 subunit e2                                     |
| ATP6V1B1           | ATPase H <sup>+</sup> transporting V1 subunit B1                                     |
| AXIN2              | axin 2                                                                               |
| AZGP1              | alpha-2-glycoprotein 1, zinc-binding                                                 |
| BAMBI              | BMP and activin membrane bound inhibitor                                             |
| BAZ1A              | bromodomain adjacent to zinc finger domain 1A                                        |
| BCAS1              | breast carcinoma amplified sequence 1                                                |
| BCL2L15            | BCL2 like 15                                                                         |
| BDP1               | B double prime 1, subunit of RNA polymerase III transcription initiation factor IIIB |
| BHLHE40            | basic helix-loop-helix family member e40                                             |
| BIRC3              | baculoviral IAP repeat containing 3                                                  |
| BMI1               | BMI1 proto-oncogene, polycomb ring finger                                            |
| BRWD1              | bromodomain and WD repeat domain containing 1                                        |
| BST2               | bone marrow stromal cell antigen 2                                                   |
| BTAF1              | B-TFIID TATA-box binding protein associated factor 1                                 |
| BTBD6              | BTB domain containing 6                                                              |
| BTG1               | BTG anti-proliferation factor 1                                                      |
| BTG2               | BTG anti-proliferation factor 2                                                      |
| C6orf48            | chromosome 6 open reading frame 48                                                   |
| CACNA1D            | calcium voltage-gated channel subunit alpha1D                                        |
| CALHM3             | calcium homeostasis modulator 3                                                      |
| CAPN15             | calpain 15                                                                           |
| CAPRN2             | caprin family member 2                                                               |
| CAVIN3             | caveolae associated protein 3                                                        |
| CCDC3              | coiled-coil domain containing 3                                                      |
| CCDC69             | coiled-coil domain containing 69                                                     |
| CCND2              | cyclin D2                                                                            |
| CCNL1              | cyclin L1                                                                            |
| CCNT2              | cyclin T2                                                                            |
| CD164              | CD164 molecule / MUC-24                                                              |
| CD2AP              | CD2 associated protein                                                               |
| CD55               | CD55 molecule / DAF                                                                  |
| CDC42EP1           | CDC42 effector protein 1                                                             |
| CDH1               | cadherin 1, E-cadherin                                                               |
| CDH2               | cadherin 2, Ncad                                                                     |
| CDK5               | cyclin dependent kinase 5                                                            |
| CDK6               | cyclin dependent kinase 6                                                            |
| CDKN1A             | cyclin dependent kinase inhibitor 1A                                                 |
| CDKN2C             | cyclin dependent kinase inhibitor 2C                                                 |

Table S1 cont.

| <b>Symbol</b> | <b>Gene Name</b>                                                              |
|---------------|-------------------------------------------------------------------------------|
| CDX2          | caudal type homeobox 2                                                        |
| CEACAM1, 5, 6 | carcinoembryonic antigen related cell adhesion molecule 1, 5, 6               |
| CEBPG         | CCAAT/enhancer binding protein gamma                                          |
| CEMIP         | cell migration inducing hyaluronan binding protein                            |
| CEP290        | centrosomal protein 290                                                       |
| CHAC1         | ChaC glutathione specific gamma-glutamylcyclotransferase 1                    |
| CHI3L1        | chitinase 3 like 1                                                            |
| CHML          | CHM like, Rab escort protein 2                                                |
| CHMP2B        | charged multivesicular body protein 2B                                        |
| CHORDC1       | cysteine and histidine rich domain containing 1                               |
| CHRNA3, B1    | cholinergic receptor nicotinic alpha 3 subunit, beta 1 subunit                |
| CLASP2        | cytoplasmic linker associated protein 2                                       |
| CLDND1        | claudin 1                                                                     |
| CLEC3A        | C-type lectin domain family 3 member A                                        |
| CLK1          | CDC like kinase 1                                                             |
| CLU           | clusterin                                                                     |
| COG8          | component of oligomeric golgi complex 8                                       |
| COL17A1       | collagen type XVII alpha 1 chain                                              |
| COL6A1        | collagen type VI alpha 1                                                      |
| CPNE2         | copine 2                                                                      |
| CRAT          | carnitine O-acetyltransferase                                                 |
| CREB3L4       | cAMP responsive element binding protein 3 like 4                              |
| CREBZF        | CREB/ATF bZIP transcription factor                                            |
| CSNK1A1       | casein kinase 1 alpha 1                                                       |
| CST1, 3, Z    | cystatin SN, C, Z                                                             |
| CXCR4         | C-X-C motif chemokine receptor 4                                              |
| DBH           | dopamine beta-hydroxylase                                                     |
| DBI           | diazepam binding inhibitor, acyl-CoA binding protein                          |
| DCBLD2        | discoidin, CUB and LCCL domain containing 2                                   |
| DDAH2         | dimethylarginine dimethylaminohydrolase 2                                     |
| DDIT3, 4      | DNA damage inducible transcript 3, 4                                          |
| DDR1          | discoidin domain receptor tyrosine kinase 1                                   |
| DDX21,58, 60  | DEAD-box helicase 21, 58, 60                                                  |
| DGKE, H       | diacylglycerol kinase epsilon, eta                                            |
| DHCR24        | 24-dehydrocholesterol reductase                                               |
| DICER1        | dicer 1, ribonuclease III                                                     |
| DKK1, 4       | dickkopf WNT signaling pathway inhibitor 1, 4                                 |
| DNAH14        | dynein axonemal heavy chain 14                                                |
| DNASE1        | deoxyribonuclease I                                                           |
| DOCK6         | dedicator of cytokinesis 6                                                    |
| DST           | dystonin                                                                      |
| DUS4L         | dihydrouridine synthase 4 like                                                |
| DUSP5         | dual specificity phosphatase 5                                                |
| DVL1          | dishevelled segment polarity protein 1                                        |
| DYSF          | dysferlin                                                                     |
| EBP           | emopamil binding protein (sterol isomerase)                                   |
| EGFR          | epidermal growth factor receptor                                              |
| EGR1          | early growth response 1                                                       |
| EIF1AX        | eukaryotic translation initiation factor 1A, X-linked                         |
| EIF3J, 4A2    | eukaryotic translation initiation factor 3 subunit J, 4A2                     |
| EMP1          | epithelial membrane protein 1                                                 |
| ENAH          | enabled homolog                                                               |
| EPHA1, A4, B3 | EPH receptor A1, A4, B3 [24]                                                  |
| EPS15         | epidermal growth factor receptor pathway substrate 15                         |
| ERB2/ERB3     | ERB2 estrogen receptor beta 2, HER2 / ERB-B2 receptor tyrosine kinase 3, HER3 |
| EREG          | epiregulin                                                                    |
| ERMP1         | endoplasmic reticulum metalloproteinase 1                                     |
| ERRFI1        | ERBB receptor feedback inhibitor 1                                            |
| ESF1          | ESF1 nucleolar pre-rRNA processing protein homolog                            |
| F2R           | coagulation factor II thrombin receptor                                       |
| FAK           | protein tyrosine kinase 2, PTK2                                               |
| FAM129A, 135A | family with sequence similarity 129 member A, 135 member A                    |
| FAT1          | FAT atypical cadherin 1                                                       |
| FBXO2         | F-box protein 2                                                               |
| FBXW4         | F-box and WD repeat domain containing 4                                       |
| FERMT1        | fermitin family member 1                                                      |
| FGD3          | FYVE, RhoGEF and PH domain containing 3                                       |
| FGFR1,2,3,4   | fibroblast growth factor receptor 1, 2, 3, 4                                  |
| FHL1          | four and a half LIM domains 1                                                 |
| FLNA          | filamin A, B                                                                  |
| FLT3          | fms related tyrosine kinase 3                                                 |
| FMNL2         | formin like 2                                                                 |
| FOXP2         | forkhead box N2                                                               |
| FRMD5         | FERM domain containing 5                                                      |
| FSTL3         | follicle-stimulating hormone-like 3                                           |
| FUCA1         | fucosidase, alpha-L- 1, tissue                                                |
| FXYD6         | FXYD domain containing ion transport regulator 6                              |

Table S1 cont.

| Symbol            | Gene Name                                                         |
|-------------------|-------------------------------------------------------------------|
| GABRP             | gamma-aminobutyric acid type A receptor pi subunit                |
| GAL               | galanin and GMAP prepropeptide                                    |
| GAS5              | growth arrest specific 5 (non-protein coding)                     |
| GATA2             | GATA binding protein 2                                            |
| GATA2-AS1         | GATA2 antisense RNA1                                              |
| GBP2              | guanylate binding protein 2                                       |
| GCLC, M           | glutamate-cysteine ligase catalytic subunit, modifier subunit     |
| GCSAM             | germinal center associated signaling and motility                 |
| GDF15             | growth differentiation factor 15                                  |
| GEMIN5            | gem nuclear organelle associated protein 5                        |
| GFPT1             | glutamine--fructose-6-phosphate transaminase 1                    |
| GJB1              | gap junction protein beta 1                                       |
| GLUL              | glutamate-ammonia ligase                                          |
| GMFG              | glia maturation factor gamma                                      |
| GOLT1B            | golgi transport 1B                                                |
| GPD1L             | glycerol-3-phosphate dehydrogenase 1-like                         |
| GPR155            | G protein-coupled receptor 155                                    |
| GPRC5A            | G protein-coupled receptor class C group 5 member A               |
| GRB10             | growth factor receptor bound protein 10                           |
| GRM8              | glutamate metabotropic receptor 8                                 |
| GTF2F2            | general transcription factor IIF subunit 2                        |
| GYP A             | glycophorin A                                                     |
| H1F0              | H1 histone family member 0                                        |
| HELZ2             | helicase with zinc finger 2                                       |
| HES7              | hes family bHLH transcription factor 7                            |
| HMGA1             | high mobility group AT-hook 1                                     |
| HMGCR             | 3-hydroxy-3-methylglutaryl-CoA reductase                          |
| HMGCS1            | 3-hydroxy-3-methylglutaryl-CoA synthase 1                         |
| HOXA11, B7, B8    | homeobox A11, B7, B8                                              |
| HPGD              | 15-hydroxyprostaglandin dehydrogenase                             |
| HSPA1A, 1B        | heat shock protein family A (Hsp70) member 1A, 1B                 |
| HUNK              | hormonally up-regulated Neu-associated kinase                     |
| HYAL2             | hyaluronoglucosaminidase 2                                        |
| ID1               | inhibitor of DNA binding 1, HLH protein                           |
| IFI27             | interferon alpha inducible protein 27 like 2                      |
| IFI5              | interferon alpha inducible protein 6                              |
| IFI6              | interferon induced with helicase C domain 1                       |
| IFIH1             | interferon induced with helicase C domain 1                       |
| IFIT1, 2, 3       | interferon induced protein with tetratricopeptide repeats 1, 2, 3 |
| IFITM3            | interferon induced transmembrane protein 3                        |
| IGFBP6            | insulin like growth factor binding protein 6                      |
| IGF1R             | insulin like growth factor 1 receptor                             |
| IL17RD            | interleukin 17 receptor D                                         |
| IKBKB             | inhibitor of nuclear factor kappa B kinase, IKK $\beta$           |
| INHBE             | inhibin beta E subunit                                            |
| INSIG1            | insulin induced gene 1                                            |
| INSR              | insulin receptor                                                  |
| INTS5             | integrator complex subunit 5                                      |
| IPMK              | inositol polyphosphate multikinase                                |
| ISG15             | ISG15 ubiquitin-like modifier                                     |
| ITGA6, B1, B4     | integrin subunit alpha 6, beta 1, beta 4                          |
| ITK               | IL2 inducible T cell kinase                                       |
| JAG1, 2           | jagged 1, 2                                                       |
| JMY               | junction mediating and regulatory protein, p53 cofactor           |
| JPH1              | junctionophilin 1                                                 |
| JUN               | Jun proto-oncogene, AP-1 transcription factor subunit             |
| KAZALD1           | Kazal type serine peptidase inhibitor domain 1                    |
| KCNJ5             | potassium voltage-gated channel subfamily J member 5              |
| KCNQ1OT1          | KCNQ1 opposite strand/antisense transcript 1 (non-protein coding) |
| KIAA1804          | mixed lineage kinase 4                                            |
| KLHL17            | kelch like family member 17                                       |
| KLK1              | kallikrein 1                                                      |
| KLK10             | kallikrein related peptidase 10                                   |
| L1CAM             | L1 cell adhesion molecule                                         |
| LAMA3, A5, B3, C2 | laminin subunit alpha 3, alpha 5, beta 3, gamma 2                 |
| LCN2              | lipocalin 2                                                       |
| LCOR              | ligand dependent nuclear receptor corepressor                     |
| LDHA              | lactate dehydrogenase A                                           |
| LGALS1            | galectin 1                                                        |
| LIN7C             | lin-7 homolog C, crumbs cell polarity complex component           |
| LMO4              | LIM domain only 4                                                 |
| LONP1             | lon peptidase 1, mitochondrial                                    |
| LPR6              | LDL receptor related protein 6                                    |
| LSS               | lanosterol synthase (2,3-oxidosqualene-lanosterol cyclase)        |
| LUC7L3            | LUC7 like 3 pre-mRNA splicing factor                              |
| LYPLA1            | lysophospholipase I                                               |
| MAFK              | MAF bZIP transcription factor K                                   |

Table S1 cont.

| Symbol     | Gene Name                                                                                |
|------------|------------------------------------------------------------------------------------------|
| MAK16      | MAK16 homolog                                                                            |
| MAL2       | mal, T-cell differentiation protein 2 (gene/pseudogene)                                  |
| MALAT1     | metastasis associated lung adenocarcinoma transcript 1 (non-protein coding)              |
| MAPK       | mitogen-activated protein kinase                                                         |
| MAPK8IP3   | mitogen-activated protein kinase 8 interacting protein 3                                 |
| MBNL2      | muscleblind like splicing regulator 2                                                    |
| MBP        | myelin basic protein                                                                     |
| MBTPS2     | membrane bound transcription factor peptidase, site 2                                    |
| MCOLN3     | mucolipin 3                                                                              |
| MCSFR      | colony stimulating factor 1 receptor, CSF1R                                              |
| MCTP1      | multiple C2 and transmembrane domain containing 1                                        |
| MDN1       | midasin AAA ATPase 1                                                                     |
| MEIS2      | Meis homeobox 2                                                                          |
| MET        | MET proto-oncogene receptor tyrosine kinase                                              |
| MIB1       | mindbomb E3 ubiquitin protein ligase 1                                                   |
| MRPL12     | mitochondrial ribosomal protein L12                                                      |
| MSMO1      | methylsterol monooxygenase 1                                                             |
| MT-ND5     | NADH dehydrogenase, subunit 5 (complex I)                                                |
| MTSS1      | metastasis suppressor 1                                                                  |
| MVK        | mevalonate kinase                                                                        |
| MX1, 2     | MX dynamin like GTPase 1, 2                                                              |
| MXD1       | MAX dimerization protein 1                                                               |
| MXI1       | MAX interactor 1, dimerization protein                                                   |
| MYC        | v-myc avian myelocytomatosis viral oncogene homolog                                      |
| MYCL       | v-myc avian myelocytomatosis viral oncogene lung carc homolog, bHLH transcription factor |
| MYHB7      | myosin heavy chain 7B                                                                    |
| MYL6       | myosin light chain 6                                                                     |
| MYO10, 1D  | myosin X, 1D                                                                             |
| MYSM1      | Myb like, SWIRM and MPN domains 1                                                        |
| NAE1       | NEDD8 activating enzyme E1 subunit 1                                                     |
| NAMPT      | nicotinamide phosphoribosyltransferase                                                   |
| NANOG      | Nanog homeobox                                                                           |
| NCS1       | neuronal calcium sensor 1                                                                |
| NDRG1      | N-myc downstream regulated 1                                                             |
| NEAT1      | nuclear paraspeckle assembly transcript 1 (non-protein coding)                           |
| NEBL       | nebullette                                                                               |
| NEDD9      | neural precursor cell expressed, developmentally down-regulated 9                        |
| NEK6       | NIMA related kinase 6                                                                    |
| NEURL1B    | neuralized E3 ubiquitin protein ligase 1B                                                |
| NFATC4     | nuclear factor of activated T-cells 4                                                    |
| NFE2       | nuclear factor, erythroid 2                                                              |
| NFXL1      | nuclear transcription factor, X-box binding like 1                                       |
| NGFR       | nerve growth factor receptor                                                             |
| NKD1       | naked cuticle homolog 1                                                                  |
| NLN        | neurolysin                                                                               |
| NMD3       | NMD3 ribosome export adaptor                                                             |
| NOP58      | NOP58 ribonucleoprotein                                                                  |
| NOTCH1     | neurogenic locus notch homolog protein 1                                                 |
| NOTUM      | NOTUM, palmitoleoyl-protein carboxylesterase                                             |
| NOX1       | NADPH oxidase 1                                                                          |
| NPC2       | NPC intracellular cholesterol transporter 2                                              |
| NR1D1      | nuclear receptor subfamily 1 group D member 1                                            |
| NRP1       | neuropilin 1                                                                             |
| NTN1       | netrin 1                                                                                 |
| NTSR1      | neurotensin receptor 1 (high affinity)                                                   |
| OAS1, 2, 3 | 2'-5'-oligoadenylate synthetase 1, 2, 3                                                  |
| OASL       | 2'-5'-oligoadenylate synthetase like                                                     |
| OBSL1      | obscurin like 1                                                                          |
| OGT        | O-linked N-acetylglucosamine (GlcNAc) transferase                                        |
| ORAI3      | ORAI calcium release-activated calcium modulator 3                                       |
| OTUD3      | OTU deubiquitinase 3                                                                     |
| PABPC1L    | poly(A) binding protein cytoplasmic 1 like                                               |
| PAPD5      | PAP associated domain containing 5                                                       |
| PAQR3      | progesterin and adipoQ receptor family member 3                                          |
| PARD6B     | par-6 family cell polarity regulator beta                                                |
| PARM1      | prostate androgen-regulated mucin-like protein 1                                         |
| PARP10     | poly(ADP-ribose) polymerase family member 10                                             |
| PARP9      | poly(ADP-ribose) polymerase family member 9                                              |
| PAWR       | pro-apoptotic WT1 regulator                                                              |
| PAXB1      | PAX3 and PAX7 binding protein 1                                                          |
| PBXIP1     | PAX interacting protein 1                                                                |
| PCOLCE2    | procollagen C-endopeptidase enhancer 2                                                   |
| PCSK5      | proprotein convertase subtilisin/kexin type 5                                            |
| PCSK9      | proprotein convertase subtilisin/kexin type 9                                            |
| PDGFRB     | platelet derived growth factor receptor beta                                             |
| PER1       | period circadian clock 1                                                                 |
| PHLDA2, B2 | pleckstrin homology like domain family A member 2, B member 2                            |

Table S1 cont.

| <b>Symbol</b>    | <b>Gene Name</b>                                                                |
|------------------|---------------------------------------------------------------------------------|
| PIK3R3           | phosphoinositide-3-kinase regulatory subunit 3                                  |
| PIM1, 3          | Pim-1, 3 proto-oncogene, serine/threonine kinase                                |
| PKD1             | polycystin 1, transient receptor potential channel interacting                  |
| PKN2             | protein kinase N2                                                               |
| PLAUR            | plasminogen activator, urokinase receptor                                       |
| PLIN3            | perilipin 3                                                                     |
| PLSCR1           | phospholipid scramblase 1                                                       |
| PM20D2           | peptidase M20 domain containing 2                                               |
| PMAIP1           | phorbol-12-myristate-13-acetate-induced protein 1                               |
| PMEPA1           | prostate transmembrane protein, androgen induced 1                              |
| PNN              | pinin, desmosome associated protein                                             |
| POLR1D           | RNA polymerase I subunit D                                                      |
| POLR3E, 3G       | RNA polymerase III subunit E, G                                                 |
| PPARD            | peroxisome proliferator activated receptor delta                                |
| PPP3CA           | protein phosphatase 3 catalytic subunit alpha                                   |
| PRDX2            | peroxiredoxin 2                                                                 |
| PRICKLE4         | prickle planar cell polarity protein 4                                          |
| PRKCBDBP         | protein kinase C delta binding protein                                          |
| PRPF39           | pre-mRNA processing factor 39                                                   |
| PRR5L            | proline rich 5 like                                                             |
| PRSS23, 3        | serine protease 23, 3                                                           |
| PSD3             | pleckstrin and Sec7 domain containing 3                                         |
| PSMB9            | proteasome subunit beta 9                                                       |
| PTPN11, 2        | protein tyrosine phosphatase, non-receptor type 11, 2                           |
| PUM3             | pumilio RNA binding family member 3                                             |
| PUS7             | pseudouridylate synthase 7 (putative)                                           |
| PVR              | poliovirus receptor                                                             |
| RAB12, 15, 42    | RAB12,15, 42 member RAS oncogene family                                         |
| RABGGTB          | Rab geranylgeranyltransferase beta subunit                                      |
| RARRS1, 3        | retinoic acid receptor responder 1, 3                                           |
| RASL11A, 11B     | RAS like family 11 member A, B                                                  |
| RBM26, 39        | RNA binding motif protein 26, 39                                                |
| REEP2            | receptor accessory protein 2                                                    |
| RET              | ret proto-oncogene                                                              |
| RGS2             | regulator of G-protein signaling 2                                              |
| RHBDL2           | rhomboid like 2                                                                 |
| RHPN1            | rhopilin Rho GTPase binding protein 1                                           |
| RICTOR           | RPTOR independent companion of MTOR complex 2                                   |
| RIDA             | reactive intermediate imine deaminase A homolog                                 |
| RIF1             | replication timing regulatory factor 1                                          |
| RON              | macrophage stimulating 1 receptor, MST1R, CD136                                 |
| RPL32P3          | ribosomal protein L32 pseudogene 3                                              |
| S100A13          | S100 calcium binding protein A13                                                |
| SAMHD1           | SAM and HD domain containing deoxynucleoside triphosphate triphosphohydrolase 1 |
| SASS6            | SAS-6 centriolar assembly protein                                               |
| SAT1             | spermidine/spermine N1-acetyltransferase 1                                      |
| SCAMP1           | secretory carrier membrane protein 1                                            |
| SCD              | stearoyl-CoA desaturase                                                         |
| SCEL             | sciellin                                                                        |
| SCML1            | sex comb on midleg-like 1 (Drosophila)                                          |
| SCNN1A           | sodium channel epithelial 1 alpha subunit                                       |
| SDC4             | syndecan 4                                                                      |
| SEC14L2          | SEC14 like lipid binding 2                                                      |
| SERPINA2, E1, E2 | serpin family A member 2, E member 1, 2                                         |
| SFN              | stratifin                                                                       |
| SHROOM1          | shroom family member 1                                                          |
| SHTN1            | shootin 1                                                                       |
| SIK1             | siah E3 ubiquitin protein ligase 2                                              |
| SLC12A4          | solute carrier family 12 member 4                                               |
| SLC19A2          | solute carrier family 19 member 2                                               |
| SLC1A4           | solute carrier family 1 member 4                                                |
| SLC20A1          | solute carrier family 20 member 1                                               |
| SLC22A3          | solute carrier family 22 member A3                                              |
| SLC25A1          | solute carrier family 25 member 1                                               |
| SLC25A36         | solute carrier family 25 member 36                                              |
| SLC25A37         | solute carrier family 25 member 37                                              |
| SLC2A6           | solute carrier family 2 member 6                                                |
| SLC35A3          | solute carrier family 35 member A3                                              |
| SLC35D1          | solute carrier family 35 member D1                                              |
| SLC35F2          | solute carrier family 35 member F2                                              |
| SLC38A11         | solute carrier family 38 member 11                                              |
| SLC3A2           | solute carrier family 3 member 2                                                |
| SLC40A1          | solute carrier family 40 member 1                                               |
| SLC4A4           | solute carrier family 4 member 4                                                |
| SLC4A7           | solute carrier family 4 member 7                                                |
| SLC4A8           | solute carrier family 4 member 8                                                |
| SLC5A1           | solute carrier family 5 member 1                                                |

Table S1 cont.

| <b>Symbol</b>     | <b>Gene Name</b>                                                       |
|-------------------|------------------------------------------------------------------------|
| SLC7A11           | solute carrier family 7 member 11                                      |
| SLC7A2            | solute carrier family 7 member 2                                       |
| SLC7A8            | solute carrier family 7 member 8                                       |
| SLCO4A1           | solute carrier organic anion transporter family member 4A1             |
| SLMAP             | sarcolemma associated protein                                          |
| SNHG1, 15, 17     | small nucleolar RNA host gene 1, 15, 17                                |
| SORT1             | sortilin 1                                                             |
| SP5               | Sp5 transcription factor                                               |
| SPCS3             | signal peptidase complex subunit 3                                     |
| SPINK1            | serine peptidase inhibitor, Kazal type 1                               |
| SPIRE1            | spire type actin nucleation factor 1                                   |
| SPNS2             | sphingolipid transporter 2                                             |
| SPRY1,2,3,4       | sprouty RTK signaling antagonist 1, 2, 3, 4                            |
| SPTB              | spectrin beta, erythrocytic                                            |
| SPTBN2            | spectrin beta, non-erythrocytic 2                                      |
| SREBF1, B2        | sterol regulatory element binding transcription factor 1, 2            |
| ST5               | suppression of tumorigenicity 5                                        |
| STARD13, 3, 4     | STAR related lipid transfer domain containing 13, 3, 4                 |
| STAT1, 2          | signal transducer and activator of transcription 1, 2                  |
| STEAP2            | STEAP2 metalloreductase                                                |
| STK26             | serine/threonine protein kinase 26                                     |
| SV2A              | synaptic vesicle glycoprotein 2A                                       |
| SVIL              | supervillin                                                            |
| SYK               | spleen associated tyrosine kinase                                      |
| SYNE1             | spectrin repeat containing nuclear envelope protein 1                  |
| TAF1D             | TATA-box binding protein associated factor, RNA polymerase I subunit D |
| TAP1              | transporter 1, ATP binding cassette subfamily B member                 |
| TAS1R3            | taste 1 receptor member 3                                              |
| TBC1D17, 4        | TBC1 domain family member 17, 4                                        |
| TCEA1             | transcription elongation factor A1                                     |
| TDGF1             | teratocarcinoma-derived growth factor 1                                |
| TEF               | TEF, PAR bZIP transcription factor                                     |
| TEK               | TEK receptor tyrosine kinase, Tie2                                     |
| TFAP4             | transcription factor AP-4 (activating enhancer binding protein 4)      |
| TFRC              | transferrin receptor                                                   |
| TGFB1/1           | transforming growth factor beta 1 induced transcript 1                 |
| TGM2              | transglutaminase 2                                                     |
| THBS1             | thrombospondin 1                                                       |
| TIA1              | TIA1 cytotoxic granule-associated RNA binding protein                  |
| TIMP1             | Metallopeptidase inhibitor 1                                           |
| TINAGL1           | tubulointerstitial nephritis antigen like 1                            |
| TMED7             | transmembrane p24 trafficking protein 7                                |
| TNC               | tenascin C                                                             |
| TNFRSF11B, 19, 1B | TNF receptor superfamily member 11B, 19, 1B                            |
| TP53INP2          | tumor protein p53 inducible nuclear protein 2                          |
| TRABD2A           | TraB domain containing 2A                                              |
| TRAF5             | TNF receptor associated factor 5                                       |
| TRDC              | T cell receptor delta constant                                         |
| TRIM21, 29, 69    | tripartite motif containing 21, 29, 69                                 |
| TRMT11            | tRNA methyltransferase 11 homolog                                      |
| TRNT1             | tRNA nucleotidyl transferase 1                                         |
| TRUB1             | TruB pseudouridine synthase family member 1                            |
| TUBA1A1           | tubulin alpha 1a                                                       |
| TWF1              | twinfilin actin binding protein 1                                      |
| TXNRD1            | thioredoxin reductase 1                                                |
| TYRO3             | TYRO3 protein tyrosine kinase, Sky                                     |
| U2SURP            | U2 snRNP associated SURP domain containing                             |
| UBE2L6            | ubiquitin conjugating enzyme E2 L6                                     |
| VAMP8             | vesicle associated membrane protein 8                                  |
| VDAC3             | voltage dependent anion channel 3                                      |
| VDR               | vitamin D (1,25- dihydroxyvitamin D3) receptor                         |
| VEGFA, B          | vascular endothelial growth factor A, B                                |
| VEGFR             | vascular endothelial growth factor receptor                            |
| VMP1              | vacuole membrane protein 1                                             |
| VPS13A            | vacuolar protein sorting 13 homolog A                                  |
| VPS18             | VPS18, CORVET/HOPS core subunit                                        |
| WASL              | Wiskott-Aldrich syndrome like                                          |
| WBP2              | WW domain binding protein 2                                            |
| WDR19, 35, 36, 43 | WD repeat domain 19, 35, 36, 43                                        |
| WNK2              | WNK lysine deficient protein kinase 2                                  |
| WNT               | proto-oncogene Wnt, wingless-type MMTV integration site family         |
| WWOX              | WW domain containing oxidoreductase                                    |
| XPOT              | exportin for tRNA                                                      |
| YRDC              | yrDC N6-threonylcarbamoyltransferase domain containing                 |
| ZBTB10, 21,7C     | zinc finger and BTB domain containing 10, 21, 7C                       |
| ZFAS1             | ZNF1 antisense RNA 1                                                   |
| ZMYM1             | zinc finger MYM-type containing 1                                      |

Table S1 cont.

| <b>Symbol</b>    | <b>Gene Name</b>                     |
|------------------|--------------------------------------|
| ZNF121, 146, 267 | zinc finger protein 121, 146, 267    |
| ZNF280C, 518A    | zinc finger protein 280C, 518A       |
| ZNF697, 704      | zinc finger protein 697, 704         |
| ZNF770, 831, 92  | zinc finger protein 770, 831, 92     |
| ZRANB2           | zinc finger RANBP2-type containing 2 |



TableS2  
**Antibodies and Reagents**  
Table S2A  
**Antibodies**

| Antibody                | origin  | supplier                     |
|-------------------------|---------|------------------------------|
| Actin                   | mouse   | Becton Dickinson, HD, G      |
| AIF                     | rabbit  | Santa Cruz, HD, G            |
| AKT                     | mouse   | Becton Dickinson, HD, G      |
| p-AKT                   | mouse   | Becton Dickinson, HD, G      |
| APC                     | mouse   | Cell Signaling, Frankfurt, G |
| Axin1                   | rabbit  | Santa Cruz, HD, G            |
| Axin2                   | rabbit  | Santa Cruz, HD, G            |
| BAD                     | hamster | Becton Dickinson, HD, G      |
| p-BAD                   | rabbit  | Cell Signaling, Frankfurt, G |
| BAK                     | rabbit  | Becton Dickinson, HD, G      |
| BAX                     | rabbit  | Becton Dickinson, HD, G      |
| BCL2                    | rabbit  | Becton Dickinson, HD, G      |
| BCLXL                   | rabbit  | Cell Signaling, Frankfurt, G |
| BID                     | mouse   | Becton Dickinson, HD, G      |
| Caspase1                | mouse   | Becton Dickinson, HD, G      |
| Caspase3                | mouse   | Becton Dickinson, HD, G      |
| Casp3-activ.            | rabbit  | Becton Dickinson, HD, G      |
| Caspase9                | mouse   | Becton Dickinson, HD, G      |
| Casp9-cleaved           | rabbit  | Cell Signaling, Frankfurt, G |
| CD9                     | mouse   | ImmunoTools, Friesoythe, G   |
| CD11b (m)               | rat     | Becton Dickinson, HD, G      |
| CD31 (m)                | rat     | Becton Dickinson, HD, G      |
| CD44v6 (vFF18)          | mouse   | [1]                          |
| CD49c                   | mouse   | Becton Dickinson, HD, G      |
| CD49e                   | mouse   | Becton Dickinson, HD, G      |
| CD49f                   | mouse   | Becton Dickinson, HD, G      |
| CD54                    | mouse   | Becton Dickinson, HD, G      |
| CD56                    | mouse   | Becton Dickinson, HD, G      |
| CD63                    | mouse   | Becton Dickinson, HD, G      |
| CD81                    | mouse   | Becton Dickinson, HD, G      |
| CD95                    | hamster | Becton Dickinson, HD, G      |
| CD95L                   | hamster | Becton Dickinson, HD, G      |
| CD104                   | rabbit  | Becton Dickinson, HD, G      |
| CD106                   | mouse   | Becton Dickinson, HD, G      |
| CD133                   | rabbit  | Becton Dickinson, HD, G      |
| CD166                   | mouse   | Becton Dickinson, HD, G      |
| CD184 (CXCR4)           | mouse   | Becton Dickinson, HD, G      |
| CytochromC              | mouse   | Becton Dickinson, HD, G      |
| E-cadherin              | mouse   | Becton Dickinson, HD, G      |
| EGFR (p)                | mouse   | BioTrend, Cologne, G         |
| p-EGFR                  | mouse   | Cell Signaling, Frankfurt, G |
| EpCAM (HEA125)          | mouse   | [2]                          |
| EphA1                   | rabbit  | SantaCruz, HD, G             |
| EphA4                   | rabbit  | Santa Cruz, HD, G            |
| ERK1/2                  | mouse   | Becton Dickinson, HD, G      |
| p-ERK1/2                | mouse   | Becton Dickinson, HD, G      |
| Ezrin                   | rabbit  | Sigma, Munich, G             |
| p-Ezrin                 | rabbit  | Santa Cruz, HD, G            |
| FAK                     | rabbit  | Cell Signaling, Frankfurt, G |
| p-FAK                   | rabbit  | Cell Signaling, Frankfurt, G |
| Fos                     | rabbit  | Cell Signaling, Frankfurt, G |
| FN                      | mouse   | Becton Dickinson, HD, G      |
| Gr1 (m)                 | rat     | Becton Dickinson, HD, G      |
| HER2 (p)                | mouse   | Becton Dickinson, HD, G      |
| IGFR1                   | mouse   | Becton Dickinson, HD, G      |
| IGFR2                   | mouse   | Becton Dickinson, HD, G      |
| I $\kappa$ B $\alpha$   | rabbit  | Santa Cruz, HD, G            |
| p-I $\kappa$ B $\alpha$ | mouse   | Becton Dickinson, HD, G      |
| InsR                    | rabbit  | SantaCruz, HD, G             |
| JNK                     | rabbit  | G Santa Cruz, HD, G          |
| p-JNK                   | mouse   | Becton Dickinson, HD, G      |
| Jun                     | rabbit  | Santa Cruz, HD, G            |
| p-Jun                   | mouse   | Becton Dickinson, HD, G      |
| MDR1                    | mouse   | Becton Dickinson, HD, G      |
| MET                     | mouse   | Cell Signaling, Frankfurt, G |
| MMP2                    | rabbit  | Dianova, Hamburg, G          |
| MMP9                    | rabbit  | Dianova, Hamburg, G          |
| MTOR                    | rabbit  | Cell Signaling, Frankfurt, G |
| NANOG                   | rabbit  | Santa Cruz, HD, G            |
| N-Cadherin              | mouse   | Becton Dickinson, HD, G      |
| NFAT                    | mouse   | Becton Dickinson, HD, G      |
| NGFR                    | mouse   | Becton Dickinson, HD, G      |
| NOTCH                   | mouse   | Biolegend, San Diego, Ca, US |

Table S2A contin.

| <u>Antibody</u>                                           | <u>origin</u> | <u>supplier</u>                     |
|-----------------------------------------------------------|---------------|-------------------------------------|
| p-P38                                                     | rabbit        | Santa Cruz, HD, G Santa Cruz, HD, G |
| Parp                                                      | mouse         | Biolegend, San Diego, Ca, US        |
| Parp-cleaved                                              | mouse         | Biolegend, San Diego, Ca, US        |
| PDGFRA                                                    | mouse         | Becton Dickinson, HD, G             |
| PDGFRB                                                    | mouse         | Becton Dickinson, HD, G             |
| PI3K                                                      | rabbit        | Cell Signaling, Frankfurt, G        |
| p-PI3K                                                    | rabbit        | Cell Signaling, Frankfurt, G        |
| p-PKC                                                     | rabbit        | Cell Signaling, Frankfurt, G        |
| p-PLC                                                     | rabbit        | Cell Signaling, Frankfurt, G        |
| Pten                                                      | rabbit        | Cell Signaling, Frankfurt, G        |
| p-Pten                                                    | rabbit        | Cell Signaling, Frankfurt, G        |
| p-Rac                                                     | rabbit        | Cell Signaling, Frankfurt, G        |
| p-Ras                                                     | mouse         | Santa Cruz, HD, G                   |
| RhoGDI                                                    | rabbit        | Abcam, Cambridge, GB                |
| SLUG                                                      | rabbit        | Santa Cruz, HD, G                   |
| SMAC/DIABLO                                               | mouse         | Becton Dickinson, HD, G             |
| SNAIL                                                     | rabbit        | Santa Cruz, HD, G                   |
| SOX2                                                      | rabbit        | Santa Cruz, HD, G                   |
| Src                                                       | rabbit        | Santa Cruz, HD, G                   |
| p-src                                                     | rabbit        | Cell Signaling, Frankfurt, G        |
| Syndecan                                                  | rabbit        | Santa Cruz, HD, G                   |
| TIMP1                                                     | mouse         | Santa Cruz, HD, G                   |
| TNFR1                                                     | mouse         | Becton Dickinson, HD, G             |
| TNFR2                                                     | rat           | Santa Cruz, HD, G                   |
| TRAIL                                                     | rabbit        | Santa Cruz, HD, G                   |
| Tspan8 (CO029)                                            | mouse         | [3]                                 |
| TWIST                                                     | rabbit        | Becton Dickinson, HD, G             |
| UPAR                                                      | mouse         | Calbiochem, Darmstadt, G            |
| VEGFR1                                                    | mouse         | Becton Dickinson, HD, G             |
| VEGFR2                                                    | mouse         | Becton Dickinson, HD, G             |
| VEGFR3                                                    | rabbit        | Santa Cruz, HD, G                   |
| VIMENTIN                                                  | mouse         | Becton Dickinson, HD, G             |
| Wnt1                                                      | rabbit        | Santa Cruz, HD, G                   |
| Wnt5a/b                                                   | rabbit        | Santa Cruz, HD, G                   |
| XIAP                                                      | mouse         | Becton Dickinson, HD, G             |
| ZEB1                                                      | rabbit        | Santa Cruz, HD, G                   |
| dye or biotin labeled secondary antibodies / Streptavidin |               | Dianova, Becton Dickinson, Amersham |

Table S2B

**Reagents**

| <u>Reagent</u>                            | <u>Dose</u> | <u>Supplier</u>          |
|-------------------------------------------|-------------|--------------------------|
| AnnexinV-FITC / -APC                      | variable    | Becton Dickinson, HD, G  |
| CFSE (carboxyfluoresc.-succinimidylester) | 5µM         | Invitrogen, Darmstadt, G |
| Cisplatin                                 | 5-30µg/ml   | Sigma, Munich, G         |
| DAPI                                      | 1µg/ml      | Invitrogen, Darmstadt, G |
| PI                                        | variable    | Becton Dickinson, HD, G  |

Table S2C

**qRT-PCR miRNA primers****Primers**

|              |                                                     |
|--------------|-----------------------------------------------------|
| miR-1246 SL  | GTTGGCTCTGGTGCAGGTCCAGGTATTCGCACCAGAGCCAACCCTGCT    |
| miR-1246 fw  | GGGCTAATGGATTTTTGGAGC                               |
| miR-3196 SL  | GTTGGCTCTGGTGCAGGGTCCGAGGTATTCGCACCAGAGCCAAC GAGGCC |
| miR-3196 fw  | TTTTTTCGGGGCGGCAGG                                  |
| miR-6087 SL  | GTTGGCTCTGGTGCAGGGTCCGAGGTATTCGCACCAGAGCCAAC GCTCGC |
| miR-6087 fw  | TTGTTTTGAGGCGGGGG                                   |
| miR-7704 SL  | GTTGGCTCTGGTGCAGGGTCCGAGGTATTCGCACCAGAGCCAAC GCCGGG |
| miR-7704 fw  | TTTTTTCGGGGTCCGCGG                                  |
| Univ.reverse | GTGCAGGGTCCGAGGT                                    |

**References**

- Seiter S, Tilgen W, Herrmann K, Schadendorf D, Patzelt E., Möller P, et al. Expression of CD44 splice variants in human skin and epidermal tumours. *Virchows Arch.* 1996;428:141-9.
- Momburg F, Moldenhauer G, Hämmerling GJ, Möller P. Immunohistochemical study of the expression of a Mr 34,000 human epithelium-specific surface glycoprotein in normal and malignant tissues. *Cancer Res.* 1987;47:2883-91.
- Sela BA, Steplewski Z, Koprowski H. Colon carcinoma-associated glycoproteins recognized by monoclonal antibodies CO-029 and GA22-2. *Hybridoma.* 1989;8:481-91.

Table S3

**The impact of CIC-TEX treatment on mRNA recovery in CD44v6kd and Tspan8k cells**

Table S3A

**Increased mRNA recovery in CIC-TEX-treated Tspan8kd cells**

| Symbol    | Tsp8kd | Tsp8kd+TEX | Tsp8kd+TEX: |        | Gene Name                                                  |
|-----------|--------|------------|-------------|--------|------------------------------------------------------------|
|           |        |            | Tsp8kd      | Tsp8kd |                                                            |
| ADAM19    | 2957   | 7989       | 2.702       |        | ADAM metallopeptidase domain 19                            |
| AHNAK2    | 734    | 1928       | 2.625       |        | AHNAK nucleoprotein 2                                      |
| AKAP12    | 1433   | 4331       | 3.023       |        | A-kinase anchoring protein 12                              |
| AKR1B10   | 1393   | 2848       | 2.044       |        | aldo-keto reductase family 1 member B10                    |
| ANXA10    | 1679   | 3758       | 2.238       |        | annexin A10                                                |
| CALB2     | 2954   | 5968       | 2.02        |        | calbindin 2                                                |
| CAPRIN2   | 2225   | 6480       | 2.912       |        | caprin family member 2                                     |
| CCAT1     | 624    | 1253       | 2.007       |        | colon cancer associated transcript 1 (non-protein coding)  |
| CEACAM5   | 321    | 4033       | 12.578      |        | carcinoembryonic antigen related cell adhesion molecule 5  |
| CEACAM6   | 1230   | 8612       | 7.003       |        | carcinoembryonic antigen related cell adhesion molecule 6  |
| CEMIP     | 4256   | 9726       | 2.285       |        | cell migration inducing hyaluronan binding protein         |
| CHAC1     | 710    | 1713       | 2.414       |        | ChaC glutathione specific gamma-glutamylcyclotransferase 1 |
| COL17A1   | 3337   | 8869       | 2.658       |        | collagen type XVII alpha 1                                 |
| DCBLD2    | 3135   | 7757       | 2.474       |        | discoïdin, CUB and LCCL domain containing 2                |
| DDIT3     | 612    | 1646       | 2.69        |        | DNA damage inducible transcript 3                          |
| DDIT4     | 1828   | 4879       | 2.668       |        | DNA damage inducible transcript 4                          |
| DKK1      | 2518   | 6444       | 2.559       |        | dickkopf WNT signaling pathway inhibitor 1                 |
| DUSP5     | 568    | 1135       | 1.997       |        | dual specificity phosphatase 5                             |
| EGR1      | 1742   | 3700       | 2.124       |        | early growth response 1                                    |
| EMP1      | 1981   | 5526       | 2.79        |        | epithelial membrane protein 1                              |
| EREG      | 8012   | 16798      | 2.097       |        | Epiregulin                                                 |
| ERRFI1    | 4536   | 13557      | 2.989       |        | ERBB receptor feedback inhibitor 1                         |
| FAM129A   | 1730   | 3450       | 1.994       |        | family with sequence similarity 129 member A               |
| FAM135A   | 930    | 1894       | 2.036       |        | family with sequence similarity 135 member A               |
| FRMD5     | 621    | 1236       | 1.991       |        | FERM domain containing 5                                   |
| H1F0      | 11089  | 33900      | 3.057       |        | H1 histone family member 0                                 |
| HMGA1     | 32429  | 66203      | 2.041       |        | high mobility group AT-hook 1                              |
| ID1       | 1280   | 3276       | 2.559       |        | inhibitor of DNA binding 1, HLH protein                    |
| IFI27     | 1863   | 6985       | 3.749       |        | interferon alpha inducible protein 27                      |
| IFI6      | 1105   | 2514       | 2.275       |        | interferon alpha inducible protein 6                       |
| IGFBP6    | 3224   | 6619       | 2.053       |        | insulin like growth factor binding protein 6               |
| JAG1      | 1956   | 6030       | 3.083       |        | jagged 1                                                   |
| KLK10     | 1770   | 3634       | 2.053       |        | kallikrein related peptidase 10                            |
| LAMA3     | 1699   | 3660       | 2.154       |        | laminin subunit alpha 3                                    |
| LAMC2     | 1850   | 4027       | 2.177       |        | laminin subunit gamma 2                                    |
| LCN2      | 8428   | 17538      | 2.081       |        | lipocalin 2                                                |
| LINC00941 | 374    | 1534       | 4.097       |        | long intergenic non-protein coding RNA 941                 |
| MAOB      | 543    | 1190       | 2.193       |        | monoamine oxidase B                                        |
| NDRG1     | 2303   | 6502       | 2.824       |        | N-myc downstream regulated 1                               |
| NEBL      | 827    | 1797       | 2.173       |        | Nebulette                                                  |
| NR1D1     | 723    | 2202       | 3.045       |        | nuclear receptor subfamily 1 group D member 1              |
| NR1D2     | 1248   | 2932       | 2.35        |        | nuclear receptor subfamily 1 group D member 2              |
| NRP1      | 933    | 2345       | 2.514       |        | neuropilin 1                                               |
| NTSR1     | 3605   | 8527       | 2.365       |        | neurotensin receptor 1 (high affinity)                     |
| PER1      | 667    | 1406       | 2.109       |        | period circadian clock 1                                   |
| PMEPA1    | 4418   | 9628       | 2.179       |        | prostate transmembrane protein, androgen induced 1         |
| PSD3      | 1879   | 3824       | 2.035       |        | pleckstrin and Sec7 domain containing 3                    |
| SCEL      | 714    | 2590       | 3.627       |        | Sciellin                                                   |
| SERPINE2  | 612    | 1315       | 2.148       |        | serpin family E member 2                                   |
| SLCO4A1   | 1270   | 3104       | 2.444       |        | solute carrier organic anion transporter family member 4A1 |
| SMOX      | 1392   | 3598       | 2.584       |        | spermine oxidase                                           |
| UPP1      | 697    | 2110       | 3.027       |        | uridine phosphorylase 1                                    |

Table S3B

**Increased mRNA recovery in CIC-TEX-treated CD44v6kd cells**

| Symbol   | CD44v6kd | CD44v6kd<br>+TEX | v6kd+TEX:<br>v6kd | Gene Name                                                       |
|----------|----------|------------------|-------------------|-----------------------------------------------------------------|
| ABCA3    | 1475     | 3161             | 2.143             | ATP binding cassette subfamily A member 3                       |
| ABCC3    | 1023     | 2101             | 2.054             | ATP binding cassette subfamily C member 3                       |
| ABCC4    | 1081     | 2576             | 2.383             | ATP binding cassette subfamily C member 4                       |
| ABCE1    | 2367     | 5887             | 2.487             | ATP binding cassette subfamily E member 1                       |
| ADGRL1   | 1235     | 2472             | 2.002             | adhesion G protein-coupled receptor L1                          |
| AGTPBP1  | 736      | 1697             | 2.305             | ATP/GTP binding protein 1                                       |
| AHNAK2   | 1124     | 2857             | 2.542             | AHNAK nucleoprotein 2                                           |
| AHSA2    | 753      | 1670             | 2.218             | AHA1, activator of heat shock 90kDa protein                     |
| AKAP12   | 2129     | 5899             | 2.771             | A-kinase anchoring protein 12                                   |
| AKNA     | 330      | 1118             | 3.389             | AT-hook transcription factor                                    |
| ANO1     | 4644     | 9998             | 2.153             | anoctamin 1                                                     |
| AP1AR    | 610      | 1304             | 2.138             | adaptor related protein complex 1 associated regulatory protein |
| ARGLU1   | 1471     | 4483             | 3.047             | arginine and glutamate rich 1                                   |
| ARL5B    | 1318     | 2787             | 2.115             | ADP ribosylation factor like GTPase 5B                          |
| ASNS     | 5813     | 26338            | 4.531             | asparagine synthetase (glutamine-hydrolyzing)                   |
| ASS1     | 2767     | 5833             | 2.108             | argininosuccinate synthase 1                                    |
| ATF3     | 508      | 1149             | 2.262             | activating transcription factor 3                               |
| ATP11A   | 3036     | 6499             | 2.141             | ATPase phospholipid transporting 11A                            |
| ATP13A3  | 5803     | 11534            | 1.988             | ATPase 13A3                                                     |
| B3GNT5   | 562      | 1152             | 2.049             | UDP-GlcNAc:betaGal beta-1,3-N-acetylglucosaminyltransf 5        |
| B4GALNT4 | 418      | 1097             | 2.624             | beta-1,4-N-acetyl-galactosaminyltransferase 4                   |
| BAG2     | 1348     | 2773             | 2.057             | BCL2 associated athanogene 2                                    |
| BAZ1A    | 2091     | 4375             | 2.092             | bromodomain adjacent to zinc finger domain 1A                   |
| BDP1     | 1603     | 3594             | 2.242             | B double prime 1, subunit polymerase IIIB                       |
| BMI1     | 511      | 1331             | 2.604             | BMI1 proto-oncogene, polycomb ring finger                       |
| BRWD1    | 2618     | 5939             | 2.269             | bromodomain and WD repeat domain containing 1                   |
| BTAFL1   | 2307     | 5829             | 2.527             | B-TFIID TATA-box binding protein associated factor 1            |
| C6orf48  | 2450     | 4933             | 2.013             | chromosome 6 open reading frame 48                              |
| CAPRIN2  | 631      | 1650             | 2.615             | caprin family member 2                                          |
| CARNMT1  | 680      | 1647             | 2.422             | carosine N-methyltransferase 1                                  |
| CBS/CBSL | 1946     | 4273             | 2.196             | cystathionine-beta-synthase                                     |
| CCDC112  | 528      | 1534             | 2.905             | coiled-coil domain containing 112                               |
| CCDC14   | 1242     | 2739             | 2.205             | coiled-coil domain containing 14                                |
| CCND2    | 1747     | 5230             | 2.994             | cyclin D2                                                       |
| CCNL1    | 1820     | 4429             | 2.434             | cyclin L1                                                       |
| CCNT2    | 1194     | 2501             | 2.095             | cyclin T2                                                       |
| CD55     | 283      | 1411             | 4.985             | CD55 molecule (Cromer blood group)                              |
| CDC42EP1 | 178      | 1171             | 6.576             | CDC42 effector protein 1                                        |
| CDK6     | 3158     | 9488             | 3.004             | cyclin dependent kinase 6                                       |
| CEBPG    | 1899     | 4959             | 2.612             | CCAAT/enhancer binding protein gamma                            |
| CENPJ    | 1438     | 3038             | 2.112             | centromere protein J                                            |
| CEP290   | 633      | 1907             | 3.012             | centrosomal protein 290                                         |
| CFAP97   | 3123     | 6474             | 2.073             | cilia and flagella associated protein 97                        |
| CHML     | 919      | 2395             | 2.606             | CHM like, Rab escort protein 2                                  |
| CHORDC1  | 864      | 2489             | 2.88              | cysteine and histidine rich domain containing 1                 |
| CLDND1   | 548      | 1111             | 2.027             | claudin domain containing 1                                     |
| CLK1     | 1589     | 4123             | 2.595             | CDC like kinase 1                                               |
| CMTM4    | 2831     | 5835             | 2.061             | CKLF like MARVEL transmembrane domain containing 4              |
| CNTRL    | 496      | 1120             | 2.258             | Centriolin                                                      |
| CREBZF   | 1230     | 3739             | 3.04              | CREB/ATF bZIP transcription factor                              |
| CSNK1A1  | 443      | 1087             | 2.453             | casein kinase 1 alpha 1                                         |
| DCAF17   | 574      | 1201             | 2.093             | DDB1 and CUL4 associated factor 17                              |
| DCBLD2   | 3053     | 11916            | 3.903             | discoidin, CUB and LCCL domain containing 2                     |
| DCUN1D4  | 722      | 1771             | 2.452             | defective in cullin neddylation 1 domain containing 4           |

Table S3B continued

| Symbol     | CD44v6kd | CD44v6kd<br>+TEX | v6kd+TEX:<br>v6kd | Gene Name                                                 |
|------------|----------|------------------|-------------------|-----------------------------------------------------------|
| DDIT3      | 634      | 1294             | 2.041             | DNA damage inducible transcript 3                         |
| DDX21      | 8676     | 18053            | 2.081             | DEAD-box helicase 21                                      |
| DGKE       | 615      | 1333             | 2.168             | diacylglycerol kinase epsilon                             |
| DGKH       | 2233     | 4493             | 2.012             | diacylglycerol kinase eta                                 |
| DICER1     | 2766     | 5784             | 2.091             | dicer 1, ribonuclease III                                 |
| DLGAP1-AS2 | 2430     | 4851             | 1.996             | DLGAP1 antisense RNA 2                                    |
| DNAH14     | 513      | 1291             | 2.517             | dynein axonemal heavy chain 14                            |
| DNAJB14    | 784      | 1682             | 2.145             | DnaJ heat shock protein family (Hsp40) member B14         |
| DNAJC2     | 2044     | 4155             | 2.033             | DnaJ heat shock protein family (Hsp40) member C2          |
| DOCK6      | 435      | 1257             | 2.89              | dedicator of cytokinesis 6                                |
| DPY19L3    | 577      | 1562             | 2.707             | dpy-19 like 3 (C. elegans)                                |
| DST        | 1300     | 5515             | 4.242             | Dystonin                                                  |
| DUS4L      | 593      | 1271             | 2.143             | dihydrouridine synthase 4 like                            |
| DVL1       | 4848     | 10235            | 2.111             | dishevelled segment polarity protein 1                    |
| EDEM3      | 1139     | 2445             | 2.147             | ER degradation enhancing alpha-mannosidase like protein 3 |
| EFHC1      | 680      | 1387             | 2.039             | EF-hand domain containing 1                               |
| EIF1AX     | 1185     | 2421             | 2.043             | eukaryotic translation initiation factor 1A, X-linked     |
| EIF3J      | 2929     | 6047             | 2.065             | eukaryotic translation initiation factor 3 subunit J      |
| EIF4A2     | 7489     | 15815            | 2.112             | eukaryotic translation initiation factor 4A2              |
| EMP1       | 1511     | 4992             | 3.304             | epithelial membrane protein 1                             |
| ENAH       | 3202     | 6730             | 2.102             | enabled homolog (Drosophila)                              |
| ESF1       | 813      | 1660             | 2.042             | ESF1 nucleolar pre-rRNA processing protein homolog        |
| FAM107B    | 972      | 2397             | 2.466             | family with sequence similarity 107 member B              |
| FAM129A    | 122      | 1052             | 8.626             | family with sequence similarity 129 member A              |
| FAM135A    | 394      | 1018             | 2.584             | family with sequence similarity 135 member A              |
| FAM171A1   | 594      | 1207             | 2.033             | family with sequence similarity 171 member A1             |
| FAM60A     | 2818     | 5934             | 2.106             | family with sequence similarity 60 member A               |
| FBRSL1     | 1094     | 2294             | 2.097             | fibrosin like 1                                           |
| FHL1       | 411      | 2053             | 4.994             | four and a half LIM domains 1                             |
| FMNL2      | 2008     | 4287             | 2.135             | formin like 2                                             |
| FOXN2      | 922      | 2261             | 2.452             | forkhead box N2                                           |
| FSTL3      | 203      | 1136             | 5.597             | follicle-stimulating-like 3                               |
| GAL        | 950      | 2326             | 2.448             | galanin and GMAP prepropeptide                            |
| GALNT18    | 617      | 1526             | 2.474             | polypeptide N-acetylgalactosaminyltransferase 18          |
| GAS5       | 5263     | 12864            | 2.444             | growth arrest specific 5 (non-protein coding)             |
| GCLC       | 1541     | 3889             | 2.524             | glutamate-cysteine ligase catalytic subunit               |
| GCLM       | 1261     | 3361             | 2.665             | glutamate-cysteine ligase modifier subunit                |
| GDF15      | 1592     | 4419             | 2.776             | growth differentiation factor 15                          |
| GEMIN5     | 2369     | 5416             | 2.286             | gem nuclear organelle associated protein 5                |
| GNL3       | 2381     | 6260             | 2.629             | G protein nucleolar 3                                     |
| GOLT1B     | 1204     | 2428             | 2.016             | golgi transport 1B                                        |
| GPD1L      | 888      | 2152             | 2.423             | glycerol-3-phosphate dehydrogenase 1-like                 |
| GPRC5A     | 623      | 2166             | 3.476             | G protein-coupled receptor class C group 5 member A       |
| GRB10      | 179      | 1641             | 9.167             | growth factor receptor bound protein 10                   |
| GSTP1      | 959      | 2078             | 2.167             | glutathione S-transferase pi 1                            |
| GTF2F2     | 2414     | 4904             | 2.031             | general transcription factor IIF subunit 2                |
| HAUS6      | 1403     | 2903             | 2.069             | HAUS augmin like complex subunit 6                        |
| HES7       | 524      | 1240             | 2.367             | hes family bHLH transcription factor 7                    |
| HK2        | 1711     | 3530             | 2.063             | hexokinase 2                                              |
| HMGA1      | 23082    | 46601            | 2.019             | high mobility group AT-hook 1                             |
| HSPA1A/1B  | 765      | 2131             | 2.786             | heat shock protein family A (Hsp70) member 1A             |
| INHBE      | 662      | 1365             | 2.062             | inhibin beta E subunit                                    |
| IPMK       | 418      | 1009             | 2.414             | inositol polyphosphate multikinase                        |
| JPH1       | 506      | 1472             | 2.909             | junctionophilin 1                                         |

Table S3B continued

| Symbol   | CD44v6kd | CD44v6kd<br>+TEX | v6kd+TEX:<br>v6kd | Gene Name                                                      |
|----------|----------|------------------|-------------------|----------------------------------------------------------------|
| KCNQ1OT1 | 695      | 1420             | 2.043             | KCNQ1 opposite strand/antisense transcript 1                   |
| KIAA1551 | 556      | 1193             | 2.147             | KIAA1551                                                       |
| KIAA1804 | 1032     | 2597             | 2.516             | mixed lineage kinase 4                                         |
| KIF21A   | 913      | 1965             | 2.152             | kinesin family member 21A                                      |
| KLHL17   | 625      | 1608             | 2.573             | kelch like family member 17                                    |
| L1CAM    | 465      | 2035             | 4.376             | L1 cell adhesion molecule                                      |
| LAMB3    | 1517     | 3353             | 2.21              | laminin subunit beta 3                                         |
| LCOR     | 1174     | 2434             | 2.073             | ligand dependent nuclear receptor corepressor                  |
| LENG8    | 2506     | 5624             | 2.244             | leukocyte receptor cluster member 8                            |
| LIN7C    | 806      | 1676             | 2.08              | lin-7 homolog C, crumbs cell polarity complex component        |
| SIK1     | 662      | 1537             | 2.321             | salt inducible kinase 1                                        |
| LUC7L3   | 2366     | 8118             | 3.431             | LUC7 like 3 pre-mRNA splicing factor                           |
| LYPLA1   | 2020     | 4184             | 2.071             | lysophospholipase I                                            |
| MAFK     | 469      | 1009             | 2.152             | MAF bZIP transcription factor K                                |
| MAK16    | 689      | 1432             | 2.079             | MAK16 homolog                                                  |
| MAL2     | 4146     | 8340             | 2.012             | mal, T-cell differentiation protein 2 (gene/pseudogene)        |
| MALAT1   | 4201     | 17347            | 4.129             | metastasis associated lung adenocarcinoma transcript 1         |
| MAPK8IP3 | 1111     | 2363             | 2.127             | mitogen-activated protein kinase 8 interacting protein 3       |
| MAT2A    | 5655     | 13086            | 2.314             | methionine adenosyltransferase 2A                              |
| MBNL2    | 766      | 1694             | 2.212             | muscleblind like splicing regulator 2                          |
| MBP      | 613      | 1237             | 2.017             | myelin basic protein                                           |
| MCOLN3   | 767      | 1605             | 2.093             | mucolipin 3                                                    |
| MDN1     | 2213     | 4399             | 1.988             | midasin AAA ATPase 1                                           |
| MIB1     | 2744     | 5700             | 2.077             | mindbomb E3 ubiquitin protein ligase 1                         |
| MRPL12   | 535      | 1096             | 2.048             | mitochondrial ribosomal protein L12                            |
| MTHFD2   | 6552     | 15060            | 2.299             | methylenetetrahydrofolate dehydrogenase 2                      |
| MT-ND5   | 66592    | 137906           | 2.071             | NADH dehydrogenase, subunit 5 (complex I)                      |
| MTURN    | 449      | 2034             | 4.529             | maturin, neural progenitor differentiation regulator           |
| MXD1     | 1571     | 3245             | 2.065             | MAX dimerization protein 1                                     |
| MXI1     | 1235     | 2684             | 2.174             | MAX interactor 1, dimerization protein                         |
| MYC      | 6589     | 23296            | 3.536             | v-myc avian myelocytomatosis viral oncogene homolog            |
| MYSM1    | 902      | 2067             | 2.291             | Myb like, SWIRM and MPN domains 1                              |
| NAA16    | 740      | 1552             | 2.097             | N(alpha)-acetyltransferase 16, NatA auxiliary subunit          |
| NAA25    | 1298     | 3020             | 2.327             | N(alpha)-acetyltransferase 25, NatB auxiliary subunit          |
| NAE1     | 2976     | 5981             | 2.01              | NEDD8 activating enzyme E1 subunit 1                           |
| NAMPT    | 2289     | 4992             | 2.181             | nicotinamide phosphoribosyltransferase                         |
| NCS1     | 509      | 2295             | 4.51              | neuronal calcium sensor 1                                      |
| NEAT1    | 3531     | 9058             | 2.565             | nuclear paraspeckle assembly transcript 1 (non-protein coding) |
| NEK6     | 462      | 1199             | 2.594             | NIMA related kinase 6                                          |
| NFXL1    | 782      | 1687             | 2.157             | nuclear transcription factor, X-box binding like 1             |
| NKTR     | 1244     | 3169             | 2.547             | natural killer cell triggering receptor                        |
| NMD3     | 3667     | 7479             | 2.039             | NMD3 ribosome export adaptor                                   |
| NOLC1    | 12943    | 27160            | 2.098             | nucleolar and coiled-body phosphoprotein 1                     |
| NOP58    | 4169     | 8455             | 2.028             | NOP58 ribonucleoprotein                                        |
| NR1D1    | 2341     | 5135             | 2.193             | nuclear receptor subfamily 1 group D member 1                  |
| NRP1     | 1308     | 3005             | 2.297             | neuropilin 1                                                   |
| ODC1     | 6478     | 15478            | 2.389             | ornithine decarboxylase 1                                      |
| OGT      | 4423     | 16037            | 3.626             | O-linked N-acetylglucosamine (GlcNAc) transferase              |
| OTUD3    | 505      | 1031             | 2.041             | OTU deubiquitinase 3                                           |
| OTUD6B   | 679      | 1613             | 2.375             | OTU domain containing 6B                                       |
| PABPC1L  | 684      | 2698             | 3.945             | poly(A) binding protein cytoplasmic 1 like                     |
| PAPD5    | 487      | 1385             | 2.845             | PAP associated domain containing 5                             |
| PAQR3    | 599      | 1792             | 2.992             | progesterone and adiponectin receptor family member 3          |
| PARD6B   | 486      | 1079             | 2.22              | par-6 family cell polarity regulator beta                      |

Table S3B continued

| Symbol   | CD44v6kd | CD44v6kd<br>+TEX | v6kd+TEX:<br>v6kd | Gene Name                                                      |
|----------|----------|------------------|-------------------|----------------------------------------------------------------|
| PAWR     | 2382     | 5064             | 2.126             | pro-apoptotic WT1 regulator                                    |
| PAXBP1   | 1829     | 4754             | 2.599             | PAX3 and PAX7 binding protein 1                                |
| PFDN2    | 2354     | 4812             | 2.044             | prefoldin subunit 2                                            |
| PHLDA2   | 585      | 1310             | 2.24              | pleckstrin homology like domain family A member 2              |
| PIM1     | 759      | 1540             | 2.03              | Pim-1 proto-oncogene, serine/threonine kinase                  |
| PIM3     | 1732     | 3455             | 1.995             | Pim-3 proto-oncogene, serine/threonine kinase                  |
| PKD1     | 1136     | 3108             | 2.736             | polycystin 1, transient receptor potential channel interacting |
| PLAUR    | 729      | 1697             | 2.328             | plasminogen activator, urokinase receptor                      |
| PMAIP1   | 1309     | 3451             | 2.636             | phorbol-12-myristate-13-acetate-induced protein 1              |
| PMEPA1   | 1371     | 3316             | 2.419             | prostate transmembrane protein, androgen induced 1             |
| PMS1     | 799      | 1811             | 2.267             | PMS1 homolog 1, mismatch repair system component               |
| PNISR    | 1610     | 3277             | 2.035             | PNN interacting serine and arginine rich protein               |
| PNN      | 4326     | 9989             | 2.309             | pinin, desmosome associated protein                            |
| PODXL    | 1310     | 2606             | 1.989             | podocalyxin like                                               |
| POLQ     | 1073     | 2139             | 1.994             | DNA polymerase theta                                           |
| POLR3E   | 1519     | 3062             | 2.016             | RNA polymerase III subunit E                                   |
| POLR3G   | 332      | 1847             | 5.563             | RNA polymerase III subunit G                                   |
| PPP3CA   | 1433     | 2847             | 1.987             | protein phosphatase 3 catalytic subunit alpha                  |
| PPTC7    | 1068     | 2509             | 2.349             | PTC7 protein phosphatase homolog                               |
| PRMT3    | 1555     | 3549             | 2.282             | protein arginine methyltransferase 3                           |
| PRPF39   | 799      | 1749             | 2.189             | pre-mRNA processing factor 39                                  |
| PRPS2    | 1332     | 3245             | 2.436             | phosphoribosyl pyrophosphate synthetase 2                      |
| PSAT1    | 6706     | 14446            | 2.154             | phosphoserine aminotransferase 1                               |
| PSD3     | 182      | 1610             | 8.848             | pleckstrin and Sec7 domain containing 3                        |
| PTER     | 1185     | 2373             | 2.002             | phosphotriesterase related                                     |
| PUM3     | 1473     | 3011             | 2.044             | pumilio RNA binding family member 3                            |
| PUS7     | 1950     | 4000             | 2.051             | pseudouridylate synthase 7 (putative)                          |
| PVR      | 2873     | 6405             | 2.229             | poliovirus receptor                                            |
| RAB12    | 869      | 2233             | 2.57              | RAB12, member RAS oncogene family                              |
| RABGGTB  | 2625     | 5779             | 2.202             | Rab geranylgeranyltransferase beta subunit                     |
| RAD18    | 715      | 1561             | 2.183             | RAD18, E3 ubiquitin protein ligase                             |
| RBM26    | 1832     | 3781             | 2.064             | RNA binding motif protein 26                                   |
| RBM39    | 6346     | 13679            | 2.155             | RNA binding motif protein 39                                   |
| RHPN1    | 654      | 1443             | 2.206             | rhopilin Rho GTPase binding protein 1                          |
| RICTOR   | 1044     | 2243             | 2.149             | RPTOR independent companion of MTOR complex 2                  |
| RIDA     | 552      | 1176             | 2.13              | reactive intermediate imine deaminase A homolog                |
| RIF1     | 4250     | 9166             | 2.157             | replication timing regulatory factor 1                         |
| RIMKLB   | 376      | 1056             | 2.809             | ribosomal modification protein rimK like family member B       |
| RPF2     | 1161     | 2327             | 2.004             | ribosome production factor 2 homolog                           |
| RPIA     | 1027     | 2062             | 2.007             | ribose 5-phosphate isomerase A                                 |
| RPL32P3  | 374      | 1057             | 2.827             | ribosomal protein L32 pseudogene 3                             |
| RSRC2    | 2127     | 4227             | 1.987             | arginine and serine rich coiled-coil 2                         |
| RSRP1    | 1096     | 2498             | 2.279             | arginine and serine rich protein 1                             |
| S100A2   | 639      | 2325             | 3.638             | S100 calcium binding protein A2                                |
| SACS     | 3533     | 8228             | 2.329             | sacsin molecular chaperone                                     |
| SASS6    | 569      | 1340             | 2.354             | SAS-6 centriolar assembly protein                              |
| SAT1     | 4870     | 11578            | 2.377             | spermidine/spermine N1-acetyltransferase 1                     |
| SCAMP1   | 1253     | 2627             | 2.097             | secretory carrier membrane protein 1                           |
| SCML1    | 834      | 1748             | 2.095             | sex comb on midleg-like 1 (Drosophila)                         |
| SLC19A2  | 540      | 1118             | 2.071             | solute carrier family 19 member 2                              |
| SLC20A1  | 7097     | 15458            | 2.178             | solute carrier family 20 member 1                              |
| SLC25A36 | 2683     | 7144             | 2.663             | solute carrier family 25 member 36                             |
| SLC25A37 | 715      | 1609             | 2.25              | solute carrier family 25 member 37                             |
| SLC35A3  | 563      | 1225             | 2.176             | solute carrier family 35 member A3                             |



Table S3B continued

| Symbol    | CD44v6kd | CD44v6kd<br>+TEX | v6kd+TEX:<br>v6kd | Gene Name                                                         |
|-----------|----------|------------------|-------------------|-------------------------------------------------------------------|
| SLC35F2   | 1219     | 3143             | 2.578             | solute carrier family 35 member F2                                |
| SLC4A7    | 510      | 3123             | 6.123             | solute carrier family 4 member 7                                  |
| SLC7A11   | 274      | 1229             | 4.486             | solute carrier family 7 member 11                                 |
| SLC7A2    | 117      | 1021             | 8.723             | solute carrier family 7 member 2                                  |
| SLFN5     | 691      | 1932             | 2.796             | schlafen family member 5                                          |
| SMC5      | 1620     | 3359             | 2.074             | structural maintenance of chromosomes 5                           |
| SNHG1     | 1852     | 5187             | 2.801             | small nucleolar RNA host gene 1                                   |
| SNHG15    | 1003     | 2076             | 2.069             | small nucleolar RNA host gene 15                                  |
| SNHG17    | 701      | 1399             | 1.996             | small nucleolar RNA host gene 17                                  |
| SOWAHC    | 1207     | 3208             | 2.658             | sosondowah ankyrin repeat domain family member C                  |
| SPNS2     | 1566     | 3172             | 2.026             | sphingolipid transporter 2                                        |
| STEAP1    | 839      | 2326             | 2.772             | six transmembrane epithelial antigen of the prostate 1            |
| STEAP2    | 1014     | 2529             | 2.494             | STEAP2 metalloredutase                                            |
| STK26     | 2998     | 5970             | 1.991             | serine/threonine protein kinase 26                                |
| SVIL      | 282      | 1342             | 4.759             | Supervillin                                                       |
| TAF1D     | 2204     | 5678             | 2.576             | TATA-box binding protein associated factor, polymerase ID         |
| TBC1D4    | 1825     | 3960             | 2.17              | TBC1 domain family member 4                                       |
| TCEA1     | 1634     | 3757             | 2.299             | transcription elongation factor A1                                |
| TEX19     | 534      | 1139             | 2.133             | testis expressed 19                                               |
| TFAP4     | 692      | 1424             | 2.057             | transcription factor AP-4 (activating enhancer binding protein 4) |
| THAP9-AS1 | 694      | 1849             | 2.665             | THAP9 antisense RNA 1                                             |
| TIA1      | 1389     | 2898             | 2.086             | TIA1 cytotoxic granule-associated RNA binding protein             |
| TMED7     | 2066     | 4326             | 2.094             | transmembrane p24 trafficking protein 7                           |
| TMEM168   | 506      | 1154             | 2.281             | transmembrane protein 168                                         |
| TPD52     | 3004     | 6154             | 2.049             | tumor protein D52                                                 |
| TRAF5     | 507      | 1093             | 2.156             | TNF receptor associated factor 5                                  |
| TRMT11    | 572      | 1193             | 2.086             | tRNA methyltransferase 11 homolog                                 |
| TRNT1     | 550      | 1302             | 2.366             | tRNA nucleotidyl transferase 1                                    |
| TRUB1     | 902      | 1931             | 2.14              | TruB pseudouridine synthase family member 1                       |
| TTC14     | 396      | 1256             | 3.171             | tetratricopeptide repeat domain 14                                |
| TXNRD1    | 4802     | 14924            | 3.108             | thioredoxin reductase 1                                           |
| U2SURP    | 7106     | 15134            | 2.13              | U2 snRNP associated SURP domain containing                        |
| UHRF2     | 1131     | 2481             | 2.194             | ubiquitin like with PHD and ring finger domains 2                 |
| UPP1      | 596      | 3968             | 6.658             | uridine phosphorylase 1                                           |
| USPL1     | 929      | 1915             | 2.062             | ubiquitin specific peptidase like 1                               |
| VMP1      | 3127     | 8174             | 2.614             | vacuole membrane protein 1                                        |
| VPS13A    | 2970     | 6025             | 2.028             | vacuolar protein sorting 13 homolog A                             |
| WDR19     | 405      | 1063             | 2.624             | WD repeat domain 19                                               |
| WDR35     | 1189     | 3069             | 2.582             | WD repeat domain 35                                               |
| WDR36     | 2300     | 5636             | 2.45              | WD repeat domain 36                                               |
| WDR43     | 3775     | 7576             | 2.007             | WD repeat domain 43                                               |
| WNK2      | 578      | 1492             | 2.582             | WNK lysine deficient protein kinase 2                             |
| XPOT      | 5223     | 10933            | 2.093             | exportin for tRNA                                                 |
| XRCC2     | 929      | 2002             | 2.155             | X-ray repair cross complementing 2                                |
| YOD1      | 919      | 2620             | 2.85              | YOD1 deubiquitinase                                               |
| YRDC      | 900      | 1790             | 1.988             | yrdc N6-threonylcarbamoyltransferase domain containing            |
| ZBTB10    | 618      | 1233             | 1.995             | zinc finger and BTB domain containing 10                          |
| ZBTB21    | 1123     | 2438             | 2.171             | zinc finger and BTB domain containing 21                          |
| ZCCHC7    | 1114     | 2224             | 1.997             | zinc finger CCHC-type containing 7                                |
| ZFAND1    | 1422     | 3499             | 2.461             | zinc finger AN1-type containing 1                                 |
| ZFAS1     | 4764     | 10723            | 2.251             | ZNF1 antisense RNA 1                                              |
| ZMYM1     | 729      | 1627             | 2.232             | zinc finger MYM-type containing 1                                 |
| ZNF121    | 394      | 1218             | 3.09              | zinc finger protein 121                                           |
| ZNF146    | 3692     | 7551             | 2.045             | zinc finger protein 146                                           |



Table S3B continued

| Symbol  | CD44v6kd | CD44v6kd<br>+TEX | v6kd+TEX:<br>v6kd | Gene Name                            |
|---------|----------|------------------|-------------------|--------------------------------------|
| ZNF267  | 521      | 1313             | 2.52              | zinc finger protein 267              |
| ZNF280C | 444      | 1030             | 2.319             | zinc finger protein 280C             |
| ZNF518A | 604      | 1328             | 2.199             | zinc finger protein 518A             |
| ZNF697  | 1113     | 2328             | 2.092             | zinc finger protein 697              |
| ZNF770  | 1128     | 2459             | 2.18              | zinc finger protein 770              |
| ZNF92   | 491      | 1031             | 2.099             | zinc finger protein 92               |
| ZRANB2  | 2235     | 5606             | 2.508             | zinc finger RANBP2-type containing 2 |

Table S3C

**Decreased mRNA recovery in CIC-TEX-treated Tspan8kd cells**

| Symbol   | Tsp8-kd | Tsp8kd+TEX | Tsp8kd:<br>Tsp8kd+TEX | Gene Name                                                   |
|----------|---------|------------|-----------------------|-------------------------------------------------------------|
| ABCG2    | 4644    | 2235       | 2.078                 | ATP binding cassette subfamily G member 2                   |
| ACSS2    | 1661    | 683        | 2.431                 | acyl-CoA synthetase short-chain family member 2             |
| ADAMTS6  | 1352    | 265        | 5.098                 | ADAM metalloproteinase with thrombospondin type 1 motif 6   |
| ALDH1L1  | 1791    | 390        | 4.593                 | aldehyde dehydrogenase 1 family member L1                   |
| ALDH6A1  | 1766    | 810        | 2.18                  | aldehyde dehydrogenase 6 family member A1                   |
| ALDOC    | 1146    | 424        | 2.705                 | aldolase, fructose-bisphosphate C                           |
| AQP3     | 1316    | 534        | 2.465                 | aquaporin 3 (Gill blood group)                              |
| ARL15    | 1386    | 610        | 2.272                 | ADP ribosylation factor like GTPase 15                      |
| ATP6V1B1 | 1263    | 483        | 2.614                 | ATPase H <sup>+</sup> transporting V1 subunit B1            |
| AZGP1    | 3600    | 1592       | 2.261                 | alpha-2-glycoprotein 1, zinc-binding                        |
| BCAS1    | 5945    | 3009       | 1.976                 | breast carcinoma amplified sequence 1                       |
| BTG2     | 1721    | 728        | 2.365                 | BTG anti-proliferation factor 2                             |
| CACNA1D  | 1587    | 705        | 2.252                 | calcium voltage-gated channel subunit alpha1 D              |
| CEACAM1  | 9303    | 4720       | 1.971                 | carcinoembryonic antigen related cell adhesion molecule 1   |
| CFH      | 1315    | 447        | 2.941                 | complement factor H                                         |
| CLEC3A   | 9588    | 1484       | 6.46                  | C-type lectin domain family 3 member A                      |
| DDX60    | 4491    | 1740       | 2.58                  | DEXD/H-box helicase 60                                      |
| ERMP1    | 11078   | 5048       | 2.194                 | endoplasmic reticulum metalloproteinase 1                   |
| F2R      | 8165    | 3005       | 2.718                 | coagulation factor II thrombin receptor                     |
| FGD3     | 1148    | 569        | 2.017                 | FYVE, RhoGEF and PH domain containing 3                     |
| FUCA1    | 2131    | 966        | 2.207                 | fucosidase, alpha-L- 1, tissue                              |
| GAA      | 2069    | 1003       | 2.064                 | glucosidase alpha, acid                                     |
| GABRP    | 4490    | 2111       | 2.126                 | gamma-aminobutyric acid type A receptor pi subunit          |
| GATA2    | 8199    | 3244       | 2.527                 | GATA binding protein 2                                      |
| GATA2AS1 | 1911    | 863        | 2.214                 | GATA2 antisense RNA 1                                       |
| GBP2     | 1040    | 443        | 2.351                 | guanylate binding protein 2                                 |
| HMGCS1   | 7189    | 2852       | 2.521                 | 3-hydroxy-3-methylglutaryl-CoA synthase 1                   |
| HOTTIP   | 3111    | 1180       | 2.636                 | HOXA distal transcript antisense RNA                        |
| HOXB8    | 2106    | 996        | 2.114                 | homeobox B8                                                 |
| HPGD     | 1037    | 496        | 2.091                 | hydroxyprostaglandin dehydrogenase 15-(NAD)                 |
| IDI1     | 3957    | 1773       | 2.232                 | isopentenyl-diphosphate delta isomerase 1                   |
| IFIT2    | 2916    | 933        | 3.125                 | interferon induced protein with tetratricopeptide repeats 2 |
| IFIT3    | 2839    | 1081       | 2.628                 | interferon induced protein with tetratricopeptide repeats 3 |
| INSIG1   | 3274    | 1013       | 3.233                 | insulin induced gene 1                                      |
| KLHDC7A  | 1266    | 548        | 2.312                 | kelch domain containing 7A                                  |
| LMO4     | 10229   | 3767       | 2.716                 | LIM domain only 4                                           |
| MBOAT2   | 1359    | 591        | 2.299                 | membrane bound O-acyltransferase domain containing 2        |
| MEIS2    | 9415    | 4140       | 2.274                 | Meis homeobox 2                                             |
| MGAM2    | 2484    | 906        | 2.742                 | maltase-glucoamylase 2 (putative)                           |
| MSMO1    | 2912    | 977        | 2.98                  | methylsterol monooxygenase 1                                |
| NCMAP    | 1023    | 519        | 1.974                 | non-compact myelin associated protein                       |
| NOX1     | 1677    | 563        | 2.979                 | NADPH oxidase 1                                             |
| OASL     | 6539    | 2820       | 2.319                 | 2'-5'-oligoadenylate synthetase like                        |
| OLMALINC | 1692    | 731        | 2.313                 | oligodendrocyte maturation-associated long intergenic ncRNA |
| PRICKLE4 | 2683    | 1145       | 2.343                 | prickle planar cell polarity protein 4                      |
| PRSS23   | 6053    | 2498       | 2.423                 | protease, serine 23                                         |
| QPRT     | 1796    | 776        | 2.315                 | quinolinate phosphoribosyltransferase                       |
| RARRES1  | 1380    | 409        | 3.373                 | retinoic acid receptor responder 1                          |
| RARRES3  | 1546    | 263        | 5.87                  | retinoic acid receptor responder 3                          |
| RASL11A  | 1178    | 235        | 5.007                 | RAS like family 11 member A                                 |
| RGS2     | 10876   | 4429       | 2.456                 | regulator of G-protein signaling 2                          |
| RHBDL2   | 1725    | 842        | 2.05                  | rhomboid like 2                                             |
| RNF141   | 3863    | 1790       | 2.158                 | ring finger protein 141                                     |
| SARDH    | 1328    | 458        | 2.901                 | sarcosine dehydrogenase                                     |

Table S3C continued

| Symbol   | Tsp8-kd | Tsp8kd+TEX | Tsp8kd:<br>Tsp8kd+TEX | Gene Name                                    |
|----------|---------|------------|-----------------------|----------------------------------------------|
| SCD      | 34887   | 17273      | 2.02                  | stearoyl-CoA desaturase                      |
| SHROOM1  | 4997    | 899        | 5.561                 | shroom family member 1                       |
| SLC35D1  | 1330    | 556        | 2.393                 | solute carrier family 35 member D1           |
| SLC38A11 | 1551    | 553        | 2.806                 | solute carrier family 38 member 11           |
| SLC40A1  | 4517    | 2230       | 2.025                 | solute carrier family 40 member 1            |
| SLC4A4   | 2337    | 1167       | 2.004                 | solute carrier family 4 member 4             |
| TACSTD2  | 5802    | 2923       | 1.985                 | tumor-associated calcium signal transducer 2 |
| TGM2     | 10533   | 1108       | 9.509                 | transglutaminase 2                           |
| THBS1    | 2225    | 1089       | 2.044                 | thrombospondin 1                             |
| VSIG2    | 2214    | 967        | 2.288                 | V-set and immunoglobulin domain containing 2 |
| WWOX     | 1337    | 653        | 2.05                  | WW domain containing oxidoreductase          |
| ZNF704   | 5987    | 2226       | 2.689                 | zinc finger protein 704                      |

Table S3D

**Decreased mRNA recovery in CIC-TEX-treated CD44v6kd cells**

| Symbol   | CD44v6kd | CD44v6kd<br>+TEX | v6kd:<br>v6kd+TEX | Gene Name                                                 |
|----------|----------|------------------|-------------------|-----------------------------------------------------------|
| ABHD12B  | 2244     | 1043             | 2.15              | abhydrolase domain containing 12B                         |
| ACAT2    | 2936     | 876              | 3.353             | acetyl-CoA acetyltransferase 2                            |
| ACP2     | 1264     | 578              | 2.186             | acid phosphatase 2, lysosomal                             |
| ACSS2    | 8557     | 2313             | 3.699             | acyl-CoA synthetase short-chain family member 2           |
| ADAMTS8  | 2118     | 627              | 3.38              | ADAM metalloproteinase with thrombospondin type 1 motif 8 |
| ADAMTSL2 | 3112     | 1144             | 2.721             | ADAMTS like 2                                             |
| ADI1     | 4928     | 2506             | 1.966             | acireductone dioxygenase 1                                |
| ALDH2    | 1411     | 580              | 2.435             | aldehyde dehydrogenase 2 family (mitochondrial)           |
| ALDH3A1  | 3034     | 755              | 4.019             | aldehyde dehydrogenase 3 family member A1                 |
| ALDH4A1  | 2693     | 845              | 3.186             | aldehyde dehydrogenase 4 family member A1                 |
| AMOT     | 8365     | 3113             | 2.687             | Angiomotin                                                |
| ANXA6    | 39236    | 19594            | 2.002             | annexin A6                                                |
| ANXA9    | 1002     | 422              | 2.375             | annexin A9                                                |
| APCDD1   | 37708    | 9437             | 3.996             | APC down-regulated 1                                      |
| APOBEC3G | 2836     | 1406             | 2.017             | apolipoprotein B mRNA editing enzyme catalytic subunit 3G |
| APOE     | 1179     | 314              | 3.756             | apolipoprotein E                                          |
| ARHGAP1  | 6621     | 2883             | 2.297             | Rho GTPase activating protein 1                           |
| ARHGAP18 | 3013     | 1491             | 2.021             | Rho GTPase activating protein 18                          |
| ARHGEF40 | 1592     | 582              | 2.735             | Rho guanine nucleotide exchange factor 40                 |
| ARID5A   | 2026     | 1037             | 1.953             | AT-rich interaction domain 5A                             |
| ARMC7    | 1081     | 494              | 2.186             | armadillo repeat containing 7                             |
| ASPSCR1  | 13039    | 3911             | 3.334             | ASPSCR1, UBX domain containing tether for SLC2A4          |
| ATP6V0D1 | 4912     | 1901             | 2.583             | ATPase H <sup>+</sup> transporting V0 subunit d1          |
| ATP6V0E2 | 3560     | 1238             | 2.876             | ATPase H <sup>+</sup> transporting V0 subunit e2          |
| AXIN2    | 8545     | 4220             | 2.025             | axin 2                                                    |
| BAMBI    | 9476     | 4385             | 2.161             | BMP and activin membrane bound inhibitor                  |
| BCL2L15  | 1939     | 805              | 2.41              | BCL2 like 15                                              |
| BHLHE40  | 8945     | 4339             | 2.061             | basic helix-loop-helix family member e40                  |
| BST2     | 9193     | 3602             | 2.552             | bone marrow stromal cell antigen 2                        |
| BTBD6    | 2275     | 985              | 2.31              | BTB domain containing 6                                   |
| C12orf57 | 1782     | 796              | 2.24              | chromosome 12 open reading frame 57                       |
| C14orf1  | 3625     | 1504             | 2.411             | chromosome 14 open reading frame 1                        |
| C6orf223 | 3193     | 407              | 7.851             | chromosome 6 open reading frame 223                       |
| CA6      | 1725     | 412              | 4.189             | carbonic anhydrase 6                                      |
| CALHM3   | 1289     | 470              | 2.741             | calcium homeostasis modulator 3                           |
| CASS4    | 1178     | 421              | 2.8               | Cas scaffolding protein family member 4                   |
| CCDC3    | 3544     | 826              | 4.29              | coiled-coil domain containing 3                           |
| CCDC69   | 1069     | 469              | 2.279             | coiled-coil domain containing 69                          |
| CD82     | 3368     | 1511             | 2.229             | CD82 molecule                                             |
| CD8BP    | 1654     | 583              | 2.835             | CD8b molecule pseudogene                                  |
| CDK5     | 1913     | 871              | 2.197             | cyclin dependent kinase 5                                 |
| CDKN1A   | 4082     | 1872             | 2.18              | cyclin dependent kinase inhibitor 1A                      |
| CDKN2C   | 1584     | 511              | 3.1               | cyclin dependent kinase inhibitor 2C                      |
| CDX2     | 7338     | 2543             | 2.885             | caudal type homeobox 2                                    |
| CEACAM1  | 1523     | 521              | 2.923             | carcinoembryonic antigen related cell adhesion molecule 1 |
| CEMIP    | 31231    | 15002            | 2.082             | cell migration inducing hyaluronan binding protein        |
| CHI3L1   | 4814     | 1654             | 2.911             | chitinase 3 like 1                                        |
| CHRNA3   | 5538     | 1712             | 3.235             | cholinergic receptor nicotinic alpha 3 subunit            |
| CHRNB1   | 1835     | 877              | 2.092             | cholinergic receptor nicotinic beta 1 subunit             |
| CHST14   | 1387     | 534              | 2.598             | carbohydrate sulfotransferase 14                          |
| CLU      | 20601    | 10515            | 1.959             | Clusterin                                                 |
| CPNE2    | 2742     | 1139             | 2.408             | copine 2                                                  |
| CRAT     | 10391    | 3479             | 2.987             | carnitine O-acetyltransferase                             |
| CREB3L4  | 2488     | 965              | 2.579             | cAMP responsive element binding protein 3 like 4          |

Table S3D continued

| Symbol  | CD44v6kd | CD44v6kd<br>+TEX | v6kd:<br>v6kd+TEX | Gene Name                                                   |
|---------|----------|------------------|-------------------|-------------------------------------------------------------|
| CST1    | 6792     | 623              | 10.906            | cystatin SN                                                 |
| CST3    | 9482     | 4840             | 1.959             | cystatin C                                                  |
| CTSZ    | 32292    | 11012            | 2.932             | cathepsin Z                                                 |
| CXCR4   | 2985     | 710              | 4.201             | C-X-C motif chemokine receptor 4                            |
| DBH     | 4592     | 1191             | 3.856             | dopamine beta-hydroxylase                                   |
| DBH-AS1 | 7913     | 2711             | 2.919             | DBH antisense RNA 1                                         |
| DBI     | 6889     | 3523             | 1.955             | diazepam binding inhibitor, acyl-CoA binding protein        |
| DCAF11  | 5547     | 2372             | 2.339             | DDB1 and CUL4 associated factor 11                          |
| DDAH2   | 1887     | 858              | 2.199             | dimethylarginine dimethylaminohydrolase 2                   |
| DDX58   | 2559     | 602              | 4.248             | DEXD/H-box helicase 58                                      |
| DDX60   | 4267     | 830              | 5.141             | DEXD/H-box helicase 60                                      |
| DHCR24  | 23681    | 8809             | 2.688             | 24-dehydrocholesterol reductase                             |
| DHCR7   | 7942     | 2520             | 3.151             | 7-dehydrocholesterol reductase                              |
| DHRS1   | 1573     | 766              | 2.052             | dehydrogenase/reductase 1                                   |
| DKK4    | 135196   | 53360            | 2.534             | dickkopf WNT signaling pathway inhibitor 4                  |
| DNASE1  | 2915     | 1401             | 2.081             | deoxyribonuclease I                                         |
| DYSF    | 7152     | 2500             | 2.861             | Dysferlin                                                   |
| EBP     | 4309     | 1406             | 3.065             | emopamil binding protein (sterol isomerase)                 |
| ENTPD8  | 13017    | 4268             | 3.05              | ectonucleoside triphosphate diphosphohydrolase 8            |
| FADS2   | 2244     | 798              | 2.811             | fatty acid desaturase 2                                     |
| FAM178B | 1088     | 456              | 2.384             | family with sequence similarity 178 member B                |
| FAM210B | 4509     | 1983             | 2.274             | family with sequence similarity 210 member B                |
| FAM46C  | 1996     | 571              | 3.498             | family with sequence similarity 46 member C                 |
| FAM63A  | 2766     | 1364             | 2.028             | family with sequence similarity 63 member A                 |
| FBXO2   | 2108     | 616              | 3.42              | F-box protein 2                                             |
| FBXW4   | 1680     | 855              | 1.964             | F-box and WD repeat domain containing 4                     |
| FDFT1   | 4327     | 1655             | 2.615             | farnesyl-diphosphate farnesyltransferase 1                  |
| FDPS    | 8391     | 3325             | 2.524             | farnesyl diphosphate synthase                               |
| FUCA1   | 7863     | 2500             | 3.145             | fucosidase, alpha-L- 1, tissue                              |
| FXYP6   | 1515     | 562              | 2.697             | FXYP domain containing ion transport regulator 6            |
| GALNT6  | 10950    | 5477             | 1.999             | polypeptide N-acetylgalactosaminyltransferase 6             |
| GBA     | 1834     | 799              | 2.294             | glucosylceramidase beta                                     |
| GJB1    | 9511     | 4635             | 2.052             | gap junction protein beta 1                                 |
| GLUL    | 20455    | 7662             | 2.67              | glutamate-ammonia ligase                                    |
| GMFG    | 1159     | 436              | 2.659             | glia maturation factor gamma                                |
| GPR155  | 8955     | 4578             | 1.956             | G protein-coupled receptor 155                              |
| GPX2    | 18065    | 8085             | 2.234             | glutathione peroxidase 2                                    |
| GRM8    | 1514     | 561              | 2.701             | glutamate metabotropic receptor 8                           |
| GUSB    | 5110     | 2621             | 1.95              | glucuronidase beta                                          |
| HCP5    | 1188     | 520              | 2.285             | HLA complex P5 (non-protein coding)                         |
| HELZ2   | 4314     | 2170             | 1.988             | helicase with zinc finger 2                                 |
| HMGCR   | 6319     | 2458             | 2.571             | 3-hydroxy-3-methylglutaryl-CoA reductase                    |
| HMGCS1  | 4377     | 1082             | 4.047             | 3-hydroxy-3-methylglutaryl-CoA synthase 1                   |
| HOXA11  | 1040     | 484              | 2.148             | homeobox A11                                                |
| HOXB7   | 1527     | 775              | 1.97              | homeobox B7                                                 |
| HOXB8   | 3111     | 1213             | 2.566             | homeobox B8                                                 |
| HUNK    | 13717    | 5027             | 2.729             | hormonally up-regulated Neu-associated kinase               |
| HYAL2   | 4505     | 2204             | 2.044             | hyaluronoglucosaminidase 2                                  |
| IDI1    | 2827     | 962              | 2.938             | isopentenyl-diphosphate delta isomerase 1                   |
| IFI27L2 | 1310     | 643              | 2.037             | interferon alpha inducible protein 27 like 2                |
| IFI6    | 5172     | 412              | 12.559            | interferon alpha inducible protein 6                        |
| IFIH1   | 3120     | 774              | 4.031             | interferon induced with helicase C domain 1                 |
| IFIT1   | 1751     | 296              | 5.913             | interferon induced protein with tetratricopeptide repeats 1 |
| IFIT3   | 1526     | 313              | 4.881             | interferon induced protein with tetratricopeptide repeats 3 |

Table S3D continued

| Symbol     | CD44v6kd | CD44v6kd<br>+TEX | v6kd:<br>v6kd+TEX | Gene Name                                                   |
|------------|----------|------------------|-------------------|-------------------------------------------------------------|
| IFITM3     | 12775    | 4876             | 2.62              | interferon induced transmembrane protein 3                  |
| IL17RD     | 6464     | 2986             | 2.165             | interleukin 17 receptor D                                   |
| INSIG1     | 8277     | 1642             | 5.04              | insulin induced gene 1                                      |
| INTS5      | 3627     | 1453             | 2.497             | integrator complex subunit 5                                |
| ISG15      | 11508    | 2532             | 4.545             | ISG15 ubiquitin-like modifier                               |
| JHDM1D-AS1 | 4286     | 2095             | 2.046             | JHDM1D antisense RNA 1 (head to head)                       |
| KAZALD1    | 4430     | 2212             | 2.003             | Kazal type serine peptidase inhibitor domain 1              |
| KCNJ5      | 13520    | 4235             | 3.192             | potassium voltage-gated channel subfamily J member 5        |
| KLHL25     | 1143     | 576              | 1.985             | kelch like family member 25                                 |
| KLK1       | 2772     | 1317             | 2.105             | kallikrein 1                                                |
| LINC00868  | 1466     | 423              | 3.464             | long intergenic non-protein coding RNA 868                  |
| LINC01124  | 2595     | 731              | 3.551             | long intergenic non-protein coding RNA 1124                 |
| LRRC37A16P | 3146     | 1417             | 2.22              | leucine rich repeat containing 37 member A16, pseudogene    |
| LRRC75A    | 1289     | 449              | 2.873             | leucine rich repeat containing 75A                          |
| LSS        | 6536     | 1946             | 3.359             | lanosterol synthase (2,3-oxidosqualene-lanosterol cyclase)  |
| MCTP1      | 1604     | 822              | 1.951             | multiple C2 and transmembrane domain containing 1           |
| MMAB       | 1867     | 652              | 2.863             | methylmalonic aciduria (cobalamin deficiency) cblB type     |
| MSMO1      | 3820     | 1501             | 2.545             | methylsterol monooxygenase 1                                |
| MSRB2      | 3793     | 1496             | 2.535             | methionine sulfoxide reductase B2                           |
| MSRB3      | 1579     | 760              | 2.077             | methionine sulfoxide reductase B3                           |
| MTHFR      | 1285     | 399              | 3.22              | methylenetetrahydrofolate reductase (NAD(P)H)               |
| MVD        | 3607     | 1205             | 2.994             | mevalonate diphosphate decarboxylase                        |
| MVK        | 1990     | 417              | 4.773             | mevalonate kinase                                           |
| MX1        | 1550     | 117              | 13.256            | MX dynamin like GTPase 1                                    |
| MX2        | 2187     | 519              | 4.217             | MX dynamin like GTPase 2                                    |
| MYCL       | 2108     | 929              | 2.269             | v-myc myelocytomatosis viral oncogene lung carc. homolog    |
| MYH7B      | 7607     | 2159             | 3.523             | myosin heavy chain 7B                                       |
| MYL6       | 18417    | 8288             | 2.222             | myosin light chain 6                                        |
| MYO1D      | 23131    | 10295            | 2.247             | myosin ID                                                   |
| NAT16      | 1437     | 583              | 2.463             | N-acetyltransferase 16 (putative)                           |
| Nd         | 1556     | 771              | 2.017             | ENSG00000184674                                             |
| NEDD9      | 2997     | 666              | 4.5               | neural precursor cell expressed, developm. down-regulated 9 |
| NEU1       | 1662     | 655              | 2.539             | neuraminidase 1 (lysosomal sialidase)                       |
| NEURL1B    | 2029     | 381              | 5.321             | neuralized E3 ubiquitin protein ligase 1B                   |
| NFATC4     | 1357     | 684              | 1.985             | nuclear factor of activated T-cells 4                       |
| NFE2       | 1886     | 397              | 4.756             | nuclear factor, erythroid 2                                 |
| NGFR       | 4891     | 2491             | 1.963             | nerve growth factor receptor                                |
| NKD1       | 34355    | 16133            | 2.13              | naked cuticle homolog 1                                     |
| NOTUM      | 10550    | 3935             | 2.681             | NOTUM, palmitoleoyl-protein carboxylesterase                |
| NPC2       | 4468     | 1709             | 2.614             | NPC intracellular cholesterol transporter 2                 |
| NSDHL      | 3208     | 1289             | 2.489             | NAD(P) dependent steroid dehydrogenase-like                 |
| NUCB1      | 4164     | 2044             | 2.037             | nucleobindin 1                                              |
| NUDT19     | 1863     | 904              | 2.062             | nudix hydrolase 19                                          |
| OAS1       | 3875     | 323              | 12.003            | 2'-5'-oligoadenylate synthetase 1                           |
| OAS2       | 2316     | 519              | 4.466             | 2'-5'-oligoadenylate synthetase 2                           |
| OAS3       | 12947    | 2559             | 5.06              | 2'-5'-oligoadenylate synthetase 3                           |
| OBSL1      | 7008     | 3455             | 2.029             | obscurin like 1                                             |
| OGDHL      | 1087     | 530              | 2.051             | oxoglutarate dehydrogenase-like                             |
| ORAI3      | 1703     | 527              | 3.229             | ORAI calcium release-activated calcium modulator 3          |
| PARM1      | 2457     | 1093             | 2.248             | prostate androgen-regulated mucin-like protein 1            |
| PARP10     | 1436     | 624              | 2.301             | poly(ADP-ribose) polymerase family member 10                |
| PARP9      | 3223     | 731              | 4.41              | poly(ADP-ribose) polymerase family member 9                 |
| PBXIP1     | 3670     | 1404             | 2.613             | PBX homeobox interacting protein 1                          |
| PCCA       | 8956     | 3785             | 2.366             | propionyl-CoA carboxylase alpha subunit                     |

Table S3D continued

| Symbol  | CD44v6kd | CD44v6kd<br>+TEX | v6kd:<br>v6kd+TEX | Gene Name                                                |
|---------|----------|------------------|-------------------|----------------------------------------------------------|
| PCSK9   | 7031     | 919              | 7.651             | proprotein convertase subtilisin/kexin type 9            |
| PCYT2   | 2751     | 996              | 2.761             | phosphate cytidyltransferase 2, ethanolamine             |
| PDE6D   | 1592     | 707              | 2.253             | phosphodiesterase 6D                                     |
| PHLDB2  | 1509     | 425              | 3.555             | pleckstrin homology like domain family B member 2        |
| PIK3R3  | 1108     | 380              | 2.916             | phosphoinositide-3-kinase regulatory subunit 3           |
| PLEKHA4 | 2805     | 1408             | 1.992             | pleckstrin homology domain containing A4                 |
| PLIN3   | 4356     | 2128             | 2.047             | perilipin 3                                              |
| PLSCR1  | 1790     | 671              | 2.667             | phospholipid scramblase 1                                |
| POLR1D  | 22521    | 10703            | 2.104             | RNA polymerase I subunit D                               |
| PPARD   | 6848     | 3124             | 2.192             | peroxisome proliferator activated receptor delta         |
| PPP2R2C | 7648     | 3561             | 2.148             | protein phosphatase 2 regulatory subunit Bgamma          |
| PRDX2   | 10652    | 4637             | 2.297             | peroxiredoxin 2                                          |
| PRKCDBP | 1709     | 679              | 2.518             | Protein kinase C delta binding protein                   |
| PRR5L   | 1063     | 472              | 2.254             | Proline rich 5 like                                      |
| PRSS56  | 6034     | 2872             | 2.101             | protease, serine 56                                      |
| PSG1    | 1272     | 159              | 8.006             | pregnancy specific beta-1-glycoprotein 1                 |
| PSMB9   | 1344     | 464              | 2.897             | proteasome subunit beta 9                                |
| QSOX1   | 21136    | 10172            | 2.078             | quiescin sulfhydryl oxidase 1                            |
| RAB15   | 4242     | 1102             | 3.85              | RAB15, member RAS oncogene family                        |
| RAB42   | 1313     | 500              | 2.629             | RAB42, member RAS oncogene family                        |
| RASL11B | 1087     | 524              | 2.076             | RAS like family 11 member B                              |
| RDH11   | 6646     | 3030             | 2.193             | retinol dehydrogenase 11 (all-trans/9-cis/11-cis)        |
| REEP2   | 2235     | 971              | 2.302             | receptor accessory protein 2                             |
| S100A13 | 3685     | 1685             | 2.186             | S100 calcium binding protein A13                         |
| S100A3  | 4092     | 1351             | 3.029             | S100 calcium binding protein A3                          |
| SAMHD1  | 6940     | 2391             | 2.903             | SAM and HD domain contain triphosphohydrolase 1          |
| SCARA3  | 1509     | 572              | 2.638             | scavenger receptor class A member 3                      |
| SCD     | 28071    | 7636             | 3.676             | stearoyl-CoA desaturase                                  |
| SCNN1A  | 7678     | 3692             | 2.079             | sodium channel epithelial 1 alpha subunit                |
| SEC14L2 | 1308     | 522              | 2.504             | SEC14 like lipid binding 2                               |
| SFN     | 27841    | 7711             | 3.61              | Stratifin                                                |
| SLC12A4 | 2948     | 1393             | 2.116             | solute carrier family 12 member 4                        |
| SLC1A4  | 7280     | 3180             | 2.289             | solute carrier family 1 member 4                         |
| SLC25A1 | 2442     | 1240             | 1.969             | solute carrier family 25 member 1                        |
| SLC2A6  | 1236     | 377              | 3.274             | solute carrier family 2 member 6                         |
| SLC4A8  | 1994     | 662              | 3.011             | solute carrier family 4 member 8                         |
| SLC5A1  | 1302     | 524              | 2.486             | solute carrier family 5 member 1                         |
| SLC7A8  | 28073    | 9675             | 2.902             | solute carrier family 7 member 8                         |
| SORT1   | 8271     | 3663             | 2.258             | sortilin 1                                               |
| SP5     | 4517     | 2087             | 2.164             | Sp5 transcription factor                                 |
| SPRY4   | 1991     | 925              | 2.152             | SPRY domain containing 4                                 |
| SPTB    | 3058     | 1059             | 2.888             | spectrin beta, erythrocytic                              |
| SQLE    | 6213     | 2594             | 2.395             | squalene epoxidase                                       |
| SREBF1  | 5429     | 2538             | 2.139             | sterol regulatory element binding transcription factor 1 |
| SREBF2  | 8646     | 3796             | 2.277             | sterol regulatory element binding transcription factor 2 |
| ST5     | 1712     | 833              | 2.056             | suppression of tumorigenicity 5                          |
| STARD13 | 1892     | 910              | 2.079             | StAR related lipid transfer domain containing 13         |
| STARD3  | 2942     | 1393             | 2.112             | StAR related lipid transfer domain containing 3          |
| STARD4  | 5260     | 2673             | 1.968             | StAR related lipid transfer domain containing 4          |
| STAT1   | 12986    | 4635             | 2.802             | signal transducer and activator of transcription 1       |
| STAT2   | 4200     | 1994             | 2.106             | signal transducer and activator of transcription 2       |
| SUOX    | 1410     | 477              | 2.958             | sulfite oxidase                                          |
| SV2A    | 1857     | 671              | 2.767             | synaptic vesicle glycoprotein 2A                         |
| SYK     | 31970    | 11806            | 2.708             | spleen associated tyrosine kinase                        |

Table S3D continued

| Symbol    | CD44v6kd | CD44v6kd<br>+TEX | v6kd:<br>v6kd+TEX | Gene Name                                              |
|-----------|----------|------------------|-------------------|--------------------------------------------------------|
| SYNE1     | 1139     | 438              | 2.598             | spectrin repeat containing nuclear envelope protein 1  |
| TAP1      | 2202     | 1068             | 2.062             | transporter 1, ATP binding cassette subfamily B member |
| TAS1R3    | 1146     | 547              | 2.097             | taste 1 receptor member 3                              |
| TBC1D17   | 1233     | 627              | 1.968             | TBC1 domain family member 17                           |
| TCTA      | 1085     | 364              | 2.985             | T-cell leukemia translocation altered                  |
| TDGF1     | 1273     | 533              | 2.39              | teratocarcinoma-derived growth factor 1                |
| TECR      | 3800     | 1938             | 1.961             | trans-2,3-enoyl-CoA reductase                          |
| TEF       | 1754     | 869              | 2.018             | TEF, PAR bZIP transcription factor                     |
| TGFB11    | 1148     | 433              | 2.649             | transforming growth factor beta 1 induced transcript 1 |
| TIMP1     | 13651    | 5423             | 2.517             | TIMP metalloproteinase inhibitor 1                     |
| TK1       | 6478     | 3300             | 1.963             | thymidine kinase 1                                     |
| TM7SF2    | 1933     | 620              | 3.116             | transmembrane 7 superfamily member 2                   |
| TMEM139   | 1934     | 695              | 2.782             | transmembrane protein 139                              |
| TMEM45B   | 5704     | 2498             | 2.284             | transmembrane protein 45B                              |
| TNFRSF11B | 2639     | 699              | 3.775             | TNF receptor superfamily member 11b                    |
| TNFRSF19  | 6343     | 2411             | 2.631             | TNF receptor superfamily member 19                     |
| TP53INP2  | 2468     | 1261             | 1.957             | tumor protein p53 inducible nuclear protein 2          |
| TRDC      | 1217     | 253              | 4.812             | T cell receptor delta constant                         |
| TRIM21    | 1049     | 452              | 2.318             | tripartite motif containing 21                         |
| TRIM29    | 8188     | 3601             | 2.274             | tripartite motif containing 29                         |
| TRIM69    | 1237     | 609              | 2.032             | tripartite motif containing 69                         |
| TSPAN1    | 1647     | 802              | 2.054             | tetraspanin 1                                          |
| TST       | 1544     | 787              | 1.963             | thiosulfate sulfurtransferase                          |
| TUBA1A    | 3439     | 1321             | 2.604             | tubulin alpha 1a                                       |
| UBE2L6    | 1128     | 353              | 3.192             | ubiquitin conjugating enzyme E2 L6                     |
| VAMP8     | 4193     | 2053             | 2.043             | vesicle associated membrane protein 8                  |
| VDAC3     | 9894     | 4862             | 2.035             | voltage dependent anion channel 3                      |
| VDR       | 7091     | 3213             | 2.207             | vitamin D (1,25- dihydroxyvitamin D3) receptor         |
| VEGFB     | 1822     | 843              | 2.162             | vascular endothelial growth factor B                   |
| VEPH1     | 1033     | 505              | 2.047             | ventricular zone expressed PH domain containing 1      |
| VPS18     | 1463     | 735              | 1.991             | VPS18, CORVET/HOPS core subunit                        |
| WBP1L     | 3685     | 1703             | 2.164             | WW domain binding protein 1-like                       |
| WBP2      | 7986     | 4093             | 1.951             | WW domain binding protein 2                            |
| WDR54     | 2873     | 1471             | 1.954             | WD repeat domain 54                                    |
| WNT6      | 1497     | 449              | 3.337             | Wnt family member 6                                    |
| ZBTB7C    | 1366     | 636              | 2.149             | zinc finger and BTB domain containing 7C               |
| ZDHC12    | 2123     | 1078             | 1.97              | zinc finger DHHC-type containing 12                    |
| ZNF831    | 2565     | 785              | 3.266             | zinc finger protein 831                                |



Table S3E

**Random correlation between increased mRNA recovery in CIC-TEX-treated CD44v6kd cells and higher recovery in CIC-TEX<sup>a</sup>**

| Symbol   | CIC-TEX | CD44v6kd | TEX:v6kd | Symbol  | CIC-TEX | CD44v6kd | TEX:v6kd |
|----------|---------|----------|----------|---------|---------|----------|----------|
| AASDHPT  | 1927    | 1639     | 1.18     | NAA50   | 4251    | 6623     | 0.64     |
| ABCA2    | 1481    | 3392     | 0.44     | NADK2   | 1161    | 640      | 1.81     |
| ABCA3    | 83      | 1475     | 0.06     | NAE1    | 3368    | 2976     | 1.13     |
| ABCC3    | 3547    | 1023     | 3.47     | NAMPT   | 1736    | 2289     | 0.76     |
| ABCC4    | 608     | 1081     | 0.56     | NARS    | 10362   | 4139     | 2.50     |
| ABCE1    | 2428    | 2367     | 1.03     | NARS2   | 2089    | 863      | 2.42     |
| ABL2     | 737     | 1706     | 0.43     | NBEAL2  | 2233    | 2460     | 0.91     |
| ACAP2    | 2350    | 2291     | 1.03     | NCS1    | 2372    | 509      | 4.66     |
| ACBD3    | 3615    | 1362     | 2.65     | NDC1    | 1065    | 3610     | 0.30     |
| ADGRA3   | 1137    | 809      | 1.41     | NDFIP2  | 1302    | 1330     | 0.98     |
| ADGRL1   | 593     | 1235     | 0.48     | NDUFA5  | 1691    | 892      | 1.90     |
| ADSS     | 2969    | 1121     | 2.65     | NDUFAF2 | 1164    | 455      | 2.56     |
| AEBP2    | 718     | 1052     | 0.68     | NDUFAF7 | 1194    | 909      | 1.31     |
| AGO2     | 2056    | 650      | 3.16     | NEAT1   | 2675    | 3531     | 0.76     |
| AGPS     | 2409    | 3210     | 0.75     | NEDD1   | 763     | 1460     | 0.52     |
| AGTPBP1  | 2411    | 736      | 3.28     | NEDD4   | 1740    | 1164     | 1.49     |
| AHCTF1   | 1343    | 1606     | 0.84     | NEK6    | 1672    | 462      | 3.62     |
| AHNAK2   | 773     | 1124     | 0.69     | NET1    | 133073  | 3555     | 37.43    |
| AIM1     | 1594    | 275      | 5.80     | NETO2   | 45      | 2191     | 0.02     |
| AIMP1    | 3563    | 1817     | 1.96     | NFAT5   | 676     | 4445     | 0.15     |
| AK2      | 5595    | 6100     | 0.92     | NFKB2   | 3224    | 3058     | 1.05     |
| AK3      | 2291    | 2483     | 0.92     | NFXL1   | 1493    | 782      | 1.91     |
| AKAP11   | 871     | 3369     | 0.26     | NFYB    | 1456    | 725      | 2.01     |
| AKAP12   | 1623    | 2129     | 0.76     | NGLY1   | 1347    | 790      | 1.71     |
| AKAP9    | 1907    | 4754     | 0.40     | NHLRC2  | 539     | 1604     | 0.34     |
| AKNA     | 2190    | 330      | 6.64     | NIFK    | 2270    | 1567     | 1.45     |
| AMD1     | 3108    | 3245     | 0.96     | NKTR    | 952     | 1244     | 0.77     |
| ANKRD10  | 2840    | 1788     | 1.59     | NLN     | 2899    | 1568     | 1.85     |
| ANKRD11  | 5118    | 6913     | 0.74     | NMD3    | 3493    | 3667     | 0.95     |
| ANKRD12  | 1241    | 1526     | 0.81     | NMT2    | 864     | 1174     | 0.74     |
| ANO1     | 33      | 4644     | 0.01     | NOC3L   | 1373    | 1297     | 1.06     |
| AP1AR    | 2032    | 610      | 3.33     | NOL11   | 5141    | 1736     | 2.96     |
| APPL1    | 1630    | 2352     | 0.69     | NOL4L   | 1041    | 391      | 2.66     |
| ARFGEF3  | 3035    | 1364     | 2.22     | NOL8    | 2922    | 1659     | 1.76     |
| ARGLU1   | 1827    | 1471     | 1.24     | NOL9    | 586     | 1078     | 0.54     |
| ARHGAP29 | 4090    | 1386     | 2.95     | NOLC1   | 13164   | 12943    | 1.02     |
| ARL5A    | 1158    | 2702     | 0.43     | NOP16   | 2817    | 1634     | 1.72     |
| ARL5B    | 1352    | 1318     | 1.03     | NOP58   | 6467    | 4169     | 1.55     |
| ARMC10   | 1580    | 1359     | 1.16     | NORAD   | 4399    | 10194    | 0.43     |
| ARRDC4   | 2127    | 108      | 19.70    | NPDC1   | 4074    | 1848     | 2.20     |
| ASMTL    | 1203    | 352      | 3.42     | NQO1    | 11304   | 8264     | 1.37     |
| ASNS     | 22530   | 5813     | 3.88     | NR1D1   | 1231    | 2341     | 0.53     |
| ASS1     | 10739   | 2767     | 3.88     | NRARP   | 1152    | 2203     | 0.52     |
| ASUN     | 2652    | 4550     | 0.58     | NRP1    | 217     | 1308     | 0.17     |
| ATAD1    | 1262    | 2014     | 0.63     | NSMCE4A | 2030    | 918      | 2.21     |
| ATAD3B   | 1246    | 1016     | 1.23     | NT5C3A  | 1264    | 1581     | 0.80     |
| ATE1     | 3486    | 1516     | 2.30     | NTSR1   | 3440    | 7496     | 0.46     |
| ATF3     | 4050    | 508      | 7.97     | NUDCD1  | 1250    | 1844     | 0.68     |
| ATG12    | 1349    | 2117     | 0.64     | NUFIP2  | 2461    | 2818     | 0.87     |
| ATP11A   | 525     | 3036     | 0.17     | NUP155  | 1385    | 3519     | 0.39     |
| ATP13A3  | 2866    | 5803     | 0.49     | NUP160  | 2720    | 3407     | 0.80     |
| ATR      | 1434    | 2584     | 0.55     | NUP210  | 779     | 6451     | 0.12     |
| ATXN2    | 1251    | 1309     | 0.96     | NUP35   | 893     | 1260     | 0.71     |
| BAG2     | 1783    | 1348     | 1.32     | NUP43   | 704     | 1185     | 0.59     |
| BAZ1A    | 1625    | 2091     | 0.78     | NUP58   | 2723    | 5330     | 0.51     |
| BBX      | 1719    | 2179     | 0.79     | ODC1    | 34704   | 6478     | 5.36     |
| BDP1     | 1316    | 1603     | 0.82     | OGT     | 3558    | 4423     | 0.80     |
| BET1     | 1564    | 810      | 1.93     | OPA1    | 5428    | 5473     | 0.99     |
| BMI1     | 1444    | 511      | 2.83     | ORC2    | 1507    | 2485     | 0.61     |
| BRCA2    | 273     | 1525     | 0.18     | ORC6    | 1220    | 1518     | 0.80     |

Table S3E continued

| Symbol   | CIC-TEX | CD44v6kd | TEX:v6kd | Symbol     | CIC-TEX | CD44v6kd | TEX:v6kd |
|----------|---------|----------|----------|------------|---------|----------|----------|
| BRIX1    | 2206    | 1354     | 1.63     | OSBPL1A    | 1166    | 1234     | 0.94     |
| BROX     | 1383    | 1910     | 0.72     | OSBPL8     | 1684    | 2539     | 0.66     |
| BRWD1    | 1430    | 2618     | 0.55     | OSGIN1     | 1788    | 449      | 3.98     |
| BTAF1    | 1656    | 2307     | 0.72     | OTUD6B-AS1 | 1881    | 764      | 2.46     |
| BTG3     | 1288    | 2190     | 0.59     | PABPC1L    | 1298    | 684      | 1.90     |
| C10orf2  | 2897    | 1536     | 1.89     | PANK3      | 2862    | 3612     | 0.79     |
| C11orf68 | 2350    | 1308     | 1.80     | PAWR       | 2345    | 2382     | 0.98     |
| C12orf45 | 1623    | 317      | 5.12     | PAX8-AS1   | 761     | 2636     | 0.29     |
| C1GALT1  | 669     | 1510     | 0.44     | PAXBPA1    | 846     | 1829     | 0.46     |
| C1orf52  | 1630    | 525      | 3.11     | PCID2      | 2993    | 1518     | 1.97     |
| C21orf91 | 226     | 1013     | 0.22     | PDCD11     | 4006    | 3420     | 1.17     |
| C2orf69  | 415     | 1203     | 0.34     | PFDN2      | 8384    | 2354     | 3.56     |
| C5orf24  | 1112    | 2717     | 0.41     | PHIP       | 716     | 2421     | 0.30     |
| C5orf30  | 461     | 1033     | 0.45     | PHKA1      | 1302    | 947      | 1.37     |
| C6orf48  | 11384   | 2450     | 4.65     | PHLDA2     | 8933    | 585      | 15.27    |
| CABLES1  | 2849    | 331      | 8.61     | PIEZO1     | 1747    | 7607     | 0.23     |
| CAMKK2   | 1931    | 1154     | 1.67     | PIK3CA     | 1095    | 1354     | 0.81     |
| CAMSAP1  | 4229    | 3502     | 1.21     | PIM3       | 3377    | 1732     | 1.95     |
| CAPN15   | 2195    | 2085     | 1.05     | PIP4K2A    | 1088    | 1362     | 0.80     |
| CAPRN2   | 4241    | 631      | 6.72     | PKD1       | 542     | 1136     | 0.48     |
| CASC4    | 2211    | 1774     | 1.25     | PKN2       | 1309    | 2949     | 0.44     |
| CASP8    | 1568    | 376      | 4.17     | PLA2G12A   | 2355    | 1293     | 1.82     |
| CAV2     | 1003    | 459      | 2.18     | PLD1       | 593     | 1192     | 0.50     |
| CBFB     | 2461    | 5971     | 0.41     | PLK2       | 3599    | 468      | 7.69     |
| CBS/CBSL | 38      | 1946     | 0.02     | PLS1       | 2756    | 3406     | 0.81     |
| CBX2     | 815     | 1511     | 0.54     | PLXNA1     | 918     | 4199     | 0.22     |
| CCAR1    | 4686    | 3558     | 1.32     | PLXND1     | 2162    | 1173     | 1.84     |
| CCDC14   | 1045    | 1242     | 0.84     | PM20D2     | 620     | 1715     | 0.36     |
| CCDC57   | 2781    | 1083     | 2.57     | PMAIP1     | 574     | 1309     | 0.44     |
| CCDC58   | 1053    | 502      | 2.10     | PMEPA1     | 1187    | 1371     | 0.87     |
| CCDC59   | 2560    | 823      | 3.11     | PNISR      | 1295    | 1610     | 0.80     |
| CCDC88A  | 205     | 3077     | 0.07     | PNN        | 8108    | 4326     | 1.87     |
| CCDC91   | 2259    | 382      | 5.91     | PNO1       | 1960    | 1561     | 1.26     |
| CCNB1IP1 | 6624    | 1995     | 3.32     | PNPT1      | 2390    | 3660     | 0.65     |
| CCNC     | 2673    | 2119     | 1.26     | PODXL      | 638     | 1310     | 0.49     |
| CCND2    | 35      | 1747     | 0.02     | POLQ       | 400     | 1073     | 0.37     |
| CCNL1    | 2506    | 1820     | 1.38     | POLR1B     | 1554    | 2919     | 0.53     |
| CCNL2    | 1161    | 4122     | 0.28     | POLR3D     | 1107    | 872      | 1.27     |
| CCNT2    | 395     | 1194     | 0.33     | POLR3E     | 2597    | 1519     | 1.71     |
| CD164    | 2484    | 5261     | 0.47     | POT1       | 937     | 1119     | 0.84     |
| CD2AP    | 2876    | 2325     | 1.24     | PPAT       | 1816    | 1805     | 1.01     |
| CD55     | 3217    | 283      | 11.37    | PPID       | 2571    | 1613     | 1.59     |
| CDC25A   | 631     | 1872     | 0.34     | PPIG       | 2819    | 3465     | 0.81     |
| CDC42EP1 | 7020    | 178      | 39.44    | PPIL4      | 1774    | 1033     | 1.72     |
| CDC47    | 2541    | 3021     | 0.84     | PPIP5K2    | 739     | 3006     | 0.25     |
| CDK6     | 1656    | 3158     | 0.52     | PPP1CB     | 3992    | 5742     | 0.70     |
| CEBPB    | 3509    | 764      | 4.59     | PPP1R15A   | 8353    | 3045     | 2.74     |
| CEBPG    | 9321    | 1899     | 4.91     | PPP1R2     | 1853    | 4203     | 0.44     |
| CEBPZ    | 3857    | 2855     | 1.35     | PPP3CA     | 1635    | 1433     | 1.14     |
| CELF1    | 2675    | 4882     | 0.55     | PPP4R2     | 1112    | 1700     | 0.65     |
| CENPJ    | 422     | 1438     | 0.29     | PPRC1      | 2000    | 2471     | 0.81     |
| CENPV    | 1206    | 1014     | 1.19     | PPTC7      | 1316    | 1068     | 1.23     |
| CEP120   | 702     | 1827     | 0.38     | PREPL      | 2857    | 2594     | 1.10     |
| CEP170   | 400     | 1142     | 0.35     | PRKAA1     | 2918    | 1966     | 1.48     |
| CEP170B  | 2923    | 3044     | 0.96     | PRKAA2     | 30      | 1925     | 0.02     |
| CEP95    | 2496    | 656      | 3.80     | PRKAB2     | 959     | 2761     | 0.35     |
| CFAP97   | 2562    | 3123     | 0.82     | PRKCI      | 3711    | 2755     | 1.35     |
| CHCHD4   | 1326    | 338      | 3.92     | PRKDC      | 3141    | 21757    | 0.14     |
| CHD1     | 2025    | 4369     | 0.46     | PRMT3      | 1408    | 1555     | 0.91     |
| CHD7     | 2093    | 3361     | 0.62     | PRPF38B    | 5252    | 2509     | 2.09     |
| CHMP2B   | 1138    | 1572     | 0.72     | PRPF40A    | 4576    | 6698     | 0.68     |
| CHORDC1  | 1121    | 864      | 1.30     | PRPF4B     | 1802    | 2462     | 0.73     |

Table S3E continued

| Symbol     | CIC-TEX | CD44v6kd | TEX:v6kd | Symbol   | CIC-TEX | CD44v6kd | TEX:v6kd |
|------------|---------|----------|----------|----------|---------|----------|----------|
| CHUK       | 1997    | 1298     | 1.54     | PRPS2    | 777     | 1332     | 0.58     |
| CLASP2     | 907     | 1528     | 0.59     | PRRC2C   | 2621    | 10028    | 0.26     |
| CLK1       | 2207    | 1589     | 1.39     | PSAT1    | 15152   | 6706     | 2.26     |
| CLNS1A     | 16000   | 3222     | 4.97     | PSMD12   | 6630    | 3126     | 2.12     |
| CLPX       | 3245    | 2284     | 1.42     | PTAR1    | 1069    | 4806     | 0.22     |
| CLUH       | 5277    | 4219     | 1.25     | PTER     | 504     | 1185     | 0.43     |
| CMPK1      | 8172    | 2517     | 3.25     | PTPDC1   | 1660    | 527      | 3.15     |
| CMTM4      | 4590    | 2831     | 1.62     | PTPN11   | 9618    | 4262     | 2.26     |
| CMTR2      | 1587    | 1265     | 1.25     | PTPN2    | 4364    | 1624     | 2.69     |
| CNBP       | 22773   | 12576    | 1.81     | PTPRF    | 3273    | 3192     | 1.03     |
| CNTRL      | 1335    | 496      | 2.69     | PUM2     | 5138    | 6530     | 0.79     |
| COG5       | 2166    | 2944     | 0.74     | PUM3     | 2312    | 1473     | 1.57     |
| COL16A1    | 1307    | 379      | 3.45     | PUS1     | 1999    | 606      | 3.30     |
| COL6A1     | 269     | 2575     | 0.10     | PUS7     | 2056    | 1950     | 1.05     |
| COMTD1     | 1343    | 349      | 3.85     | PVR      | 1992    | 2873     | 0.69     |
| COX11      | 1529    | 1162     | 1.32     | QKI      | 115     | 1057     | 0.11     |
| CPT1A      | 1361    | 5499     | 0.25     | QSER1    | 1625    | 2521     | 0.64     |
| CREBZF     | 1861    | 1230     | 1.51     | R3HDM4   | 4444    | 1926     | 2.31     |
| CTDSPL2    | 1173    | 1533     | 0.77     | RAB12    | 1055    | 869      | 1.21     |
| CUL4A      | 6975    | 3014     | 2.31     | RAB14    | 3639    | 3569     | 1.02     |
| CUL5       | 1338    | 1910     | 0.70     | RAB5A    | 2296    | 1298     | 1.77     |
| CYCS       | 4639    | 5780     | 0.80     | RABEP1   | 4232    | 2669     | 1.59     |
| DCAF13     | 4230    | 3006     | 1.41     | RABGGTB  | 8200    | 2625     | 3.12     |
| DCBLD2     | 2303    | 3053     | 0.75     | RAD23B   | 9769    | 8564     | 1.14     |
| DCP2       | 944     | 1784     | 0.53     | RAD50    | 2146    | 2695     | 0.80     |
| DCUN1D1    | 1382    | 1292     | 1.07     | RAI14    | 5005    | 1169     | 4.28     |
| DCUN1D4    | 1051    | 722      | 1.46     | RAP1GAP2 | 1858    | 1277     | 1.45     |
| DCUN1D5    | 2610    | 1808     | 1.44     | RAP2A    | 892     | 1180     | 0.76     |
| DDIT3      | 12242   | 634      | 19.31    | RB1CC1   | 3127    | 3691     | 0.85     |
| DDIT4      | 3629    | 1933     | 1.88     | RBAK     | 433     | 1243     | 0.35     |
| DDX10      | 3372    | 1770     | 1.90     | RBBP8    | 3850    | 2694     | 1.43     |
| DDX11      | 1489    | 784      | 1.90     | RBM19    | 1455    | 902      | 1.61     |
| DDX17      | 5748    | 11228    | 0.51     | RBM25    | 7899    | 4560     | 1.73     |
| DDX21      | 13974   | 8676     | 1.61     | RBM26    | 1399    | 1832     | 0.76     |
| DDX39B     | 607     | 1080     | 0.56     | RBM27    | 1123    | 4717     | 0.24     |
| DDX55      | 1373    | 871      | 1.58     | RBM28    | 2442    | 2069     | 1.18     |
| DEK        | 5136    | 7986     | 0.64     | RBM39    | 9156    | 6346     | 1.44     |
| DFFA       | 1627    | 3712     | 0.44     | RCN2     | 2524    | 1717     | 1.47     |
| DGKD       | 2478    | 1289     | 1.92     | REEP3    | 1284    | 1979     | 0.65     |
| DGKH       | 720     | 2233     | 0.32     | RELB     | 1629    | 558      | 2.92     |
| DHX33      | 1611    | 2732     | 0.59     | RFC3     | 1118    | 3046     | 0.37     |
| DICER1     | 737     | 2766     | 0.27     | RFC4     | 2070    | 2163     | 0.96     |
| DIMT1      | 1086    | 1306     | 0.83     | RFK      | 1076    | 1043     | 1.03     |
| DIS3       | 2831    | 2156     | 1.31     | RHPN1    | 1093    | 654      | 1.67     |
| DKC1       | 16468   | 6778     | 2.43     | RICTOR   | 657     | 1044     | 0.63     |
| DLGAP1-AS2 | 1326    | 2430     | 0.55     | RIDA     | 1043    | 552      | 1.89     |
| DMTF1      | 1557    | 1688     | 0.92     | RIF1     | 872     | 4250     | 0.21     |
| DNAJA4     | 1323    | 641      | 2.06     | RINT1    | 826     | 1793     | 0.46     |
| DNAJC10    | 7532    | 5013     | 1.50     | RLIM     | 2117    | 3119     | 0.68     |
| DNAJC2     | 2504    | 2044     | 1.23     | RNF149   | 410     | 1423     | 0.29     |
| DNTTIP2    | 3858    | 3192     | 1.21     | RNGTT    | 586     | 1149     | 0.51     |
| DOCK5      | 539     | 1415     | 0.38     | RPAP3    | 1556    | 2341     | 0.66     |
| DOCK6      | 1434    | 435      | 3.30     | RPE      | 1917    | 2155     | 0.89     |
| DOT1L      | 947     | 1179     | 0.80     | RPF2     | 2249    | 1161     | 1.94     |
| DPY19L1    | 415     | 1976     | 0.21     | RPIA     | 1910    | 1027     | 1.86     |
| DSCC1      | 1795    | 949      | 1.89     | RPL22L1  | 15234   | 832      | 18.31    |
| DST        | 28133   | 1300     | 21.64    | RPRD1A   | 2146    | 1572     | 1.37     |
| DUS1L      | 6740    | 2863     | 2.35     | RPS6KA3  | 5018    | 2222     | 2.26     |
| DUSP5      | 2612    | 3367     | 0.78     | RPS6KB1  | 1229    | 606      | 2.03     |
| DVL1       | 3817    | 4848     | 0.79     | RRAS2    | 1239    | 428      | 2.90     |
| DYNLT3     | 1498    | 714      | 2.10     | RRP1B    | 2070    | 7058     | 0.29     |
| DYRK2      | 1173    | 696      | 1.69     | RSL1D1   | 15190   | 7869     | 1.93     |

Table S3E continued

| Symbol       | CIC-TEX | CD44v6kd | TEX:v6kd | Symbol   | CIC-TEX | CD44v6kd | TEX:v6kd |
|--------------|---------|----------|----------|----------|---------|----------|----------|
| EDEM3        | 464     | 1139     | 0.41     | RSL24D1  | 10273   | 2532     | 4.06     |
| EEA1         | 1354    | 485      | 2.79     | RSRC2    | 4423    | 2127     | 2.08     |
| EIF1AX       | 3377    | 1185     | 2.85     | RSRP1    | 574     | 1096     | 0.52     |
| EIF3J        | 8739    | 2929     | 2.98     | SACS     | 379     | 3533     | 0.11     |
| EIF4A2       | 25620   | 7489     | 3.42     | SAMD8    | 509     | 1405     | 0.36     |
| EIF4EBP1     | 5407    | 2180     | 2.48     | SAT1     | 10687   | 4870     | 2.19     |
| ELK4         | 662     | 2574     | 0.26     | SATB1    | 1589    | 332      | 4.78     |
| EMP1         | 600     | 1511     | 0.40     | SATB2    | 249     | 1375     | 0.18     |
| ENAH         | 4856    | 3202     | 1.52     | SBDS     | 4498    | 3246     | 1.39     |
| EP400        | 1726    | 2119     | 0.81     | SBNO1    | 4150    | 2403     | 1.73     |
| EPB41L4A-AS1 | 4712    | 692      | 6.81     | SBNO2    | 1510    | 1276     | 1.18     |
| EPB41L4B     | 1498    | 794      | 1.89     | SCAMP1   | 433     | 1253     | 0.35     |
| EPRS         | 15524   | 12744    | 1.22     | SCFD1    | 2677    | 1802     | 1.49     |
| EPS15        | 2889    | 1285     | 2.25     | SCOC     | 2579    | 1093     | 2.36     |
| EPT1         | 886     | 4951     | 0.18     | SCRIB    | 4920    | 3495     | 1.41     |
| ERGIC2       | 1841    | 1299     | 1.42     | SDC4     | 1476    | 7053     | 0.21     |
| ERN1         | 1032    | 927      | 1.11     | SDE2     | 1147    | 1303     | 0.88     |
| ERO1A        | 1076    | 5034     | 0.21     | SDHD     | 1323    | 1061     | 1.25     |
| ERRFI1       | 5146    | 3241     | 1.59     | SEC63    | 1781    | 2538     | 0.70     |
| ESCO1        | 1203    | 1315     | 0.91     | SEH1L    | 5942    | 3852     | 1.54     |
| ESF1         | 4163    | 813      | 5.12     | SERBP1   | 11619   | 9788     | 1.19     |
| ESRRA        | 4998    | 1582     | 3.16     | SERPINE1 | 259     | 13639    | 0.02     |
| EV15         | 1027    | 465      | 2.21     | SERTAD2  | 1055    | 1548     | 0.68     |
| EXOC6        | 1095    | 1687     | 0.65     | SET      | 20976   | 15220    | 1.38     |
| EXOSC7       | 1705    | 1053     | 1.62     | SETD6    | 1187    | 566      | 2.10     |
| FAM107B      | 6924    | 972      | 7.12     | SETD7    | 4296    | 2822     | 1.52     |
| FAM122B      | 1912    | 3808     | 0.50     | SF3B6    | 10692   | 4993     | 2.14     |
| FAM129A      | 4449    | 122      | 36.47    | SFXN4    | 2711    | 927      | 2.92     |
| FAM135A      | 1472    | 394      | 3.74     | SH3BGRL2 | 1093    | 446      | 2.45     |
| FAM171A1     | 1244    | 594      | 2.09     | SH3BP2   | 1792    | 1663     | 1.08     |
| FAM208A      | 1940    | 4003     | 0.48     | SH3D19   | 3469    | 1609     | 2.16     |
| FAM208B      | 2091    | 2276     | 0.92     | SH3YL1   | 4208    | 930      | 4.52     |
| FAM210A      | 1248    | 1009     | 1.24     | SHTN1    | 2166    | 2140     | 1.01     |
| FAM35A       | 1041    | 675      | 1.54     | SHKE1    | 1696    | 1163     | 1.46     |
| FAM60A       | 5463    | 2818     | 1.94     | SIPA1L2  | 1552    | 419      | 3.70     |
| FAM84B       | 7075    | 1519     | 4.66     | SIX4     | 184     | 2026     | 0.09     |
| FAM91A1      | 4103    | 1774     | 2.31     | SKIL     | 1910    | 1775     | 1.08     |
| FAR1         | 2355    | 2786     | 0.85     | SLC12A7  | 1425    | 5885     | 0.24     |
| FARP2        | 1399    | 1461     | 0.96     | SLC16A6  | 23      | 2370     | 0.01     |
| FASTKD2      | 1083    | 2081     | 0.52     | SLC17A9  | 1243    | 1934     | 0.64     |
| FBRSL1       | 1957    | 1094     | 1.79     | SLC20A1  | 944     | 7097     | 0.13     |
| FBXO41       | 1945    | 1906     | 1.02     | SLC25A22 | 2988    | 1143     | 2.61     |
| FBXO45       | 2023    | 1425     | 1.42     | SLC25A32 | 1425    | 1074     | 1.33     |
| FEM1B        | 1773    | 1414     | 1.25     | SLC25A36 | 3770    | 2683     | 1.41     |
| FEM1C        | 773     | 1311     | 0.59     | SLC35F2  | 1748    | 1219     | 1.43     |
| FERMT1       | 8024    | 2414     | 3.32     | SLC38A1  | 7051    | 17988    | 0.39     |
| FGFR1OP2     | 1448    | 1628     | 0.89     | SLC38A2  | 3200    | 10038    | 0.32     |
| FGFR4        | 1747    | 533      | 3.28     | SLC39A10 | 341     | 1664     | 0.20     |
| FIGNL1       | 403     | 1628     | 0.25     | SLC39A4  | 1947    | 672      | 2.90     |
| FKBP4        | 6978    | 7820     | 0.89     | SLC39A6  | 641     | 2005     | 0.32     |
| FLNA         | 15950   | 86124    | 0.19     | SLC43A1  | 3900    | 994      | 3.92     |
| FMNL2        | 1724    | 2008     | 0.86     | SLC43A3  | 130     | 1308     | 0.10     |
| FNBP4        | 2386    | 1982     | 1.20     | SLC44A2  | 1010    | 816      | 1.24     |
| FNDC3A       | 3224    | 3454     | 0.93     | SLC6A6   | 577     | 2142     | 0.27     |
| FOSL1        | 2809    | 1914     | 1.47     | SLC6A8   | 4684    | 2630     | 1.78     |
| FOXK1        | 949     | 4305     | 0.22     | SLC7A1   | 3525    | 10935    | 0.32     |
| FRMD5        | 1566    | 847      | 1.85     | SLC7A11  | 1611    | 274      | 5.88     |
| G2E3         | 365     | 1431     | 0.26     | SLFN5    | 2287    | 691      | 3.31     |
| GAB2         | 2367    | 292      | 8.11     | SLIRP    | 3081    | 2662     | 1.16     |
| GALT         | 4218    | 3676     | 1.15     | SLMAP    | 2852    | 2206     | 1.29     |
| GAN          | 408     | 1053     | 0.39     | SLTM     | 9091    | 3375     | 2.69     |
| GART         | 4847    | 10960    | 0.44     | SMAD5    | 1505    | 4561     | 0.33     |

Table S3E continued

| Symbol    | CIC-TEX | CD44v6kd | TEX:v6kd | Symbol     | CIC-TEX | CD44v6kd | TEX:v6kd |
|-----------|---------|----------|----------|------------|---------|----------|----------|
| GAS5      | 33726   | 5263     | 6.41     | SMARCAD1   | 1509    | 1427     | 1.06     |
| GATAD2A   | 3309    | 2862     | 1.16     | SMC3       | 4265    | 5050     | 0.84     |
| GCC2      | 1960    | 1839     | 1.07     | SMC5       | 1330    | 1620     | 0.82     |
| GCLC      | 4086    | 1541     | 2.65     | SMC6       | 1158    | 1864     | 0.62     |
| GCLM      | 951     | 1261     | 0.75     | SMCHD1     | 3556    | 3435     | 1.04     |
| GDF15     | 6382    | 1592     | 4.01     | SMG1       | 2324    | 3808     | 0.61     |
| GEMIN5    | 846     | 2369     | 0.36     | SMIM15     | 1707    | 1152     | 1.48     |
| GFPT1     | 14575   | 5195     | 2.81     | SMIM20     | 3683    | 509      | 7.24     |
| GJB3      | 754     | 1537     | 0.49     | SMS        | 4625    | 1728     | 2.68     |
| GLO1      | 6677    | 6344     | 1.05     | SNAPC4     | 1076    | 969      | 1.11     |
| GMFB      | 1349    | 1772     | 0.76     | SNHG1      | 11994   | 1852     | 6.48     |
| GNB1L     | 3130    | 406      | 7.71     | SNHG12     | 1194    | 326      | 3.66     |
| GNG12     | 5928    | 3833     | 1.55     | SNHG15     | 2656    | 1003     | 2.65     |
| GNL2      | 5826    | 3606     | 1.62     | SNHG17     | 1755    | 701      | 2.50     |
| GNL3      | 6365    | 2381     | 2.67     | SNHG19     | 2211    | 563      | 3.93     |
| GOLGA4    | 5953    | 3752     | 1.59     | SNHG8      | 19650   | 1028     | 19.11    |
| GOLT1B    | 869     | 1204     | 0.72     | SNX10      | 549     | 1773     | 0.31     |
| GPD2      | 935     | 3464     | 0.27     | SNX4       | 1187    | 1033     | 1.15     |
| GPN3      | 1210    | 1046     | 1.16     | SOCS4      | 605     | 2180     | 0.28     |
| GPRC5A    | 3384    | 623      | 5.43     | SOWAHC     | 730     | 1207     | 0.60     |
| GPSM1     | 1333    | 421      | 3.17     | SOX4       | 3146    | 1195     | 2.63     |
| GRB10     | 4534    | 179      | 25.33    | SPCS3      | 1175    | 3265     | 0.36     |
| GRPEL2    | 1114    | 1377     | 0.81     | SPIRE1     | 4328    | 1101     | 3.93     |
| GSAP      | 619     | 1144     | 0.54     | SPNS2      | 6695    | 1566     | 4.28     |
| GSR       | 3094    | 3503     | 0.88     | SPOPL      | 560     | 1405     | 0.40     |
| GSTP1     | 35506   | 959      | 37.02    | SPTBN2     | 1768    | 3017     | 0.59     |
| GTF2F2    | 3255    | 2414     | 1.35     | SQSTM1     | 20854   | 7440     | 2.80     |
| GTF2H3    | 2259    | 1367     | 1.65     | SREK1      | 2263    | 2099     | 1.08     |
| GTF3C4    | 2004    | 4154     | 0.48     | SREK1IP1   | 1159    | 700      | 1.66     |
| GTPBP4    | 5984    | 2675     | 2.24     | SRP9       | 3544    | 3781     | 0.94     |
| GUF1      | 1931    | 1213     | 1.59     | SRPK1      | 3313    | 3884     | 0.85     |
| HAUS6     | 454     | 1403     | 0.32     | SRRM1      | 1662    | 2679     | 0.62     |
| HDDC2     | 3907    | 802      | 4.87     | SRSF1      | 10160   | 9122     | 1.11     |
| HEATR1    | 1747    | 3031     | 0.58     | SRSF11     | 4613    | 4649     | 0.99     |
| HGS       | 3174    | 2964     | 1.07     | SRSF5      | 5285    | 4918     | 1.07     |
| HK2       | 2079    | 1711     | 1.22     | SSB        | 6276    | 5443     | 1.15     |
| HMGA1     | 37164   | 23082    | 1.61     | SSR1       | 2637    | 3568     | 0.74     |
| HNRNPDL   | 8139    | 5444     | 1.50     | SSX2IP     | 1352    | 1534     | 0.88     |
| HOOK1     | 3360    | 2913     | 1.15     | ST6GALNAC4 | 3177    | 1372     | 2.32     |
| HPCAL1    | 4411    | 2101     | 2.10     | STC2       | 19      | 4816     | 0.00     |
| HPRT1     | 3003    | 3578     | 0.84     | STEAP2     | 236     | 1014     | 0.23     |
| HS2ST1    | 1253    | 2013     | 0.62     | STK26      | 2525    | 2998     | 0.84     |
| HSPA13    | 509     | 2612     | 0.19     | STK32C     | 2252    | 466      | 4.83     |
| HSPA1A/1B | 1644    | 765      | 2.15     | STRN3      | 567     | 1070     | 0.53     |
| HSPA4L    | 1239    | 2094     | 0.59     | STX1A      | 2025    | 371      | 5.46     |
| HSPA9     | 24871   | 15327    | 1.62     | STXBP3     | 1575    | 1137     | 1.39     |
| HSPD1     | 33648   | 29489    | 1.14     | SULF2      | 155     | 2160     | 0.07     |
| HSPH1     | 8443    | 16435    | 0.51     | SUN1       | 944     | 10481    | 0.09     |
| IARS      | 24534   | 10051    | 2.44     | SUPV3L1    | 2781    | 1345     | 2.07     |
| IBTK      | 3471    | 2349     | 1.48     | SVIL       | 1095    | 282      | 3.88     |
| IFRD1     | 4998    | 4335     | 1.15     | TAF13      | 1128    | 575      | 1.96     |
| IFT88     | 1257    | 831      | 1.51     | TAF1C      | 720     | 1045     | 0.69     |
| IGF2BP2   | 3495    | 2120     | 1.65     | TAF1D      | 9978    | 2204     | 4.53     |
| IMPA1     | 612     | 1288     | 0.48     | TANC2      | 914     | 1448     | 0.63     |
| IMPACT    | 1689    | 1142     | 1.48     | TATDN1     | 3954    | 455      | 8.69     |
| IMPAD1    | 1757    | 3423     | 0.51     | TAX1BP3    | 779     | 1012     | 0.77     |
| INO80D    | 375     | 1131     | 0.33     | TBC1D15    | 2604    | 864      | 3.01     |
| IQCB1     | 1693    | 1109     | 1.53     | TBC1D30    | 1503    | 442      | 3.40     |
| ISCU      | 4418    | 1191     | 3.71     | TBC1D4     | 1385    | 1825     | 0.76     |
| ITGA6     | 2454    | 13205    | 0.19     | TBK1       | 2089    | 905      | 2.31     |
| ITGB1     | 2847    | 6126     | 0.46     | TBL1XR1    | 5103    | 4826     | 1.06     |
| ITGB3BP   | 1191    | 720      | 1.65     | TC2N       | 1602    | 1176     | 1.36     |

Table S3E continued

| Symbol    | CIC-TEX | CD44v6kd | TEX:v6kd | Symbol    | CIC-TEX | CD44v6kd | TEX:v6kd |
|-----------|---------|----------|----------|-----------|---------|----------|----------|
| ITM2C     | 3646    | 1805     | 2.02     | TCEA1     | 4769    | 1634     | 2.92     |
| IVNS1ABP  | 4684    | 3451     | 1.36     | TCERG1    | 2171    | 4604     | 0.47     |
| JAG1      | 322     | 2135     | 0.15     | TCF3      | 6147    | 4285     | 1.43     |
| JMJD1C    | 2604    | 2724     | 0.96     | TCOF1     | 2548    | 9059     | 0.28     |
| JMY       | 1102    | 979      | 1.13     | TFAP4     | 1265    | 692      | 1.83     |
| JUN       | 4971    | 1016     | 4.89     | THAP12    | 2383    | 876      | 2.72     |
| JUNB      | 2836    | 827      | 3.43     | THAP9-AS1 | 2607    | 694      | 3.76     |
| KATNB1    | 2701    | 1897     | 1.42     | THOC1     | 1448    | 1148     | 1.26     |
| KDM6B     | 1413    | 1183     | 1.19     | THOC2     | 3015    | 5181     | 0.58     |
| KDSR      | 687     | 1086     | 0.63     | TIA1      | 1048    | 1389     | 0.75     |
| KIAA0753  | 1305    | 811      | 1.61     | TIMM17A   | 3485    | 2959     | 1.18     |
| KIAA0907  | 1387    | 2543     | 0.55     | TIMM44    | 4096    | 1353     | 3.03     |
| KIAA0930  | 2871    | 1324     | 2.17     | TINAGL1   | 2324    | 5036     | 0.46     |
| KIAA1549  | 631     | 1057     | 0.60     | TM4SF1    | 5370    | 2311     | 2.32     |
| KIAA1551  | 2141    | 556      | 3.85     | TMED5     | 1481    | 2048     | 0.72     |
| KIAA1804  | 874     | 1032     | 0.85     | TMED7     | 662     | 2066     | 0.32     |
| KIAA1958  | 530     | 1308     | 0.41     | TMEM126B  | 3287    | 1123     | 2.93     |
| KIF20B    | 535     | 4265     | 0.13     | TMEM167A  | 3028    | 1840     | 1.65     |
| KIF21A    | 3789    | 913      | 4.15     | TMEM170A  | 740     | 1275     | 0.58     |
| KIF3A     | 452     | 1130     | 0.40     | TMEM181   | 791     | 1602     | 0.49     |
| KIFC3     | 3871    | 1401     | 2.76     | TMEM209   | 306     | 1683     | 0.18     |
| KLF4      | 2075    | 344      | 6.03     | TMEM259   | 1406    | 2314     | 0.61     |
| KLF5      | 7063    | 3083     | 2.29     | TMEM263   | 1922    | 712      | 2.70     |
| KLF6      | 2981    | 1730     | 1.72     | TMEM33    | 1444    | 2036     | 0.71     |
| KMT2A     | 2423    | 4883     | 0.50     | TMEM38B   | 488     | 1442     | 0.34     |
| KNTC1     | 542     | 2416     | 0.22     | TMEM65    | 1046    | 291      | 3.60     |
| KRAS      | 2504    | 4675     | 0.54     | TMF1      | 1516    | 1323     | 1.15     |
| LACTB2    | 1383    | 672      | 2.06     | TNC       | 718     | 7020     | 0.10     |
| LAMA5     | 1236    | 8158     | 0.15     | TNFRSF10D | 262     | 2404     | 0.11     |
| LAMB3     | 2849    | 1517     | 1.88     | TNFRSF12A | 7897    | 4988     | 1.58     |
| LAPTM4B   | 2287    | 5128     | 0.45     | TNFRSF21  | 2902    | 648      | 4.48     |
| LARP1B    | 3532    | 1013     | 3.49     | TNKS2     | 3078    | 3287     | 0.94     |
| LARP4     | 1933    | 3717     | 0.52     | TNPO1     | 3692    | 5561     | 0.66     |
| LARS      | 3127    | 10215    | 0.31     | TNRC6A    | 794     | 1777     | 0.45     |
| LBR       | 627     | 5372     | 0.12     | TPD52     | 3577    | 3004     | 1.19     |
| LCLAT1    | 219     | 1148     | 0.19     | TPP2      | 2602    | 2733     | 0.95     |
| LCOR      | 794     | 1174     | 0.68     | TRABD     | 1987    | 1070     | 1.86     |
| LENG8     | 973     | 2506     | 0.39     | TRAP1     | 5847    | 4135     | 1.41     |
| LHFPL2    | 541     | 1140     | 0.47     | TRAPPC8   | 1102    | 752      | 1.47     |
| LIF       | 528     | 1401     | 0.38     | TRIB3     | 28178   | 2258     | 12.48    |
| LIG3      | 3857    | 680      | 5.67     | TRIM65    | 1027    | 1326     | 0.77     |
| LIN7C     | 1298    | 806      | 1.61     | TRNT1     | 1116    | 550      | 2.03     |
| LMAN1     | 1773    | 4314     | 0.41     | TROVE2    | 574     | 1375     | 0.42     |
| LOC220729 | 1531    | 893      | 1.71     | TSC22D2   | 1034    | 634      | 1.63     |
| LONP1     | 11554   | 5743     | 2.01     | TSEN15    | 1455    | 2171     | 0.67     |
| LPCAT1    | 1236    | 2093     | 0.59     | TSR1      | 3665    | 3263     | 1.12     |
| LRP6      | 662     | 2011     | 0.33     | TUBE1     | 1095    | 194      | 5.64     |
| LRP8      | 1029    | 2260     | 0.46     | TWF1      | 1814    | 1995     | 0.91     |
| LRPPRC    | 11937   | 11375    | 1.05     | TWISTNB   | 593     | 1346     | 0.44     |
| LRRC58    | 1630    | 2861     | 0.57     | TXLNG     | 2939    | 1533     | 1.92     |
| LRRC8D    | 1076    | 1301     | 0.83     | TXNRD1    | 11241   | 4802     | 2.34     |
| LRRFIP1   | 6955    | 4259     | 1.63     | U2SURP    | 6738    | 7106     | 0.95     |
| LTN1      | 700     | 2549     | 0.27     | UBA5      | 2277    | 1315     | 1.73     |
| LUC7L     | 1872    | 674      | 2.78     | UBE2B     | 2736    | 2077     | 1.32     |
| LUC7L2    | 1067    | 1193     | 0.89     | UBE2E1    | 3994    | 2171     | 1.84     |
| LUC7L3    | 4383    | 2366     | 1.85     | UBE2K     | 4842    | 3479     | 1.39     |
| LYAR      | 2207    | 2046     | 1.08     | UBE2V2    | 2842    | 2394     | 1.19     |
| LYPLA1    | 2345    | 2020     | 1.16     | UBN2      | 718     | 1448     | 0.50     |
| LYRM7     | 441     | 1628     | 0.27     | UCHL5     | 1698    | 2509     | 0.68     |
| MACC1     | 919     | 4173     | 0.22     | UFL1      | 989     | 1348     | 0.73     |
| MAD2L1    | 2056    | 2887     | 0.71     | UFM1      | 5774    | 2918     | 1.98     |
| MAFF      | 2334    | 846      | 2.76     | UHRF2     | 1051    | 1131     | 0.93     |



Table S3E continued

| Symbol   | CIC-TEX | CD44v6kd | TEX:v6kd | Symbol   | CIC-TEX | CD44v6kd | TEX:v6kd |
|----------|---------|----------|----------|----------|---------|----------|----------|
| MAL2     | 19591   | 4146     | 4.73     | UPP1     | 2451    | 596      | 4.11     |
| MALAT1   | 3083    | 4201     | 0.73     | URI1     | 4950    | 1959     | 2.53     |
| MAN2A1   | 551     | 2910     | 0.19     | USP12    | 1736    | 1759     | 0.99     |
| MAP4K5   | 1295    | 1571     | 0.82     | USP15    | 1237    | 1124     | 1.10     |
| MAP7D3   | 1284    | 1544     | 0.83     | USP25    | 2014    | 1540     | 1.31     |
| MAPK6    | 4919    | 1283     | 3.83     | USP4     | 780     | 1381     | 0.56     |
| MAPK8    | 2875    | 1116     | 2.58     | USP53    | 2192    | 807      | 2.72     |
| MAPK8IP3 | 1208    | 1111     | 1.09     | VAMP7    | 3563    | 1993     | 1.79     |
| MARCH6   | 1220    | 6246     | 0.20     | VGf      | 2678    | 1092     | 2.45     |
| MARS     | 12686   | 10566    | 1.20     | VHL      | 1126    | 1051     | 1.07     |
| MAT2A    | 4303    | 5655     | 0.76     | VMA21    | 3149    | 3278     | 0.96     |
| MBNL2    | 1500    | 766      | 1.96     | VMP1     | 2480    | 3127     | 0.79     |
| MBP      | 1046    | 613      | 1.71     | VPS13A   | 919     | 2970     | 0.31     |
| MBTD1    | 1354    | 675      | 2.01     | VPS13C   | 951     | 1649     | 0.58     |
| MBTPS2   | 393     | 1207     | 0.33     | VPS37A   | 652     | 1857     | 0.35     |
| MCM10    | 600     | 1740     | 0.34     | WARS     | 19987   | 8097     | 2.47     |
| MCM8     | 999     | 1120     | 0.89     | WASL     | 2670    | 2227     | 1.20     |
| MDN1     | 2605    | 2213     | 1.18     | WDHD1    | 640     | 1976     | 0.32     |
| ME1      | 1547    | 1738     | 0.89     | WDR12    | 1987    | 3881     | 0.51     |
| ME2      | 2788    | 1575     | 1.77     | WDR19    | 1058    | 405      | 2.61     |
| MED13    | 3210    | 4592     | 0.70     | WDR3     | 3982    | 2194     | 1.81     |
| METRNL   | 1990    | 533      | 3.73     | WDR35    | 725     | 1189     | 0.61     |
| MEX3A    | 1051    | 2041     | 0.51     | WDR36    | 900     | 2300     | 0.39     |
| MFSD10   | 2009    | 1312     | 1.53     | WDR41    | 1512    | 1268     | 1.19     |
| MIB1     | 1528    | 2744     | 0.56     | WDR43    | 8005    | 3775     | 2.12     |
| MIGA1    | 224     | 1021     | 0.22     | WDR75    | 2501    | 3060     | 0.82     |
| MINA     | 1274    | 370      | 3.44     | WSB1     | 1535    | 539      | 2.85     |
| MIOS     | 1053    | 1308     | 0.81     | XPO4     | 2527    | 3937     | 0.64     |
| MITD1    | 1330    | 774      | 1.72     | XPOT     | 17938   | 5223     | 3.43     |
| MKLN1    | 1538    | 2782     | 0.55     | YARS     | 15162   | 8848     | 1.71     |
| MMS22L   | 389     | 1130     | 0.34     | YES1     | 5103    | 4813     | 1.06     |
| MORC3    | 775     | 1355     | 0.57     | YRDC     | 2845    | 900      | 3.16     |
| MOSPD1   | 1960    | 1907     | 1.03     | YTHDC2   | 709     | 1787     | 0.40     |
| MPHOSPH6 | 1682    | 1228     | 1.37     | ZBTB21   | 594     | 1123     | 0.53     |
| MPP6     | 772     | 2270     | 0.34     | ZBTB33   | 1031    | 3088     | 0.33     |
| MRPL12   | 2638    | 535      | 4.93     | ZC3H15   | 6203    | 4103     | 1.51     |
| MRPL32   | 1960    | 1596     | 1.23     | ZCCHC7   | 1455    | 1114     | 1.31     |
| MRPL42   | 3149    | 1648     | 1.91     | ZDHHC8   | 4607    | 692      | 6.66     |
| MRPL50   | 1910    | 1070     | 1.79     | ZFAND1   | 5662    | 1422     | 3.98     |
| MRPS25   | 1827    | 1049     | 1.74     | ZFAS1    | 29226   | 4764     | 6.13     |
| MTA1     | 3711    | 3059     | 1.21     | ZFC3H1   | 713     | 2150     | 0.33     |
| MTAP     | 1644    | 1169     | 1.41     | ZFP36    | 1898    | 672      | 2.82     |
| MT-CO1   | 11406   | 197061   | 0.06     | ZFP36L1  | 2504    | 4903     | 0.51     |
| MTF2     | 838     | 1202     | 0.70     | ZHX1     | 2265    | 906      | 2.50     |
| MTHFD1L  | 5310    | 2268     | 2.34     | ZMPSTE24 | 650     | 1818     | 0.36     |
| MTHFD2   | 18673   | 6552     | 2.85     | ZNF131   | 2270    | 899      | 2.52     |
| MTIF2    | 2817    | 2262     | 1.25     | ZNF146   | 6597    | 3692     | 1.79     |
| MT-ND4   | 16050   | 277843   | 0.06     | ZNF148   | 1121    | 1709     | 0.66     |
| MT-ND4L  | 1528    | 23921    | 0.06     | ZNF195   | 2016    | 683      | 2.95     |
| MT-ND5   | 3361    | 66592    | 0.05     | ZNF292   | 627     | 1474     | 0.43     |
| MT-ND6   | 711     | 19740    | 0.04     | ZNF330   | 2112    | 1268     | 1.67     |
| MT-RNR2  | 10765   | 218742   | 0.05     | ZNF367   | 221     | 1264     | 0.17     |
| MTRR     | 1759    | 1443     | 1.22     | ZNF451   | 996     | 1284     | 0.78     |
| MTURN    | 7265    | 449      | 16.18    | ZNF473   | 1121    | 729      | 1.54     |
| MXD1     | 1467    | 1571     | 0.93     | ZNF507   | 845     | 1379     | 0.61     |
| MXI1     | 1882    | 1235     | 1.52     | ZNF598   | 2828    | 1719     | 1.64     |
| MYC      | 7526    | 6589     | 1.14     | ZNF614   | 2751    | 387      | 7.11     |
| MYCBP2   | 2781    | 2402     | 1.16     | ZNF639   | 1703    | 1045     | 1.63     |
| MYRF     | 1446    | 151      | 9.58     | ZNF644   | 1743    | 2005     | 0.87     |
| MYSM1    | 1361    | 902      | 1.51     | ZNF664   | 15171   | 6956     | 2.18     |
| MZT1     | 1604    | 1588     | 1.01     | ZNF697   | 238     | 1113     | 0.21     |
| N4BP2L2  | 2678    | 3070     | 0.87     | ZNF706   | 2214    | 1145     | 1.93     |

Table S3E continued

| Symbol | CIC-TEX | CD44v6kd | TEX:v6kd | Symbol | CIC-TEX | CD44v6kd | TEX:v6kd |
|--------|---------|----------|----------|--------|---------|----------|----------|
| NAA15  | 2699    | 3251     | 0.83     | ZNF770 | 1422    | 1128     | 1.26     |
| NAA20  | 5589    | 2789     | 2.00     | ZRANB2 | 2232    | 2235     | 1.00     |
| NAA25  | 2063    | 1298     | 1.59     | ZWILCH | 1684    | 1736     | 0.97     |

<sup>a</sup> The ratio of CIC-TEX : CD44v6kd cells is shown for the signal strength of either CIC-TEX or CD44v6kd cells  $\geq 1000$ ;  $\geq 1.5$ -fold higher signal strength in CIC-TEX: red, in CD44v6kd cells: green, no significant difference in the signal strength between CIC-TEX and CD44v6kd cells: black.



Table S3F

**Correlation between increased mRNA recovery in CIC-TEX-treated Tspan8kd cells and recovery in CIC-TEX**Increased mRNA recovery in CIC-TEX-treated Tspan8kd cells and recovery in CIC-TEX<sup>a</sup>

| Symbol <sup>b</sup> | Tsp8kd<br>cells | kd cells +<br>holo-TEX | kd + TEX:<br>kd cells | CIC-TEX      | CIC-TEX:<br>kd cells |
|---------------------|-----------------|------------------------|-----------------------|--------------|----------------------|
| ADAM19              | 2957            | 7989                   | 2.70                  | 693          | 0.23                 |
| AHNAK2              | 734             | 1928                   | 2.63                  | 773          | 1.05                 |
| AKAP12              | 1433            | 4331                   | 3.02                  | 1623         | 1.13                 |
| <b>AKR1B10</b>      | 1393            | 2848                   | <b>2.04</b>           | <b>3512</b>  | <b>2.52</b>          |
| <b>ANXA10</b>       | 1679            | 3758                   | <b>2.24</b>           | <b>5529</b>  | <b>3.29</b>          |
| CALB2               | 2954            | 5968                   | 2.02                  | 4936         | 1.67                 |
| CAPRIN2             | 2225            | 6480                   | 2.91                  | 4241         | 1.91                 |
| CEACAM5             | 321             | 4033                   | 12.58                 | 24           | 0.08                 |
| CEACAM6             | 1230            | 8612                   | 7.00                  | 28           | 0.02                 |
| CEMIP               | 4256            | 9726                   | 2.29                  | 2882         | 0.68                 |
| <b>CHAC1</b>        | 710             | 1713                   | <b>2.41</b>           | <b>2583</b>  | <b>3.64</b>          |
| COL17A1             | 3337            | 8869                   | 2.66                  | 148          | 0.04                 |
| DCBLD2              | 3135            | 7757                   | 2.47                  | 2303         | 0.73                 |
| <b>DDIT3</b>        | 612             | 1646                   | <b>2.69</b>           | <b>12242</b> | <b>20.00</b>         |
| <b>DDIT4</b>        | 1828            | 4879                   | <b>2.67</b>           | <b>3629</b>  | <b>1.98</b>          |
| DKK1                | 2518            | 6444                   | 2.56                  | 2136         | 0.85                 |
| <b>DUSP5</b>        | 568             | 1135                   | <b>2.00</b>           | <b>2612</b>  | <b>4.60</b>          |
| EGR1                | 1742            | 3700                   | 2.12                  | 1437         | 0.83                 |
| EMP1                | 1981            | 5526                   | 2.79                  | 600          | 0.30                 |
| EREG                | 8012            | 16797                  | 2.10                  | 1225         | 0.15                 |
| ERRF1               | 4536            | 13557                  | 2.99                  | 5146         | 1.13                 |
| <b>FAM129A</b>      | 1730            | 3450                   | <b>1.99</b>           | <b>4449</b>  | <b>2.57</b>          |
| FAM135A             | 930             | 1894                   | 2.04                  | 1472         | 1.58                 |
| <b>FRMD5</b>        | 621             | 1236                   | <b>1.99</b>           | <b>1566</b>  | <b>2.52</b>          |
| <b>H1FO</b>         | 11089           | 33900                  | <b>3.06</b>           | <b>22262</b> | <b>2.01</b>          |
| HMGA1               | 32429           | 66203                  | 2.04                  | 37164        | 1.15                 |
| ID1                 | 1280            | 3276                   | 2.56                  | 589          | 0.46                 |
| IFI27               | 1863            | 6985                   | 3.75                  | 301          | 0.16                 |
| IFI6                | 1105            | 2514                   | 2.27                  | 301          | 0.27                 |
| IGFBP6              | 3224            | 6619                   | 2.05                  | 1992         | 0.62                 |
| JAG1                | 1956            | 6030                   | 3.08                  | 322          | 0.16                 |
| KLK10               | 1770            | 3634                   | 2.05                  | 26           | 0.01                 |
| LAMA3               | 1699            | 3660                   | 2.15                  | 542          | 0.32                 |
| LAMC2               | 1850            | 4027                   | 2.18                  | 587          | 0.32                 |
| LCN2                | 8428            | 17538                  | 2.08                  | 7399         | 0.88                 |
| MAOB                | 543             | 1190                   | 2.19                  | 151          | 0.28                 |
| <b>NDRG1</b>        | 2303            | 6502                   | <b>2.82</b>           | <b>7592</b>  | <b>3.30</b>          |
| <b>NEBL</b>         | 827             | 1797                   | <b>2.17</b>           | <b>4592</b>  | <b>5.55</b>          |
| NR1D1               | 723             | 2202                   | 3.05                  | 1231         | 1.70                 |
| NR1D2               | 1248            | 2932                   | 2.35                  | 1719         | 1.38                 |
| NRP1                | 933             | 2345                   | 2.51                  | 217          | 0.23                 |
| NTSR1               | 3605            | 8527                   | 2.37                  | 3440         | 0.95                 |
| PER1                | 667             | 1406                   | 2.11                  | 739          | 1.11                 |
| PMEPA1              | 4418            | 9628                   | 2.18                  | 1187         | 0.27                 |
| PSD3                | 1879            | 3824                   | 2.04                  | 907          | 0.48                 |
| SCEL                | 714             | 2590                   | 3.63                  | 295          | 0.41                 |
| SERPINE2            | 612             | 1315                   | 2.15                  | 1177         | 1.92                 |
| SLCO4A1             | 1270            | 3104                   | 2.44                  | 478          | 0.38                 |
| <b>SMOX</b>         | 1392            | 3598                   | <b>2.58</b>           | <b>8763</b>  | <b>6.29</b>          |
| <b>UPP1</b>         | 697             | 2110                   | <b>3.03</b>           | <b>2451</b>  | <b>3.51</b>          |

<sup>a</sup> The ratio of CIC-TEX-treated : untreated Tsp8kd cells is shown for the signal strength of CIC-TEX-treated Tsp8kd cells  $\geq 1000$ ;<sup>b</sup>  $\geq 2$ -fold higher signal strength in CIC-TEX and CIC-TEX-treated Tsp8kd cells compared to untreated Tsp8kd cells is indicated in bold.

Table S4

The impact of CIC-TEX treatment on miRNA recovery in CD44v6kd and Tspan8kd cells

Table S4A

Higher miRNA signal strength in CIC-TEX than CD44v6kd and/or Tspan8kd cells

| miRNA       | CIC-TEX | TEX:v6kd cells | TEX:Tsp8kd cells | miRNA       | CIC-TEX | TEX:v6kd cells | TEX:Tsp8kd cells |
|-------------|---------|----------------|------------------|-------------|---------|----------------|------------------|
| let-7b-5p   | 17099   | 1.65           | 1.49             | miR-361-5p  | 945     | 2.14           | 1.83             |
| let-7c-5p   | 2964    | 2.10           | 2.20             | miR-3656    | 1621    | 6.11           | 4.87             |
| let-7d-5p   | 10268   | 2.84           | 1.71             | miR-3679-5p | 1585    | 6.25           | 12.25            |
| miR-101-3p  | 1330    | 3.73           | 2.48             | miR-374a-5p | 2487    | 1.82           | 1.49             |
| miR-106b-5p | 14130   | 2.30           | 2.07             | miR-4257    | 527     | 2.67           | 2.39             |
| miR-10a-5p  | 12693   | 1.90           | 1.77             | miR-4271    | 1510    | 7.39           | 3.95             |
| miR-10b-5p  | 1499    | 4.53           | 4.26             | miR-4281    | 5197    | 7.05           | 1.92             |
| miR-1202    | 3211    | 1.54           | 1.69             | miR-429     | 5931    | 1.54           | 1.85             |
| miR-1207-5p | 2892    | 3.03           | 1.57             | miR-4299    | 1269    | 1.64           | 1.73             |
| miR-1225-5p | 2735    | 2.46           | 2.36             | miR-4306    | 6255    | 12.32          | 2.04             |
| miR-1246    | 59235   | 58.42          | 75.97            | miR-4428    | 532     | 3.78           | 1.86             |
| miR-125a-5p | 1849    | 2.04           | 1.57             | miR-4442    | 865     | 4.67           | 1.70             |
| miR-1268a   | 5693    | 13.55          | 5.91             | miR-4443    | 1440    | 4.57           | 9.86             |
| miR-130b-3p | 1508    | 1.64           | 1.60             | miR-4505    | 3848    | 6.23           | 6.04             |
| miR-148b-3p | 628     | 3.34           | 2.94             | miR-4507    | 1919    | 6.45           | 6.07             |
| miR-151a-3p | 1208    | 2.51           | 1.71             | miR-4530    | 12265   | 3.72           | 3.18             |
| miR-151b    | 2786    | 10.63          | 3.65             | miR-4532    | 513     | 2.86           | 1.77             |
| miR-183-5p  | 1169    | 1.65           | 2.71             | miR-455-3p  | 730     | 1.51           | 1.82             |
| miR-197-5p  | 1487    | 2.86           | 4.35             | miR-4655-5p | 798     | 1.96           | 2.75             |
| miR-200a-3p | 8550    | 2.83           | 1.72             | miR-4687-3p | 2116    | 3.46           | 2.29             |
| miR-200b-3p | 16703   | 1.62           | 1.49             | miR-4721    | 1349    | 2.20           | 3.06             |
| miR-20b-5p  | 2920    | 1.71           | 2.32             | miR-4728-5p | 1123    | 1.92           | 2.72             |
| miR-210-3p  | 2231    | 5.08           | 1.69             | miR-4741    | 1246    | 6.05           | 3.59             |
| miR-215-5p  | 11754   | 5.23           | 2.03             | miR-4787-5p | 961     | 2.42           | 2.43             |
| miR-224-5p  | 835     | 8.07           | 1.70             | miR-4788    | 842     | 1.56           | 1.64             |
| miR-23a-3p  | 10758   | 2.99           | 1.76             | miR-494-3p  | 11645   | 6.29           | 5.21             |
| miR-26a-5p  | 3055    | 1.71           | 1.69             | miR-5001-5p | 1391    | 6.63           | 6.03             |
| miR-26b-5p  | 6160    | 7.45           | 2.33             | miR-574-5p  | 4835    | 19.60          | 6.03             |
| miR-2861    | 1969    | 4.46           | 3.88             | miR-582-5p  | 483     | 4.47           | 1.98             |
| miR-30b-5p  | 5821    | 1.80           | 1.61             | miR-590-5p  | 1902    | 2.46           | 2.79             |
| miR-30d-5p  | 1743    | 3.17           | 2.13             | miR-638     | 2064    | 3.90           | 4.55             |
| miR-320a    | 1166    | 2.32           | 3.74             | miR-642a-3p | 8756    | 5.09           | 8.62             |
| miR-320c    | 2894    | 3.43           | 6.73             | miR-98-5p   | 1147    | 1.72           | 1.87             |
| miR-320d    | 1990    | 2.18           | 3.04             | miR-99b-5p  | 1312    | 1.93           | 1.80             |
| miR-320e    | 1231    | 2.21           | 2.83             |             |         |                |                  |
| let-7e-5p   | 9113    | 3.96           |                  | let-7g-5p   | 8467    |                | 1.56             |
| miR-135b-5p | 1066    | 1.70           |                  | miR-196a-5p | 3451    |                | 1.90             |
| miR-141-3p  | 17720   | 1.68           |                  | miR-20a-5p  | 18978   |                | 1.54             |
| miR-151a-5p | 3790    | 4.98           |                  | miR-301a-3p | 784     |                | 1.90             |
| miR-181a-5p | 1626    | 3.78           |                  | miR-31-3p   | 1842    |                | 1.50             |
| miR-185-5p  | 3596    | 3.54           |                  | miR-320b    | 966     |                | 1.91             |
| miR-1915-3p | 2601    | 2.47           |                  | miR-92a-3p  | 2531    |                | 1.94             |
| miR-192-5p  | 21112   | 3.25           |                  |             |         |                |                  |
| miR-194-5p  | 9526    | 3.21           |                  |             |         |                |                  |
| miR-200c-3p | 8567    | 1.55           |                  |             |         |                |                  |
| miR-22-3p   | 4163    | 1.93           |                  |             |         |                |                  |
| miR-28-5p   | 629     | 3.78           |                  |             |         |                |                  |
| miR-29c-3p  | 4232    | 3.30           |                  |             |         |                |                  |
| miR-30c-5p  | 1507    | 1.85           |                  |             |         |                |                  |
| miR-30e-5p  | 1597    | 1.93           |                  |             |         |                |                  |
| miR-34a-5p  | 1858    | 3.41           |                  |             |         |                |                  |
| miR-374b-5p | 1661    | 1.76           |                  |             |         |                |                  |
| miR-4466    | 1747    | 3.10           |                  |             |         |                |                  |
| miR-4485-5p | 1173    | 2.53           |                  |             |         |                |                  |
| miR-4516    | 12953   | 4.68           |                  |             |         |                |                  |
| miR-4739    | 620     | 1.85           |                  |             |         |                |                  |

Table S4B

miRNA upregulation in CIC-TEX-treated CD44v6kd and/or Tspan8kd cells<sup>a</sup>

| geneID      | v6kd cells | v6kd cells+<br>TEX | v6kd cells+<br>TEX:v6kd cells | Tsp8kd cells | Tsp8kd<br>cells+TEX | Tsp8kd c.+TEX:<br>Tsp8kd c. |
|-------------|------------|--------------------|-------------------------------|--------------|---------------------|-----------------------------|
| miR-1246    | 10149      | 49465              | 4.87                          | 33443        | 82066               | 2.45                        |
| miR-146a-5p | 133        | 690                | 5.20                          | 216          | 312                 | 1.44                        |
| miR-21-3p   | 427        | 884                | 2.07                          | 1380         | 2266                | 1.64                        |
| miR-21-5p   | 164171     | 540707             | 3.29                          | 838408       | 1345789             | 1.61                        |
| miR-25-5p   | 44         | 195                | 4.43                          | 102          | 220                 | 2.15                        |
| miR-27a-3p  | 6229       | 9490               | 1.52                          | 9634         | 14260               | 1.48                        |
| miR-3196    | 737        | 1122               | 1.52                          | 718          | 2177                | 3.03                        |
| miR-3656    | 225        | 399                | 1.77                          | 538          | 1907                | 3.54                        |
| miR-3960    | 222        | 360                | 1.62                          | 96           | 773                 | 8.05                        |
| miR-4485-3p | 171        | 493                | 2.89                          | 92           | 258                 | 2.80                        |
| miR-4488    | 234        | 636                | 2.71                          | 106          | 290                 | 2.74                        |
| miR-4492    | 373        | 742                | 1.99                          | 145          | 871                 | 6.01                        |
| miR-4497    | 2105       | 121021             | 57.49                         | 1062         | 5148                | 4.85                        |
| miR-4508    | 326        | 513                | 1.57                          | 62           | 187                 | 3.01                        |
| miR-4516    | 452        | 678                | 1.50                          | 304          | 895                 | 2.94                        |
| miR-5585-3p | 3046       | 15632              | 5.13                          | 2203         | 12304               | 5.59                        |
| miR-6087    | 775        | 4579               | 5.91                          | 474          | 856                 | 1.81                        |
| miR-7704    | 989        | 2837               | 2.87                          | 210          | 339                 | 1.62                        |
| miR-24-3p   |            |                    |                               | 6008         | 9063                | 1.51                        |
| miR-3074-5p |            |                    |                               | 3085         | 5001                | 1.62                        |
| miR-101-3p  | 3124       | 7199               | 2.30                          |              |                     |                             |
| miR-1248    | 137        | 778                | 5.68                          |              |                     |                             |
| miR-1301-3p | 70         | 492                | 7.04                          |              |                     |                             |
| miR-16-2-3p | 478        | 737                | 1.54                          |              |                     |                             |
| miR-181d-5p | 111        | 868                | 7.82                          |              |                     |                             |
| miR-19a-3p  | 191        | 562                | 2.94                          |              |                     |                             |
| miR-19b-3p  | 655        | 1081               | 1.65                          |              |                     |                             |
| miR-20a-5p  | 7797       | 11922              | 1.53                          |              |                     |                             |
| miR-29b-3p  | 275        | 590                | 2.15                          |              |                     |                             |
| miR-335-3p  | 992        | 1788               | 1.80                          |              |                     |                             |
| miR-3529-3p | 33977      | 70356              | 2.07                          |              |                     |                             |
| miR-424-3p  | 102        | 505                | 4.95                          |              |                     |                             |
| miR-4284    | 129        | 2012               | 15.60                         |              |                     |                             |
| miR-450a-5p | 335        | 609                | 1.82                          |              |                     |                             |
| miR-450b-5p | 60         | 534                | 8.90                          |              |                     |                             |
| miR-4521    | 101        | 536                | 5.31                          |              |                     |                             |
| miR-499a-5p | 109        | 6240               | 57.25                         |              |                     |                             |
| miR-499b-3p | 81         | 6178               | 76.27                         |              |                     |                             |
| miR-503-5p  | 36         | 599                | 16.64                         |              |                     |                             |
| miR-514a-3p | 69         | 680                | 9.86                          |              |                     |                             |
| miR-5701    | 1158       | 5910               | 5.10                          |              |                     |                             |
| miR-584-5p  | 51         | 487                | 9.51                          |              |                     |                             |
| miR-7-5p    | 33620      | 69692              | 2.07                          |              |                     |                             |
| miR-92b-3p  | 432        | 1122               | 2.60                          |              |                     |                             |
| miR-9-5p    | 60         | 7535               | 125.58                        |              |                     |                             |
| miR-96-5p   | 526        | 1437               | 2.73                          |              |                     |                             |

<sup>a</sup> miRNA upregulated in CIC-TEX-treated A818.4-v6kd and -Tsp8kd cells: red, -Tsp8kd cells: blue, -v6kd cells: green

Table S4C

miRNA downregulation in CIC-TEX-treated CD44v6kd and/or Tspan8kd cells<sup>a</sup>

| genelD       | v6kd cells | v6kd cells+TEX | v6kd cells+TEX:v6kd cells | Tsp8kd cells | Tsp8kd cells+TEX | Tsp8kd c.+TEX:Tsp8kd c. |
|--------------|------------|----------------|---------------------------|--------------|------------------|-------------------------|
| miR-10a-3p   | 581        | 353            | 0.61                      | 1096         | 688              | 0.63                    |
| miR-1273g-3p | 9592       | 2795           | 0.29                      | 3184         | 1216             | 0.38                    |
| miR-29c-3p   | 1608       | 38             | 0.02                      | 127          | 76               | 0.60                    |
| miR-3195     | 3034       | 137            | 0.05                      | 1783         | 824              | 0.46                    |
| miR-4454     | 144        | 85             | 0.59                      | 900          | 435              | 0.48                    |
| miR-4791     | 3575       | 1395           | 0.39                      | 2143         | 900              | 0.42                    |
| miR-574-3p   | 402        | 91             | 0.23                      | 152          | 93               | 0.61                    |
| miR-103a-3p  |            |                |                           | 41298        | 25800            | 0.62                    |
| miR-103b     |            |                |                           | 41298        | 25800            | 0.62                    |
| miR-1248     |            |                |                           | 5449         | 1023             | 0.19                    |
| miR-205-5p   |            |                |                           | 8329         | 4240             | 0.51                    |
| miR-26a-5p   |            |                |                           | 35403        | 22017            | 0.62                    |
| miR-3607-3p  |            |                |                           | 1783         | 265              | 0.15                    |
| miR-4284     |            |                |                           | 14594        | 4981             | 0.34                    |
| miR-744-5p   |            |                |                           | 1499         | 748              | 0.50                    |
| miR-934      |            |                |                           | 683          | 363              | 0.53                    |
| let-7b-5p    | 12169      | 7447           | 0.61                      |              |                  |                         |
| let-7c-5p    | 1726       | 1063           | 0.62                      |              |                  |                         |
| let-7d-3p    | 1278       | 572            | 0.45                      |              |                  |                         |
| let-7e-5p    | 2514       | 991            | 0.39                      |              |                  |                         |
| miR-10a-5p   | 105622     | 70093          | 0.66                      |              |                  |                         |
| miR-125a-5p  | 4229       | 1605           | 0.38                      |              |                  |                         |
| miR-126-5p   | 4358       | 45             | 0.01                      |              |                  |                         |
| miR-1296-5p  | 1737       | 67             | 0.04                      |              |                  |                         |
| miR-132-3p   | 635        | 94             | 0.15                      |              |                  |                         |
| miR-152-3p   | 1264       | 709            | 0.56                      |              |                  |                         |
| miR-181a-5p  | 1358       | 704            | 0.52                      |              |                  |                         |
| miR-191-5p   | 12698      | 8219           | 0.65                      |              |                  |                         |
| miR-200b-5p  | 742        | 410            | 0.55                      |              |                  |                         |
| miR-200c-3p  | 30928      | 20354          | 0.66                      |              |                  |                         |
| miR-23b-3p   | 13810      | 6096           | 0.44                      |              |                  |                         |
| miR-28-3p    | 890        | 564            | 0.63                      |              |                  |                         |
| miR-30c-5p   | 6406       | 4145           | 0.65                      |              |                  |                         |
| miR-30d-5p   | 86505      | 49971          | 0.58                      |              |                  |                         |
| miR-3182     | 244834     | 96766          | 0.40                      |              |                  |                         |
| miR-3184-3p  | 1677       | 1113           | 0.66                      |              |                  |                         |
| miR-320a     | 6727       | 4317           | 0.64                      |              |                  |                         |
| miR-339-5p   | 1523       | 701            | 0.46                      |              |                  |                         |
| miR-361-5p   | 719        | 314            | 0.44                      |              |                  |                         |
| miR-423-5p   | 1677       | 1113           | 0.66                      |              |                  |                         |
| miR-425-5p   | 834        | 485            | 0.58                      |              |                  |                         |
| miR-4448     | 238922     | 19553          | 0.08                      |              |                  |                         |
| miR-4532     | 1551       | 929            | 0.60                      |              |                  |                         |
| miR-615-3p   | 533        | 292            | 0.55                      |              |                  |                         |
| miR-629-5p   | 7691       | 1399           | 0.18                      |              |                  |                         |
| miR-7641     | 65136      | 18501          | 0.28                      |              |                  |                         |
| miR-95-3p    | 1337       | 635            | 0.48                      |              |                  |                         |
| miR-99b-3p   | 616        | 273            | 0.44                      |              |                  |                         |
| miR-99b-5p   | 3701       | 1786           | 0.48                      |              |                  |                         |

<sup>a</sup> miRNA downregulated in CIC-TEX-treated A818.4-v6kd and -Tsp8kd cells: red, -Tsp8kd cells: blue, -v6kd cells: green

Table S5

**Correlation between upregulated miRNA and downregulated mRNA**

Table S5A

**Reduced mRNA and increased miRNA recovery in CIC-TEX-treated CD44v6kd and Tspan8kd cells<sup>a</sup>****Reduced mRNA in TEX-treated CD44v6kd and Tspan8kd cells**

| mRNA           | miRNA       |            |             |             |             |          |
|----------------|-------------|------------|-------------|-------------|-------------|----------|
| <b>ACSS2</b>   | miR-4492    |            |             |             |             |          |
| <b>CEACAM1</b> | miR-29b-3p  | miR-4488   | miR-4516    |             |             |          |
| <b>FUCA1</b>   | miR-9-5p    | miR-503-5p | miR-1248    | miR-4516    |             |          |
| <b>HMGCS1</b>  | miR-29b-3p  |            |             |             |             |          |
| <b>HOXB8</b>   | miR-27a-3p  | miR-92b-3p | miR-146a-5p | miR-181d-5p | miR-3529-3p | miR-3960 |
| <b>IDI1</b>    | miR-499a-5p |            |             |             |             |          |
| <b>IFIT3</b>   | miR-146a-5p |            |             |             |             |          |
| <b>INSIG1</b>  | miR-24-3p   | miR-29b-3p | miR-1246    | miR-3656    | miR-4284    |          |
| <b>MSMO1</b>   | miR-19a-3p  | miR-20a-5p | miR-424-3p  |             |             |          |
| <b>SCD</b>     | miR-181d-5p |            |             |             |             |          |

**Reduced mRNA in TEX-treated Tspan8kd cells**

| mRNA            | miRNA       |             |             |          |  |
|-----------------|-------------|-------------|-------------|----------|--|
| <b>ALDH1L1</b>  | miR-7704    |             |             |          |  |
| <b>ARL15</b>    | miR-335-3p  |             |             |          |  |
| <b>ATP6V1B1</b> | miR-21-5p   | miR-3960    |             |          |  |
| <b>BCAS1</b>    | miR-21-3p   | miR-3656    | miR-4488    | miR-4492 |  |
| <b>BTG2</b>     | miR-21-5p   | miR-27a-3p  |             |          |  |
| <b>CFH</b>      | miR-21-5p   | miR-146a-5p |             |          |  |
| <b>CLEC3A</b>   | miR-4492    |             |             |          |  |
| <b>F2R</b>      | miR-3196    | miR-4488    |             |          |  |
| <b>FGD3</b>     | miR-4488    | miR-4492    | miR-4497    | miR-6087 |  |
| <b>GAA</b>      | miR-3960    | miR-4488    |             |          |  |
| <b>GABRP</b>    | miR-27a-3p  |             |             |          |  |
| <b>GATA2</b>    | miR-27a-3p  |             |             |          |  |
| <b>KLHDC7A</b>  | miR-7704    |             |             |          |  |
| <b>LMO4</b>     | miR-21-3p   | miR-335-3p  |             |          |  |
| <b>MEIS2</b>    | miR-21-3p   | miR-24-3p   | miR-4485-3p | miR-7704 |  |
| <b>PRICKLE4</b> | miR-4488    |             |             |          |  |
| <b>RGS2</b>     | miR-21-3p   | miR-3074-5p |             |          |  |
| <b>RNF141</b>   | miR-27a-3p  | miR-1246    | miR-4488    |          |  |
| <b>SHROOM1</b>  | miR-3196    | miR-4516    |             |          |  |
| <b>TACSTD2</b>  | miR-4497    |             |             |          |  |
| <b>TGM2</b>     | miR-4488    | miR-4492    | miR-7704    |          |  |
| <b>THBS1</b>    | miR-3074-5p |             |             |          |  |
| <b>WWOX</b>     | miR-24-3p   | miR-146a-5p |             |          |  |
| <b>ZNF704</b>   | miR-21-5p   |             |             |          |  |

**Reduced mRNA in TEX-treated CD44v6kd cells**

| mRNA            | miRNA      |             |             |          |          |          |          |
|-----------------|------------|-------------|-------------|----------|----------|----------|----------|
| <b>ABHD12B</b>  | miR-21-3p  | miR-27a-3p  | miR-499b-3p | miR-4488 | miR-4492 |          |          |
| <b>ACAT2</b>    | miR-92b-3p |             |             |          |          |          |          |
| <b>ACP2</b>     | miR-4492   | miR-7704    |             |          |          |          |          |
| <b>ADAMTS8</b>  | miR-335-3p | miR-7704    |             |          |          |          |          |
| <b>ADAMTSL2</b> | miR-3196   | miR-3960    | miR-4488    | miR-4492 |          |          |          |
| <b>ADI1</b>     | miR-4521   |             |             |          |          |          |          |
| <b>ALDH3A1</b>  | miR-4492   |             |             |          |          |          |          |
| <b>AMOT</b>     | miR-29b-3p |             |             |          |          |          |          |
| <b>APCDD1</b>   | miR-7-5p   | miR-20a-5p  | miR-4492    |          |          |          |          |
| <b>APOE</b>     | miR-3196   | miR-7704    |             |          |          |          |          |
| <b>ARHGAP1</b>  | miR-19a-3p | miR-20a-5p  | miR-25-5p   | miR-3196 | miR-4488 | miR-4492 | miR-6087 |
| <b>ARHGAP18</b> | miR-101-3p | miR-181d-5p | miR-499b-3p |          |          |          |          |
| <b>ARHGEF40</b> | miR-4492   |             |             |          |          |          |          |

Table S5A continued

## Reduced mRNA in TEX-treated CD44v6kd cells

| mRNA      | miRNA       |             |             |             |            |          |          |          |  |
|-----------|-------------|-------------|-------------|-------------|------------|----------|----------|----------|--|
| ARMC7     | miR-29b-3p  | miR-3656    | miR-4492    |             |            |          |          |          |  |
| ASPSCR1   | miR-25-5p   |             |             |             |            |          |          |          |  |
| ATP6V0D1  | miR-5701    |             |             |             |            |          |          |          |  |
| ATP6V0E2  | miR-7-5p    | miR-3656    | miR-4492    | miR-4497    | miR-6087   | miR-7704 |          |          |  |
| AXIN2     | miR-1246    | miR-3656    |             |             |            |          |          |          |  |
| BAMBI     | miR-19a-3p  | miR-20a-5p  |             |             |            |          |          |          |  |
| BCL2L15   | miR-20a-5p  |             |             |             |            |          |          |          |  |
| BHLHE40   | miR-181d-5p |             |             |             |            |          |          |          |  |
| C12orf57  | miR-5701    |             |             |             |            |          |          |          |  |
| C6orf223  | miR-3196    | miR-3960    | miR-4488    | miR-4497    | miR-4516   |          |          |          |  |
| CASS4     | miR-25-5p   | miR-6087    |             |             |            |          |          |          |  |
| CCDC3     | miR-4488    | miR-7704    |             |             |            |          |          |          |  |
| CDKN1A    | miR-20a-5p  | miR-21-3p   | miR-92b-3p  | miR-499a-5p | miR-503-5p | miR-3196 | miR-4488 | miR-4516 |  |
| CDKN2C    | miR-450b-5p |             |             |             |            |          |          |          |  |
| CDX2      | miR-181d-5p |             |             |             |            |          |          |          |  |
| CEMIP     | miR-29b-3p  | miR-4488    |             |             |            |          |          |          |  |
| CHI3L1    | miR-4492    |             |             |             |            |          |          |          |  |
| CHRNA3    | miR-450b-5p | miR-4488    |             |             |            |          |          |          |  |
| CHRNB1    | miR-4492    |             |             |             |            |          |          |          |  |
| CLU       | miR-19a-3p  | miR-25-5p   | miR-1301-3p | miR-4488    |            |          |          |          |  |
| CPNE2     | miR-181d-5p | miR-4492    |             |             |            |          |          |          |  |
| CRAT      | miR-6087    |             |             |             |            |          |          |          |  |
| CREB3L4   | miR-424-3p  |             |             |             |            |          |          |          |  |
| CST1      | miR-4488    |             |             |             |            |          |          |          |  |
| CST3      | miR-25-5p   | miR-450b-5p | miR-4492    |             |            |          |          |          |  |
| DBH       | miR-25-5p   | miR-3196    | miR-4492    | miR-6087    |            |          |          |          |  |
| DHCR24    | miR-96-5p   | miR-503-5p  | miR-4492    |             |            |          |          |          |  |
| DYSF      | miR-25-5p   |             |             |             |            |          |          |          |  |
| EBP       | miR-1248    |             |             |             |            |          |          |          |  |
| ENTPD8    | miR-4488    | miR-4497    |             |             |            |          |          |          |  |
| FADS2     | miR-4492    | miR-4516    | miR-6087    | miR-7704    |            |          |          |          |  |
| FAM178B   | miR-3196    | miR-4492    | miR-4508    | miR-7704    |            |          |          |          |  |
| FAM46C    | miR-9-5p    |             |             |             |            |          |          |          |  |
| FBXO2     | miR-4492    |             |             |             |            |          |          |          |  |
| FBXW4     | miR-4492    |             |             |             |            |          |          |          |  |
| GALNT6    | miR-4488    | miR-4492    | miR-4497    |             |            |          |          |          |  |
| GBA       | miR-1248    | miR-4488    | miR-4492    | miR-4516    |            |          |          |          |  |
| GMFG      | miR-450b-5p |             |             |             |            |          |          |          |  |
| GPR155    | miR-450a-5p | miR-4497    |             |             |            |          |          |          |  |
| GRM8      | miR-450a-5p | miR-514a-3p |             |             |            |          |          |          |  |
| HELZ2     | miR-25-5p   | miR-3196    | miR-3656    | miR-4492    |            |          |          |          |  |
| HMGCR     | miR-27a-3p  | miR-29b-3p  | miR-3529-3p |             |            |          |          |          |  |
| HOXA11    | miR-9-5p    | miR-181d-5p | miR-584-5p  | miR-4492    | miR-6087   |          |          |          |  |
| HOXB7     | miR-25-5p   | miR-4492    |             |             |            |          |          |          |  |
| HUNK      | miR-9-5p    | miR-27a-3p  |             |             |            |          |          |          |  |
| HYAL2     | miR-4488    |             |             |             |            |          |          |          |  |
| IFIT1     | miR-499b-3p |             |             |             |            |          |          |          |  |
| IFITM3    | miR-29b-3p  |             |             |             |            |          |          |          |  |
| IL17RD    | miR-21-3p   | miR-29b-3p  |             |             |            |          |          |          |  |
| ISG15     | miR-3529-3p |             |             |             |            |          |          |          |  |
| KAZALD1   | miR-3196    | miR-4488    | miR-4492    |             |            |          |          |          |  |
| KCNJ5     | miR-96-5p   | miR-3196    | miR-4488    | miR-4492    |            |          |          |          |  |
| KLHL25    | miR-29b-3p  | miR-4488    | miR-4492    |             |            |          |          |          |  |
| LINC01124 | miR-4488    | miR-4516    |             |             |            |          |          |          |  |

Table S5A continued

## Reduced mRNA in TEX-treated CD44v6kd cells

| mRNA     | miRNA       |             |             |            |             |             |          |  |
|----------|-------------|-------------|-------------|------------|-------------|-------------|----------|--|
| LRRRC75A | miR-584-5p  | miR-4492    |             |            |             |             |          |  |
| MCTP1    | miR-514a-3p | miR-1301-3p |             |            |             |             |          |  |
| MSRB2    | miR-92b-3p  |             |             |            |             |             |          |  |
| MSRB3    | miR-499b-3p | miR-4497    |             |            |             |             |          |  |
| MVD      | miR-1301-3p |             |             |            |             |             |          |  |
| MVK      | miR-20a-5p  | miR-514a-3p | miR-3196    | miR-4488   | miR-4497    |             |          |  |
| MX2      | miR-7704    |             |             |            |             |             |          |  |
| MYCL     | miR-4492    |             |             |            |             |             |          |  |
| MYH7B    | miR-4488    | miR-4508    |             |            |             |             |          |  |
| MYL6     | miR-29b-3p  |             |             |            |             |             |          |  |
| MYO1D    | miR-20a-5p  | miR-3196    | miR-4492    | miR-6087   |             |             |          |  |
| NAT16    | miR-3196    | miR-4488    | miR-4492    | miR-5701   |             |             |          |  |
| NEDD9    | miR-29b-3p  |             |             |            |             |             |          |  |
| NEURL1B  | miR-27a-3p  | miR-92b-3p  | miR-503-5p  | miR-4488   | miR-4508    |             |          |  |
| NFATC4   | miR-4492    |             |             |            |             |             |          |  |
| NFE2     | miR-7-5p    |             |             |            |             |             |          |  |
| NGFR     | miR-27a-3p  | miR-3196    | miR-4488    | miR-4492   |             |             |          |  |
| NKD1     | miR-503-5p  |             |             |            |             |             |          |  |
| NOTUM    | miR-3656    | miR-4492    |             |            |             |             |          |  |
| NUCB1    | miR-3196    | miR-4488    | miR-4492    | miR-7704   |             |             |          |  |
| NUDT19   | miR-25-5p   | miR-181d-5p | miR-6087    |            |             |             |          |  |
| OAS1     | miR-1301-3p |             |             |            |             |             |          |  |
| OAS3     | miR-7-5p    |             |             |            |             |             |          |  |
| OBSL1    | miR-7704    |             |             |            |             |             |          |  |
| OGDHL    | miR-9-5p    | miR-3196    |             |            |             |             |          |  |
| ORAI3    | miR-6087    |             |             |            |             |             |          |  |
| PARM1    | miR-181d-5p | miR-424-3p  | miR-499a-5p | miR-503-5p | miR-1246    | miR-3529-3p | miR-4492 |  |
| PARP10   | miR-3196    | miR-3960    | miR-4488    |            |             |             |          |  |
| PBXIP1   | miR-4492    |             |             |            |             |             |          |  |
| PCCA     | miR-514a-3p |             |             |            |             |             |          |  |
| PCSK9    | miR-29b-3p  |             |             |            |             |             |          |  |
| PCYT2    | miR-4488    |             |             |            |             |             |          |  |
| PDE6D    | miR-27a-3p  |             |             |            |             |             |          |  |
| PHLDB2   | miR-9-5p    | miR-21-3p   | miR-499b-3p |            |             |             |          |  |
| PIK3R3   | miR-9-5p    | miR-19a-3p  | miR-29b-3p  | miR-92b-3p | miR-181d-5p | miR-4492    |          |  |
| PLEKHA4  | miR-146a-5p | miR-7704    |             |            |             |             |          |  |
| PLIN3    | miR-4284    |             |             |            |             |             |          |  |
| POLR1D   | miR-25-5p   | miR-29b-3p  | miR-3529-3p |            |             |             |          |  |
| PPARD    | miR-4488    | miR-4492    | miR-4508    |            |             |             |          |  |
| PPP2R2C  | miR-6087    |             |             |            |             |             |          |  |
| PRDX2    | miR-4488    |             |             |            |             |             |          |  |
| PRR5L    | miR-19a-3p  | miR-3196    |             |            |             |             |          |  |
| QSOX1    | miR-7704    |             |             |            |             |             |          |  |
| RAB15    | miR-7-5p    | miR-29b-3p  | miR-101-3p  | miR-1248   | miR-4492    | miR-4497    | miR-7704 |  |
| RAB42    | miR-4284    |             |             |            |             |             |          |  |
| RASL11B  | miR-20a-5p  |             |             |            |             |             |          |  |
| RDH11    | miR-7-5p    | miR-96-5p   |             |            |             |             |          |  |
| REEP2    | miR-3196    | miR-3656    | miR-4492    | miR-4508   |             |             |          |  |
| SAMHD1   | miR-4508    |             |             |            |             |             |          |  |
| SCNN1A   | miR-7-5p    | miR-25-5p   | miR-4492    |            |             |             |          |  |
| SEC14L2  | miR-96-5p   |             |             |            |             |             |          |  |
| SFN      | miR-3656    | miR-4488    | miR-7704    |            |             |             |          |  |
| SLC12A4  | miR-4492    |             |             |            |             |             |          |  |
| SLC1A4   | miR-21-3p   | miR-6087    |             |            |             |             |          |  |

Table S5A continued

## Reduced mRNA in TEX-treated CD44v6kd cells

| mRNA      | miRNA       |             |             |             |          |          |          |          |  |
|-----------|-------------|-------------|-------------|-------------|----------|----------|----------|----------|--|
| SLC25A1   | miR-25-5p   | miR-96-5p   | miR-3196    | miR-6087    |          |          |          |          |  |
| SLC2A6    | miR-3196    | miR-4492    |             |             |          |          |          |          |  |
| SLC4A8    | miR-146a-5p | miR-181d-5p |             |             |          |          |          |          |  |
| SLC5A1    | miR-3529-3p |             |             |             |          |          |          |          |  |
| SLC7A8    | miR-96-5p   | miR-1301-3p | miR-3196    | miR-3656    | miR-3960 | miR-4488 | miR-4492 |          |  |
| SORT1     | miR-96-5p   | miR-146a-5p |             |             |          |          |          |          |  |
| SPRYD4    | miR-92b-3p  |             |             |             |          |          |          |          |  |
| SPTB      | miR-4492    |             |             |             |          |          |          |          |  |
| SQLE      | miR-584-5p  |             |             |             |          |          |          |          |  |
| SREBF1    | miR-4497    |             |             |             |          |          |          |          |  |
| ST5       | miR-4488    | miR-4492    |             |             |          |          |          |          |  |
| STARD3    | miR-146a-5p | miR-499a-5p | miR-3196    | miR-4508    | miR-4488 |          |          |          |  |
| STARD4    | miR-4516    | miR-20a-5p  | miR-181d-5p | miR-499b-3p | miR-1246 | miR-4284 | miR-4521 | miR-5701 |  |
| STAT1     | miR-19a-3p  |             |             |             |          |          |          |          |  |
| STAT2     | miR-27a-3p  | miR-4492    |             |             |          |          |          |          |  |
| SYNE1     | miR-7-5p    | miR-20a-5p  | miR-1248    |             |          |          |          |          |  |
| TAP1      | miR-21-3p   | miR-101-3p  |             |             |          |          |          |          |  |
| TAS1R3    | miR-4492    | miR-7704    |             |             |          |          |          |          |  |
| TBC1D17   | miR-20a-5p  | miR-3960    |             |             |          |          |          |          |  |
| TCTA      | miR-4284    | miR-7704    |             |             |          |          |          |          |  |
| TDGF1     | miR-4521    | miR-5585-3p |             |             |          |          |          |          |  |
| TECR      | miR-4497    |             |             |             |          |          |          |          |  |
| TEF       | miR-92b-3p  |             |             |             |          |          |          |          |  |
| TGFB111   | miR-20a-5p  | miR-3196    | miR-4497    |             |          |          |          |          |  |
| TM7SF2    | miR-4492    |             |             |             |          |          |          |          |  |
| TMEM45B   | miR-19a-3p  |             |             |             |          |          |          |          |  |
| TNFRSF11B | miR-21-3p   | miR-181d-5p |             |             |          |          |          |          |  |
| TNFRSF19  | miR-3656    | miR-4485-3p |             |             |          |          |          |          |  |
| TP53INP2  | miR-29b-3p  | miR-4488    |             |             |          |          |          |          |  |
| TRIM21    | miR-450b-5p |             |             |             |          |          |          |          |  |
| TRIM29    | miR-3656    | miR-4488    |             |             |          |          |          |          |  |
| TSPAN1    | miR-27a-3p  |             |             |             |          |          |          |          |  |
| TST       | miR-7704    |             |             |             |          |          |          |          |  |
| UBE2L6    | miR-27a-3p  | miR-29b-3p  |             |             |          |          |          |          |  |
| VAMP8     | miR-7-5p    | miR-96-5p   | miR-4497    | miR-4521    |          |          |          |          |  |
| VDAC3     | miR-27a-3p  |             |             |             |          |          |          |          |  |
| VDR       | miR-4492    | miR-6087    | miR-7704    |             |          |          |          |          |  |
| VEGFB     | miR-27a-3p  | miR-101-3p  | miR-4488    | miR-4492    |          |          |          |          |  |
| VEPH1     | miR-450b-5p |             |             |             |          |          |          |          |  |
| WBP1L     | miR-19a-3p  | miR-27a-3p  | miR-29b-3p  | miR-4485-3p | miR-4488 |          |          |          |  |
| WBP2      | miR-19a-3p  | miR-4492    |             |             |          |          |          |          |  |
| WNT6      | miR-4508    |             |             |             |          |          |          |          |  |
| ZBTB7C    | miR-101-3p  | miR-4492    |             |             |          |          |          |          |  |
| ZDHC12    | miR-499a-5p | miR-4492    | miR-4508    | miR-7704    |          |          |          |          |  |
| ZNF831    | miR-19a-3p  |             |             |             |          |          |          |          |  |

<sup>a</sup> miRNA targeting the indicated mRNA are shown. miRNA increased in CIC-TEX treated CD44v6kd and Tspan8kd cells: red, miRNA increased in CIC-TEX treated Tspan8kd cells: blue, miRNA increased in CIC-TEX treated CD44v6kd cells: green



Table S5B

**Increased mRNA and reduced miRNA recovery in CIC-TEX-treated CD44v6kd and Tspan8kd cells<sup>a</sup>****Increased mRNA in TEX-treated CD44v6kd and Tspan8kd cells**

| mRNA           | miRNA                                    |
|----------------|------------------------------------------|
| <b>CAPRIN2</b> | miR-181a-5p                              |
| <b>DCBLD2</b>  | miR-99b-3p miR-200b-5p miR-574-3p        |
| <b>DDIT3</b>   | miR-934                                  |
| <b>EMP1</b>    | miR-29c-3p miR-95-3p miR-152-3p miR-1248 |
| <b>FAM129A</b> | miR-99b-3p                               |
| <b>FAM135A</b> | let-7c-5p                                |
| <b>HMGA1</b>   | let-7c-5p miR-26a-5p                     |
| <b>NRP1</b>    | miR-152-3p miR-423-5p miR-1248           |
| <b>PMEPA1</b>  | miR-574-3p                               |

**Increased mRNA in TEX-treated Tspan8kd cells**

| mRNA           | miRNA                    |
|----------------|--------------------------|
| <b>ADAM19</b>  | miR-29c-3p               |
| <b>CALB2</b>   | miR-744-5p miR-3607-3p   |
| <b>CEACAM5</b> | miR-3607-3p              |
| <b>CEACAM6</b> | miR-29c-3p               |
| <b>CEMIP</b>   | miR-29c-3p               |
| <b>CHAC1</b>   | miR-26a-5p               |
| <b>DKK1</b>    | miR-103b                 |
| <b>DUSP5</b>   | miR-205-5p               |
| <b>EREG</b>    | miR-26a-5p miR-29c-3p    |
| <b>ERRF1</b>   | miR-205-5p               |
| <b>H1FO</b>    | miR-1273g-3p miR-3607-3p |
| <b>ID1</b>     | miR-29c-3p miR-103b      |
| <b>IFI6</b>    | miR-1273g-3p             |
| <b>IGFBP6</b>  | miR-744-5p               |
| <b>LCN2</b>    | miR-1273g-3p             |
| <b>NEBL</b>    | miR-205-5p               |

**Increased mRNA in TEX-treated CD44v6kd cells**

| mRNA            | miRNA                                                                                |
|-----------------|--------------------------------------------------------------------------------------|
| <b>ABCE1</b>    | miR-29c-3p miR-629-5p                                                                |
| <b>ADGRL1</b>   | miR-10a-5p miR-423-5p miR-615-3p                                                     |
| <b>AKNA</b>     | let-7c-5p                                                                            |
| <b>AP1AR</b>    | miR-99b-5p miR-181a-5p miR-200b-5p                                                   |
| <b>ARGLU1</b>   | miR-200b-5p miR-361-5p                                                               |
| <b>ARL5B</b>    | miR-181a-5p                                                                          |
| <b>ASNS</b>     | miR-23b-3p                                                                           |
| <b>ATF3</b>     | miR-200b-5p miR-629-5p                                                               |
| <b>ATP11A</b>   | miR-152-3p                                                                           |
| <b>ATP13A3</b>  | let-7c-5p                                                                            |
| <b>B3GNT5</b>   | let-7c-5p miR-10a-5p miR-29c-3p miR-30c-5p                                           |
| <b>B4GALNT4</b> | miR-423-5p                                                                           |
| <b>BAG2</b>     | miR-181a-5p                                                                          |
| <b>BAZ1A</b>    | miR-320a miR-7641                                                                    |
| <b>BDP1</b>     | let-7c-5p miR-30c-5p miR-200b-5p miR-423-5p                                          |
| <b>BMI1</b>     | miR-629-5p miR-1273g-3p                                                              |
| <b>BRWD1</b>    | miR-125a-5p miR-132-3p                                                               |
| <b>BTAF1</b>    | miR-23b-3p miR-132-3p miR-152-3p                                                     |
| <b>CARNMT1</b>  | let-7c-5p miR-320a                                                                   |
| <b>CCDC14</b>   | miR-30c-5p miR-99b-3p                                                                |
| <b>CCND2</b>    | let-7c-5p miR-29c-3p miR-191-5p                                                      |
| <b>CCNT2</b>    | miR-23b-3p miR-30c-5p                                                                |
| <b>CDC42EP1</b> | miR-339-5p miR-423-5p                                                                |
| <b>CDK6</b>     | let-7c-5p miR-10a-5p miR-29c-3p miR-95-3p miR-125a-5p miR-152-3p miR-191-5p miR-320a |

Table S5B continued

## Increased mRNA in TEX-treated CD44v6kd cells

| mRNA            | miRNA             |                     |                   |                     |            |            |            |             |  |
|-----------------|-------------------|---------------------|-------------------|---------------------|------------|------------|------------|-------------|--|
| <b>CEBPG</b>    | miR-125a-5p       | miR-152-3p          |                   |                     |            |            |            |             |  |
| <b>CEP290</b>   | miR-99b-3p        |                     |                   |                     |            |            |            |             |  |
| <b>CFAP97</b>   | miR-152-3p        | miR-200b-5p         |                   |                     |            |            |            |             |  |
| <b>CHORDC1</b>  | <b>miR-10a-3p</b> | miR-30c-5p          | miR-200b-5p       |                     |            |            |            |             |  |
| <b>CLK1</b>     | miR-320a          |                     |                   |                     |            |            |            |             |  |
| <b>CNTRL</b>    | let-7c-5p         | miR-181a-5p         |                   |                     |            |            |            |             |  |
| <b>CREBZF</b>   | miR-23b-3p        | miR-181a-5p         | miR-423-5p        | miR-425-5p          |            |            |            |             |  |
| <b>CSNK1A1</b>  | miR-28-3p         | miR-30c-5p          | miR-3182          |                     |            |            |            |             |  |
| <b>DCAF17</b>   | miR-339-5p        | miR-3184-3p         |                   |                     |            |            |            |             |  |
| <b>DCUN1D4</b>  | <b>miR-29c-3p</b> | miR-132-3p          | miR-152-3p        | <b>miR-1273g-3p</b> |            |            |            |             |  |
| <b>DGKE</b>     | miR-28-3p         | miR-30c-5p          | miR-423-5p        |                     |            |            |            |             |  |
| <b>DGKH</b>     | <b>miR-29c-3p</b> | miR-30c-5p          | miR-126-5p        |                     |            |            |            |             |  |
| <b>DICER1</b>   | let-7c-5p         | miR-125a-5p         |                   |                     |            |            |            |             |  |
| <b>DNAH14</b>   | miR-126-5p        |                     |                   |                     |            |            |            |             |  |
| <b>DNAJB14</b>  | miR-361-5p        |                     |                   |                     |            |            |            |             |  |
| <b>DOCK6</b>    | miR-152-3p        |                     |                   |                     |            |            |            |             |  |
| <b>DPY19L3</b>  | miR-99b-5p        | miR-7641            |                   |                     |            |            |            |             |  |
| <b>DST</b>      | miR-126-5p        | miR-3182            |                   |                     |            |            |            |             |  |
| <b>DUS4L</b>    | miR-95-3p         |                     |                   |                     |            |            |            |             |  |
| <b>DVL1</b>     | miR-423-5p        |                     |                   |                     |            |            |            |             |  |
| <b>EDEM3</b>    | let-7c-5p         | miR-30c-5p          |                   |                     |            |            |            |             |  |
| <b>EIF1AX</b>   | miR-10a-5p        | miR-200b-5p         | miR-361-5p        |                     |            |            |            |             |  |
| <b>EIF3J</b>    | let-7c-5p         | <b>miR-29c-3p</b>   | miR-425-5p        |                     |            |            |            |             |  |
| <b>EIF4A2</b>   | miR-132-3p        | miR-181a-5p         |                   |                     |            |            |            |             |  |
| <b>ENAH</b>     | miR-181a-5p       |                     |                   |                     |            |            |            |             |  |
| <b>FAM107B</b>  | miR-125a-5p       | miR-3184-3p         | miR-7641          |                     |            |            |            |             |  |
| <b>FAM60A</b>   | miR-28-3p         | <b>miR-1273g-3p</b> | miR-4448          |                     |            |            |            |             |  |
| <b>FHL1</b>     | miR-200b-5p       | miR-339-5p          | <b>miR-574-3p</b> |                     |            |            |            |             |  |
| <b>FMNL2</b>    | miR-181a-5p       |                     |                   |                     |            |            |            |             |  |
| <b>FOXN2</b>    | miR-629-5p        |                     |                   |                     |            |            |            |             |  |
| <b>GAL</b>      | miR-200b-5p       |                     |                   |                     |            |            |            |             |  |
| <b>GCLC</b>     | miR-30c-5p        | miR-95-3p           |                   |                     |            |            |            |             |  |
| <b>GCLM</b>     | miR-28-3p         | miR-425-5p          |                   |                     |            |            |            |             |  |
| <b>GOLT1B</b>   | miR-152-3p        | miR-425-5p          |                   |                     |            |            |            |             |  |
| <b>GPD1L</b>    | miR-181a-5p       |                     |                   |                     |            |            |            |             |  |
| <b>GPRC5A</b>   | miR-152-3p        |                     |                   |                     |            |            |            |             |  |
| <b>GRB10</b>    | miR-30c-5p        | miR-125a-5p         | miR-629-5p        |                     |            |            |            |             |  |
| <b>GTF2F2</b>   | miR-629-5p        | miR-3184-3p         | miR-4448          |                     |            |            |            |             |  |
| <b>HES7</b>     | miR-99b-5p        | miR-423-5p          | miR-4532          |                     |            |            |            |             |  |
| <b>HK2</b>      | let-7c-5p         | miR-125a-5p         | miR-423-5p        | miR-1296-5p         |            |            |            |             |  |
| <b>JPH1</b>     | miR-423-5p        |                     |                   |                     |            |            |            |             |  |
| <b>KLHL17</b>   | miR-4532          |                     |                   |                     |            |            |            |             |  |
| <b>LCOR</b>     | let-7c-5p         | miR-125a-5p         | miR-30c-5p        | miR-152-3p          | miR-425-5p | miR-615-3p | miR-629-5p | miR-1296-5p |  |
| <b>LENG8</b>    | miR-152-3p        |                     |                   |                     |            |            |            |             |  |
| <b>LIN7C</b>    | miR-30c-5p        |                     |                   |                     |            |            |            |             |  |
| <b>LUC7L3</b>   | let-7c-5p         |                     |                   |                     |            |            |            |             |  |
| <b>LYPLA1</b>   | miR-23b-3p        | <b>miR-29c-3p</b>   | miR-126-5p        |                     |            |            |            |             |  |
| <b>MAFK</b>     | miR-423-5p        | miR-4532            |                   |                     |            |            |            |             |  |
| <b>MAK16</b>    | miR-23b-3p        |                     |                   |                     |            |            |            |             |  |
| <b>MAL2</b>     | miR-425-5p        | miR-3182            |                   |                     |            |            |            |             |  |
| <b>MAPK8IP3</b> | miR-423-5p        |                     |                   |                     |            |            |            |             |  |
| <b>MAT2A</b>    | miR-30c-5p        |                     |                   |                     |            |            |            |             |  |
| <b>MBNL2</b>    | miR-30c-5p        |                     |                   |                     |            |            |            |             |  |
| <b>MBP</b>      | <b>miR-574-3p</b> | <b>miR-1273g-3p</b> | miR-1296-5p       |                     |            |            |            |             |  |

Table S5B continued

## Increased mRNA in TEX-treated CD44v6kd cells

| mRNA            | miRNA               |                     |                     |                     |             |            |
|-----------------|---------------------|---------------------|---------------------|---------------------|-------------|------------|
| <b>MCOLN3</b>   | miR-132-3p          | miR-7641            |                     |                     |             |            |
| <b>MIB1</b>     | let-7c-5p           | miR-200b-5p         |                     |                     |             |            |
| <b>MTURN</b>    | let-7d-3p           | miR-28-3p           | <b>miR-29c-3p</b>   | miR-132-3p          | miR-181a-5p | miR-423-5p |
| <b>MXD1</b>     | let-7c-5p           | miR-152-3p          |                     |                     |             |            |
| <b>MXI1</b>     | <b>miR-29c-3p</b>   | miR-320a            |                     |                     |             |            |
| <b>MYC</b>      | let-7c-5p           | miR-629-5p          |                     |                     |             |            |
| <b>NAA16</b>    | miR-23b-3p          | miR-361-5p          |                     |                     |             |            |
| <b>NAA25</b>    | miR-152-3p          |                     |                     |                     |             |            |
| <b>NAMPT</b>    | miR-23b-3p          | miR-200b-5p         |                     |                     |             |            |
| <b>NCS1</b>     | miR-200b-5p         | miR-629-5p          | miR-4532            |                     |             |            |
| <b>NEK6</b>     | miR-10a-5p          | miR-23b-3p          |                     |                     |             |            |
| <b>NKTR</b>     | miR-10a-5p          | miR-1296-5p         |                     |                     |             |            |
| <b>ODC1</b>     | miR-423-5p          |                     |                     |                     |             |            |
| <b>OGT</b>      | miR-339-5p          |                     |                     |                     |             |            |
| <b>OTUD3</b>    | miR-132-3p          | <b>miR-1273g-3p</b> |                     |                     |             |            |
| <b>PABPC1L</b>  | miR-152-3p          |                     |                     |                     |             |            |
| <b>PAPD5</b>    | miR-10a-5p          | miR-181a-5p         | miR-200b-5p         | miR-320a            |             |            |
| <b>PAQR3</b>    | miR-200b-5p         |                     |                     |                     |             |            |
| <b>PARD6B</b>   | let-7c-5p           | miR-23b-3p          | <b>miR-1273g-3p</b> |                     |             |            |
| <b>PAWR</b>     | miR-30c-5p          | miR-181a-5p         |                     |                     |             |            |
| <b>PAXBPI</b>   | miR-23b-3p          |                     |                     |                     |             |            |
| <b>PIM1</b>     | miR-423-5p          |                     |                     |                     |             |            |
| <b>PIM3</b>     | miR-423-5p          | <b>miR-574-3p</b>   | miR-7641            |                     |             |            |
| <b>PMAIP1</b>   | let-7c-5p           | miR-23b-3p          | miR-181a-5p         | miR-200b-5p         |             |            |
| <b>PNISR</b>    | miR-181a-5p         |                     |                     |                     |             |            |
| <b>PNN</b>      | miR-126-5p          | miR-132-3p          |                     |                     |             |            |
| <b>PODXL</b>    | miR-99b-5p          | miR-125a-5p         | miR-615-3p          | <b>miR-1273g-3p</b> |             |            |
| <b>POLQ</b>     | let-7c-5p           |                     |                     |                     |             |            |
| <b>POLR3E</b>   | <b>miR-1273g-3p</b> |                     |                     |                     |             |            |
| <b>POLR3G</b>   | miR-23b-3p          | miR-30c-5p          | miR-361-5p          | miR-3184-3p         |             |            |
| <b>PPP3CA</b>   | let-7c-5p           | miR-30c-5p          | miR-99b-5p          |                     |             |            |
| <b>PPTC7</b>    | let-7c-5p           | miR-30c-5p          |                     |                     |             |            |
| <b>PRPF39</b>   | miR-3184-3p         |                     |                     |                     |             |            |
| <b>PRPS2</b>    | miR-200b-5p         |                     |                     |                     |             |            |
| <b>PSAT1</b>    | miR-200b-5p         |                     |                     |                     |             |            |
| <b>PTER</b>     | miR-200b-5p         | miR-3184-3p         |                     |                     |             |            |
| <b>PUS7</b>     | miR-126-5p          |                     |                     |                     |             |            |
| <b>RAB12</b>    | <b>miR-29c-3p</b>   | miR-152-3p          | miR-361-5p          | miR-3182            |             |            |
| <b>RABGGTB</b>  | miR-132-3p          |                     |                     |                     |             |            |
| <b>RICTOR</b>   | let-7c-5p           | miR-152-3p          | <b>miR-1273g-3p</b> | miR-4532            |             |            |
| <b>RIDA</b>     | miR-23b-3p          | miR-191-5p          | miR-7641            |                     |             |            |
| <b>RIMKLB</b>   | miR-200b-5p         |                     |                     |                     |             |            |
| <b>RPIA</b>     | miR-23b-3p          |                     |                     |                     |             |            |
| <b>RSRC2</b>    | miR-629-5p          |                     |                     |                     |             |            |
| <b>S100A2</b>   | miR-132-3p          |                     |                     |                     |             |            |
| <b>SASS6</b>    | miR-7641            |                     |                     |                     |             |            |
| <b>SCAMP1</b>   | miR-30c-5p          | miR-200b-5p         | miR-425-5p          | miR-3184-3p         |             |            |
| <b>SCML1</b>    | <b>miR-29c-3p</b>   | miR-30c-5p          |                     |                     |             |            |
| <b>SLC19A2</b>  | miR-181a-5p         | miR-3184-3p         |                     |                     |             |            |
| <b>SLC20A1</b>  | let-7c-5p           | miR-23b-3p          | miR-132-3p          | miR-3182            |             |            |
| <b>SLC25A36</b> | miR-23b-3p          |                     |                     |                     |             |            |
| <b>SLC25A37</b> | miR-181a-5p         |                     |                     |                     |             |            |
| <b>SLC35A3</b>  | miR-30c-5p          |                     |                     |                     |             |            |
| <b>SLC35F2</b>  | miR-425-5p          |                     |                     |                     |             |            |

Table S5B continued

## Increased mRNA in TEX-treated CD44v6kd cells

| mRNA    | miRNA        |              |              |              |            |            |             |
|---------|--------------|--------------|--------------|--------------|------------|------------|-------------|
| SLC4A7  | miR-30c-5p   |              |              |              |            |            |             |
| SLC7A11 | miR-30c-5p   |              |              |              |            |            |             |
| SLC7A2  | miR-10a-5p   | miR-425-5p   | miR-615-3p   |              |            |            |             |
| SMC5    | miR-28-3p    | miR-1273g-3p |              |              |            |            |             |
| SOWAHC  | miR-23b-3p   | miR-29c-3p   | miR-361-5p   | miR-629-5p   |            |            |             |
| SPNS2   | miR-4532     |              |              |              |            |            |             |
| STEAP2  | let-7c-5p    | miR-361-5p   | miR-1273g-3p | miR-1296-5p  |            |            |             |
| STK26   | miR-28-3p    | miR-320a     |              |              |            |            |             |
| SVIL    | miR-29c-3p   |              |              |              |            |            |             |
| TAF1D   | miR-152-3p   | miR-200b-5p  |              |              |            |            |             |
| TBC1D4  | miR-181a-5p  |              |              |              |            |            |             |
| TCEA1   | miR-7641     |              |              |              |            |            |             |
| TEX19   | miR-95-3p    | miR-125a-5p  | miR-339-5p   | miR-1273g-3p | miR-3182   |            |             |
| TIA1    | miR-30c-5p   |              |              |              |            |            |             |
| TMED7   | miR-23b-3p   | miR-30c-5p   | miR-152-3p   |              |            |            |             |
| TMEM168 | miR-10a-5p   | miR-125a-5p  |              |              |            |            |             |
| TRAF5   | miR-29c-3p   | miR-1273g-3p |              |              |            |            |             |
| TRMT11  | miR-10a-3p   |              |              |              |            |            |             |
| TRNT1   | miR-10a-5p   | miR-23b-3p   | miR-425-5p   |              |            |            |             |
| TRUB1   | miR-28-3p    |              |              |              |            |            |             |
| TTC14   | let-7c-5p    | miR-29c-3p   | miR-320a     |              |            |            |             |
| TXNRD1  | miR-23b-3p   | miR-1273g-3p | miR-4532     |              |            |            |             |
| UHRF2   | let-7c-5p    |              |              |              |            |            |             |
| VMP1    | miR-152-3p   |              |              |              |            |            |             |
| WDR19   | miR-152-3p   | miR-320a     |              |              |            |            |             |
| WDR43   | miR-1273g-3p |              |              |              |            |            |             |
| WNK2    | miR-423-5p   |              |              |              |            |            |             |
| XPOT    | miR-99b-3p   | miR-1273g-3p |              |              |            |            |             |
| XRCC2   | miR-200b-5p  | miR-1273g-3p |              |              |            |            |             |
| YOD1    | let-7c-5p    | miR-23b-3p   | miR-30c-5p   | miR-320a     | miR-361-5p | miR-99b-3p | miR-181a-5p |
| YRDC    | miR-29c-3p   |              |              |              |            |            |             |
| ZBTB10  | let-7c-5p    | miR-29c-3p   | miR-99b-3p   |              |            |            |             |
| ZBTB21  | miR-425-5p   |              |              |              |            |            |             |
| ZFAND1  | miR-30c-5p   | miR-361-5p   |              |              |            |            |             |
| ZNF267  | miR-23b-3p   | miR-200b-5p  |              |              |            |            |             |
| ZNF280C | miR-10a-5p   | miR-23b-3p   | miR-339-5p   |              |            |            |             |
| ZNF697  | let-7c-5p    | miR-28-3p    |              |              |            |            |             |
| ZNF92   | miR-23b-3p   | miR-200b-5p  |              |              |            |            |             |
| ZRANB2  | miR-30c-5p   | miR-320a     | miR-629-5p   |              |            |            |             |

<sup>a</sup> miRNA targeting the indicated mRNA are shown. miRNA reduced in CIC-TEX treated CD44v6kd and Tspan8kd cells: red, miRNA reduced in CIC-TEX treated Tspan8kd cells: blue, miRNA reduced in CIC-TEX treated CD44v6kd cells: green

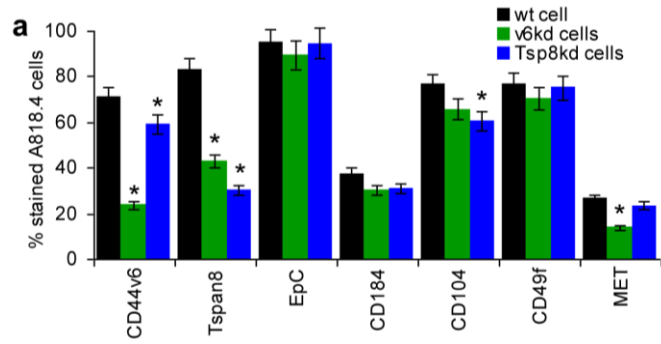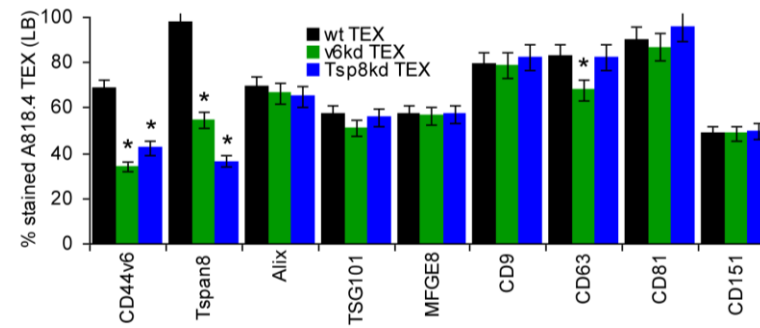

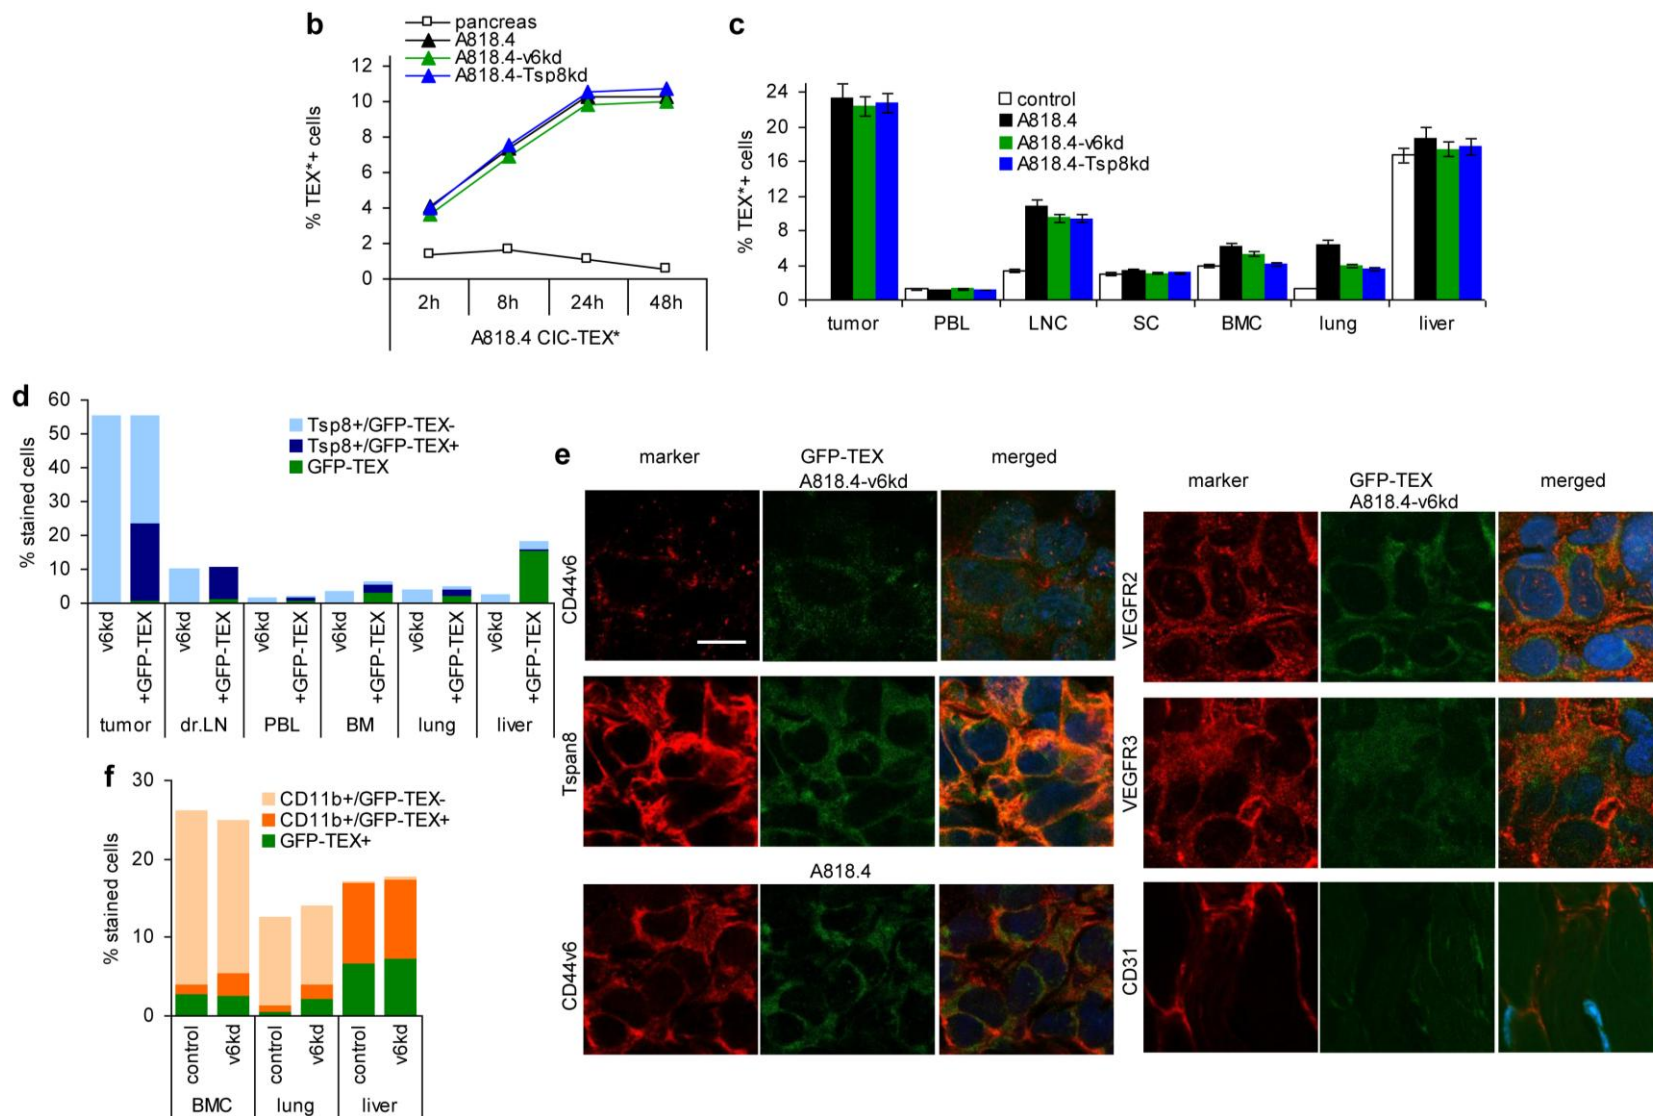

Figure S1 **TEX characterization and in vivo distribution of CIC-TEX**. (a) Flow-cytometry of A818.4, -v6kd and -Tsp8kd cells and LB-coated TEX were stained for the indicated CIC-markers and prominent Exo markers. The mean  $\pm$ SD of 3 assays are shown; significant differences between wt, v6kd and Tsp8kd cells and TEX: \*. (b-e) CIC-TEX were Dio-labeled or derived from GFP-transfected A818.4 cells. (b,c) Mice bearing intrapancreatic tumors received a single iv injection of Dio labeled TEX. (b) Uptake in the pancreas, A818.4, -v6kd and Tsp8kd tumors was evaluated by flow-cytometry after 2h-48h and (c) in the indicated organs 24h after TEX application; the mean % Dio-labeled cells  $\pm$ SD (3 mice/group) is shown. (d-f) Nude mice received a sc injection of tumor cells and weekly iv injections of CIC-TEX derived from GFP-transfected A818.4 cells (GFP-TEX). Mice were sacrificed, when the tumor reached a mean diameter of 0.5cm. (d,f) Flow-cytometry analysis of dispersed cells from the tumor and metastasis-prone organs stained with anti-GFP-FITC and anti-Tsp8-APC or anti-CD11b-APC; the mean % (3 mice/group) of single and double stained cells is shown; (e) confocal microscopy of shock-frozen tumor sections counterstained with the indicated antibody and Cy3-labeled secondary antibodies and DAPI; representative examples are shown; scale bar: 10 $\mu$ m. As described, a v6kd affects Tsp8 and MET expression, a Tsp8kd has a minor impact on v6 and CD104 expression. With the exception of slightly reduced CD63 expression in v6kd TEX, the v6kd and the Tsp8kd do not affect TEX marker expression. TEX are preferentially taken up by the tumor and in the liver. In the tumor, draining LN, lung and PB mostly tumor cells take-up TEX; in the BM and most pronounced in the liver CIC-TEX are also taken-up by M $\square$ . There was no difference in the uptake between wt and v6kd or Tsp8kd cells.

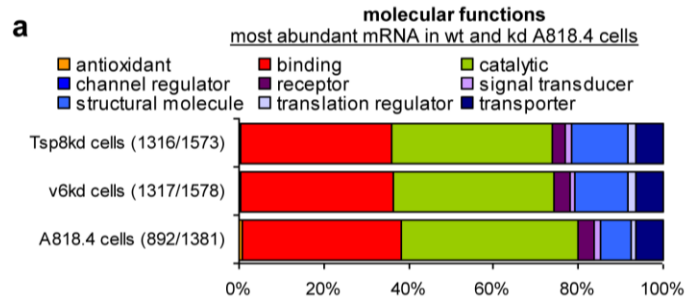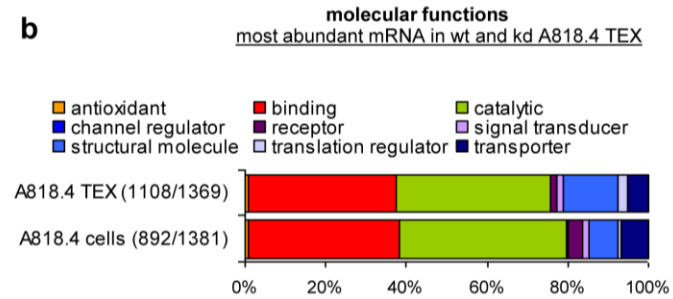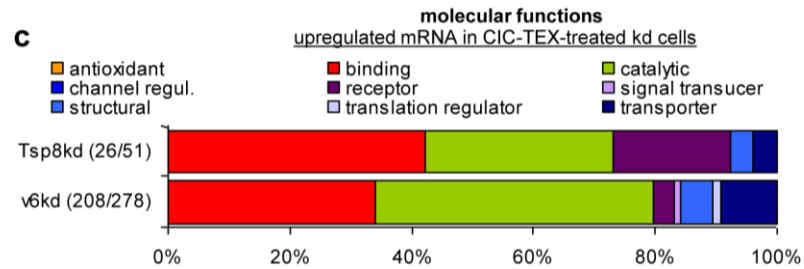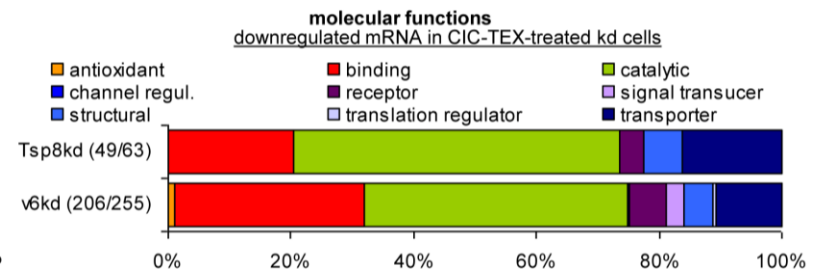

d

reduced mRNA recovery in TEX-treated Tspan8kd and CD44v6kd cells

transcription/ translation

BTG2  
GATA2  
GATA2-AS1  
HOXB8  
LMO4  
MEIS2  
WVVOX  
ZNF704  
ARID5A  
BHLHE40  
CCDC69  
CDK5  
CDKN1A  
CDKN2C  
CDX2  
CREB3L4  
HOXA11  
HOXB7  
HOXB8  
INTS5  
MYCL  
NFATC4  
NFE2  
PARP10  
PARP9  
PBXIP1  
POLR1D  
SP5  
SREBF1  
SRFEB2  
STAT1  
STAT2  
TDGF1  
TEF  
TGFB1/1  
TP53INP2  
TRIM29  
VDR  
WBP2  
ZBTB7C  
ZNF831

transport/drug transport

ABCG2  
AQP3  
ATP6V1B1  
AZGP1  
CACNA1D  
GABRP  
NOX1  
SLC35D1  
SLC38A11  
SLC40A1  
SLC4A4  
ANXA6  
APOE  
ARHGAP18  
ATP6V0D1  
ATP6V0E2  
CALHM3  
CDK5  
CDX2  
CHRNA3  
CHRNB1  
CPNE2  
CRAT  
CTSZ  
DBH  
DBI  
DYSF  
EBP  
FXVD6  
GJB1  
GLUL  
GPR155  
GRM8  
KCNJ5  
MCTP1  
MX1  
MX2  
MYO1D  
NEURL1B  
NGFR  
NPC2  
ORAI3  
PCSK9  
PLIN3  
PSMB9  
RAB15  
REEP2  
SCNN1A  
SEC14L2  
SLC12A4  
SLC1A4  
SLC25A1  
SLC2A6  
SLC4A8  
SLC5A1  
SLC7A8  
SORT1  
STARD3  
STARD4  
SV2A  
TAP1  
TBC1D17  
VAM8  
VDAC3  
VDR  
VPS18

oncogenesis

BCAS1  
PARM1  
ST5

angiogenesis

CEACAM1  
GATA2  
TGM2  
THBS1  
AMOT  
CEACAM1  
CHI3L1  
CXCR4  
SYK

apoptosis

HPGD  
IFIT2  
IFIT3  
RARRES1  
THBS1  
WVVOX  
ANXA6  
AXIN2  
BCL2L15  
CDKN1A  
CHI3L1  
CST3  
DDAH2  
DHCR24  
DNASE1  
HYAL2  
IFI6  
IFIT3  
NGFR  
PCSK9  
PIK3R3  
PLSCR1  
PPARD  
PRDX2  
SFN  
STAT1  
TNFRSF19  
TRIM69

structure/ECM/proteolysis

CEACAM1  
CLEC3A  
ERMP1  
FGG3  
LMO4  
PRCKLE4  
PRSS23  
RHBDL2  
SHROOM1  
ACP2  
ADAMTS8  
ADAMTSL2  
APOE  
ARHGAP18  
BTBD6  
CCDC69  
CDK5  
CST1  
CST3  
CTSZ  
FBOX2  
GMFG  
KAZALD1  
MYHB7  
MYL6  
NEDD9  
OBSL1  
PRKCBDBP  
SPTB  
SYNE1  
TIMP1  
TNFRSF11B  
TUBA1A1

signaling/EMT signaling

ARL15  
ATP6V1B1  
CACNA1D  
DDX60  
F2R  
FGD3  
GATA2  
GBP2  
HPGD  
IFIT2  
IFIT3  
NOX1  
OASL  
RASL11A  
RGS2  
TGM2  
WVVOX  
AMOT  
APCDD1  
APOE  
ARHGAP1  
ARHGAP18  
ARHGEF40  
ATP6V0D1  
ATP6V0E2  
AXIN2  
BAMBI  
BST2  
CCDC3  
CDK5  
CDKN1A  
CDKN2C  
CEACAM1  
CHI3L1  
CXCR4  
DDAH2  
DDX58  
DDX60  
DKK4  
FBXW4  
GPA  
GPR155  
GRM8  
HMGCR  
HUNK  
IFI6  
IFIH1  
IFIT1  
IFIT3  
IFITM3  
IL17RD  
ISG15  
KLK1  
LSS  
MVK  
MX1  
MX2  
MYL6  
NEDD9  
NEURL1B  
NGFR  
NKD1  
NOTUM  
OAS1  
OAS2  
OAS3  
PARP10  
PARP9  
PIK3R3  
PRKCDBP  
PRRL5  
PSMB9  
RAB15  
RAB42  
RASL11B  
S100A13  
SAMHD1  
SFN  
SPTB  
ST5  
STARD13  
STAT1  
STAT2  
SYK  
TAS1R3  
TBC1D17  
TDGF1  
TGFB1/1  
TNFRSF11b  
TNFRSF19  
TRDC  
TRIM21  
TRIM29  
TUBA1A1  
UBE2L6  
VDR  
VEGFB  
WBP2  
WNT6

blue: Tsp8kd cells, violet: v6kd cells  
red: function according to heading  
underlined: repeatedly presented

List of synonyms: Table S1



**e**

**increased mRNA recovery in TEX-treated Tspan8kd and CD44v6kd cells**

| transcription/ translation/splicing |                |               | transport/drug transport | oncogenesis   | angiogenesis | apoptosis     | structure/ECM/proteolysis | signaling/EMT signaling |
|-------------------------------------|----------------|---------------|--------------------------|---------------|--------------|---------------|---------------------------|-------------------------|
| <u>Caprin2</u>                      | <u>ABCE1</u>   | PABPC1L       | <u>LCN2</u>              | ABCA3         | EMP1         | <u>CHAC1</u>  | ADAM19                    | AKAP12                  |
| <u>DDIT3</u>                        | AKNA           | PAPD5         | SLCO4A1                  | ABCC3         | <u>DDIT3</u> | <u>DDIT4</u>  | CEACAM6                   | <u>CAPRIN2</u>          |
| <u>FAM129A</u>                      | BAZ1A          | PAXBP1        |                          | ABCC4         | <u>EREG</u>  | <u>EGR1</u>   | COL17A1                   | <u>CHAC1</u>            |
| <u>HMGA1</u>                        | BDP1           | PNN           |                          | <u>ABCE1</u>  | <u>ID1</u>   | <u>H1F0</u>   | COL17A1                   | <u>DCBLD2</u>           |
| <u>ID1</u>                          | BMI1           | POLR3E        |                          | ANO1          | <u>JAG1</u>  | <u>ID1</u>    | LAMA3                     | <u>DDIT3</u>            |
| <u>NDRG1</u>                        | BTAF1          | POLR3G        |                          | ATP11A        | <u>NRP1</u>  | <u>IFI27</u>  | LAMC2                     | <u>DDIT4</u>            |
| <u>PER1</u>                         | C6orf48        | PRPF39        |                          | ATP13A3       |              | <u>IFI6</u>   | NEBL                      | <u>DKK1</u>             |
|                                     | <u>CAPRIN2</u> | PUM3          |                          | CEP290        |              | <u>JAG1</u>   | AGTPBP1                   | <u>DUSP5</u>            |
|                                     | <u>CCNL1</u>   | PUS7          |                          | CHML          |              | <u>LCN2</u>   | AP1AR                     | <u>EGR1</u>             |
|                                     | <u>CCNT2</u>   | RBM26         |                          | FHL1          |              | <u>NTR1</u>   | BRWD1                     | <u>EREG</u>             |
|                                     | <u>CEBPG</u>   | <u>RBM39</u>  |                          | <u>GAL</u>    |              |               | <u>CDC42EP1</u>           | <u>ERRF1</u>            |
|                                     | <u>CLK1</u>    | RIDA          |                          | <u>GOLT1B</u> |              |               | <u>CSNK1A1</u>            | <u>ID1</u>              |
|                                     | CREBZF         | RIF1          |                          | DUS4L         |              | ATF3          | DNAH14                    | <u>IFI27</u>            |
|                                     | <u>DDIT3</u>   | RPL32P3       |                          | FHL1          |              | CEACAM5       | <u>DST</u>                | <u>IFI6</u>             |
|                                     | <u>DDX21</u>   | SCML1         |                          | <u>GAL</u>    |              | CLDND1        | <u>DVL1</u>               | <u>IFI6</u>             |
|                                     | <u>DICER1</u>  | TAF1D         |                          | <u>GOLT1B</u> |              | <u>DICER1</u> | <u>FMNL2</u>              | <u>IGFBP6</u>           |
|                                     | EIF1AX         | TCEA1         |                          | GPD1L         |              | <u>GAL</u>    | <u>HSPA1A/1B</u>          | <u>JAG1</u>             |
|                                     | EIF3J          | TFAP4         |                          | <u>HMGA1</u>  |              | GCLM          | KLHL17                    | <u>NRP1</u>             |
|                                     | <u>EIF4A2</u>  | <u>TRMT11</u> |                          | JPH1          |              | INHBE         | LAMB3                     | <u>NTR1</u>             |
|                                     | ESF1           | TRNT1         |                          | LIN7C         |              | NEA1          | MAL2                      | <u>PER1</u>             |
|                                     | <u>FAM129A</u> | TRUB1         |                          | LYPLA1        |              | NEK6          | MBP                       | <u>PMEPA1</u>           |
|                                     | FOXN2          | <u>U2SURP</u> |                          | MAPK8IP3      |              | OGT           | PARD6B                    | <u>PSD3</u>             |
|                                     | GAS5           | WDR36         |                          | MCOLN3        |              | PAWR          | PKD1                      | <u>SCEL</u>             |
|                                     | <u>GEMIN5</u>  | WDR43         |                          | MT-ND5        |              | PHLDA2        | PLAUR                     |                         |
|                                     | <u>GTF2F2</u>  | ZBTB10        |                          | NCS1          |              | PIM1          | PVR                       |                         |
|                                     | HES7           | ZBTB21        |                          | <u>PPP3CA</u> |              | PIM3          | RICTOR                    |                         |
|                                     | <u>HMGA1</u>   | ZFAS1         |                          | SAT1          |              | <u>PMAIP1</u> | SASS6                     |                         |
|                                     | KCNQ1OT1       | ZMYM1         |                          | SCAMP1        |              | RABGGT8       | SVIL                      |                         |
|                                     | LCOR           | ZNF121        |                          | SLC19A2       |              | <u>STK26</u>  | VMP1                      |                         |
|                                     | <u>LUC7L3</u>  | ZNF146        |                          | SLC20A1       |              | <u>TIA1</u>   |                           |                         |
|                                     | MAFK           | ZNF267        |                          | SLC25A36      |              | <u>TRAF5</u>  |                           |                         |
|                                     | MAK16          | ZNF280C       |                          | SCL25A37      |              |               |                           |                         |
|                                     | MALAT1         | ZNF518A       |                          | SLC35A3       |              |               |                           |                         |
|                                     | <u>MBNL2</u>   | ZNF697        |                          | SLC35F2       |              |               |                           |                         |
|                                     | MDN1           | ZNF770        |                          | SLC4A7        |              |               |                           |                         |
|                                     | MRPL12         | TNF92         |                          | SLC7A11       |              |               |                           |                         |
|                                     | MXD1           | ZRANB2        |                          | SCL7A2        |              |               |                           |                         |
|                                     | MXI1           |               |                          | SPNS2         |              |               |                           |                         |
|                                     | NFXL1          |               |                          | STEAP2        |              |               |                           |                         |
|                                     | NMD3           |               |                          | TBC1D4        |              |               |                           |                         |
|                                     | NOP58          |               |                          | TMED7         |              |               |                           |                         |
|                                     | <u>NR1D1</u>   |               |                          | TXRND1        |              |               |                           |                         |
|                                     | OGT            |               |                          | VPS13A        |              |               |                           |                         |
|                                     |                |               |                          | WNK2          |              |               |                           |                         |
|                                     |                |               |                          | XPOT          |              |               |                           |                         |
|                                     |                |               |                          | YRDC          |              |               |                           |                         |

Legend:  
 blue: Tsp8kd cells, violet: v6kd cells  
 red: function according to heading  
 underlined: repeatedly presented

List of synonyms: Table S1

Figure S2 Differences in the mRNA profile of A818.4, -CD44v6kd and -Tspan8kd cells and TEX and the impact of CIC-TEX on CD44v6kd and Tspan8kd cells. (a-c) mRNA of A818.4, -v6kd and -Tsp8kd cells and TEX and of CIC-TEX-treated (72h) v6kd and Tsp8kd cells were analyzed by DS. After normalization data were evaluated (a,b) for molecular functions of most abundant (signal strength  $\geq 5000$ ) mRNA in wt versus kd cells and wt cells versus TEX, (c) mRNA (signal strength  $\geq 1000$ )  $\geq 2$ -fold up- or downregulated by CIC-TEX coculture of kd cells. (d,e) Combined Panther pathway and Reactome analysis of mRNA (signal strength  $\geq 1000$ ) that differed  $\geq 2$ -fold between kd cells and CIC-TEX-treated kd cells according to the indicated groups (differences in Tsp8kd cells: blue, in v6kd cells: violet; genes that are repeatedly mentioned in distinct groups are underlined) (List of synonyms: Table S1).

TEX coculture-induced differences in the mRNA profile are more frequent in v6kd than Tsp8kd cells; genes engaged in transcription/translation, transport and signaling are most abundantly affected.

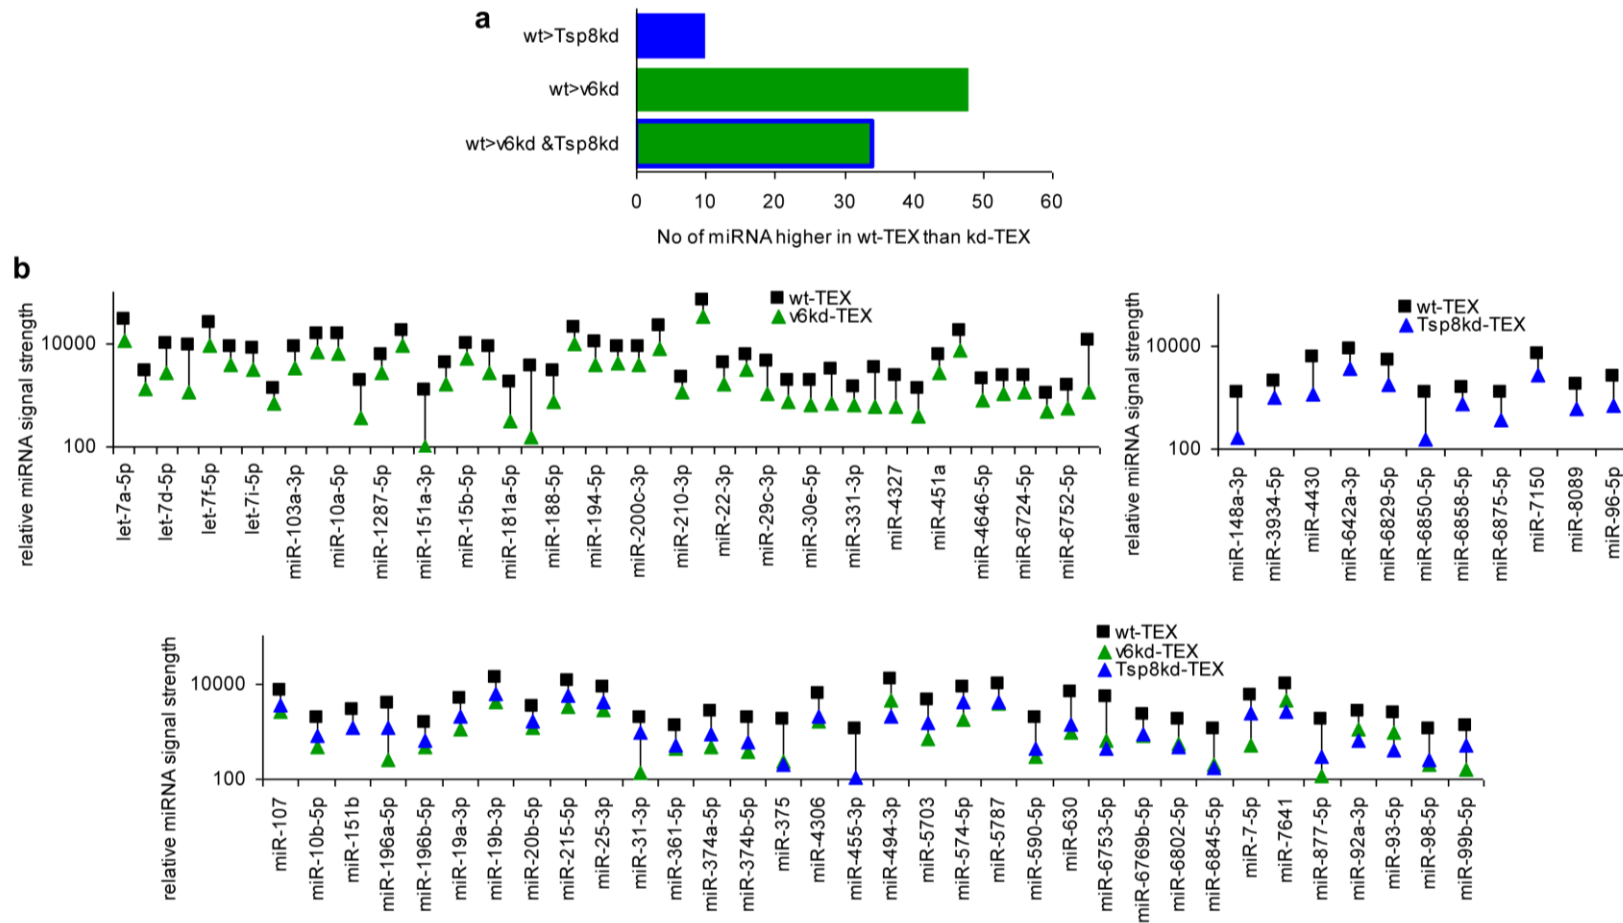

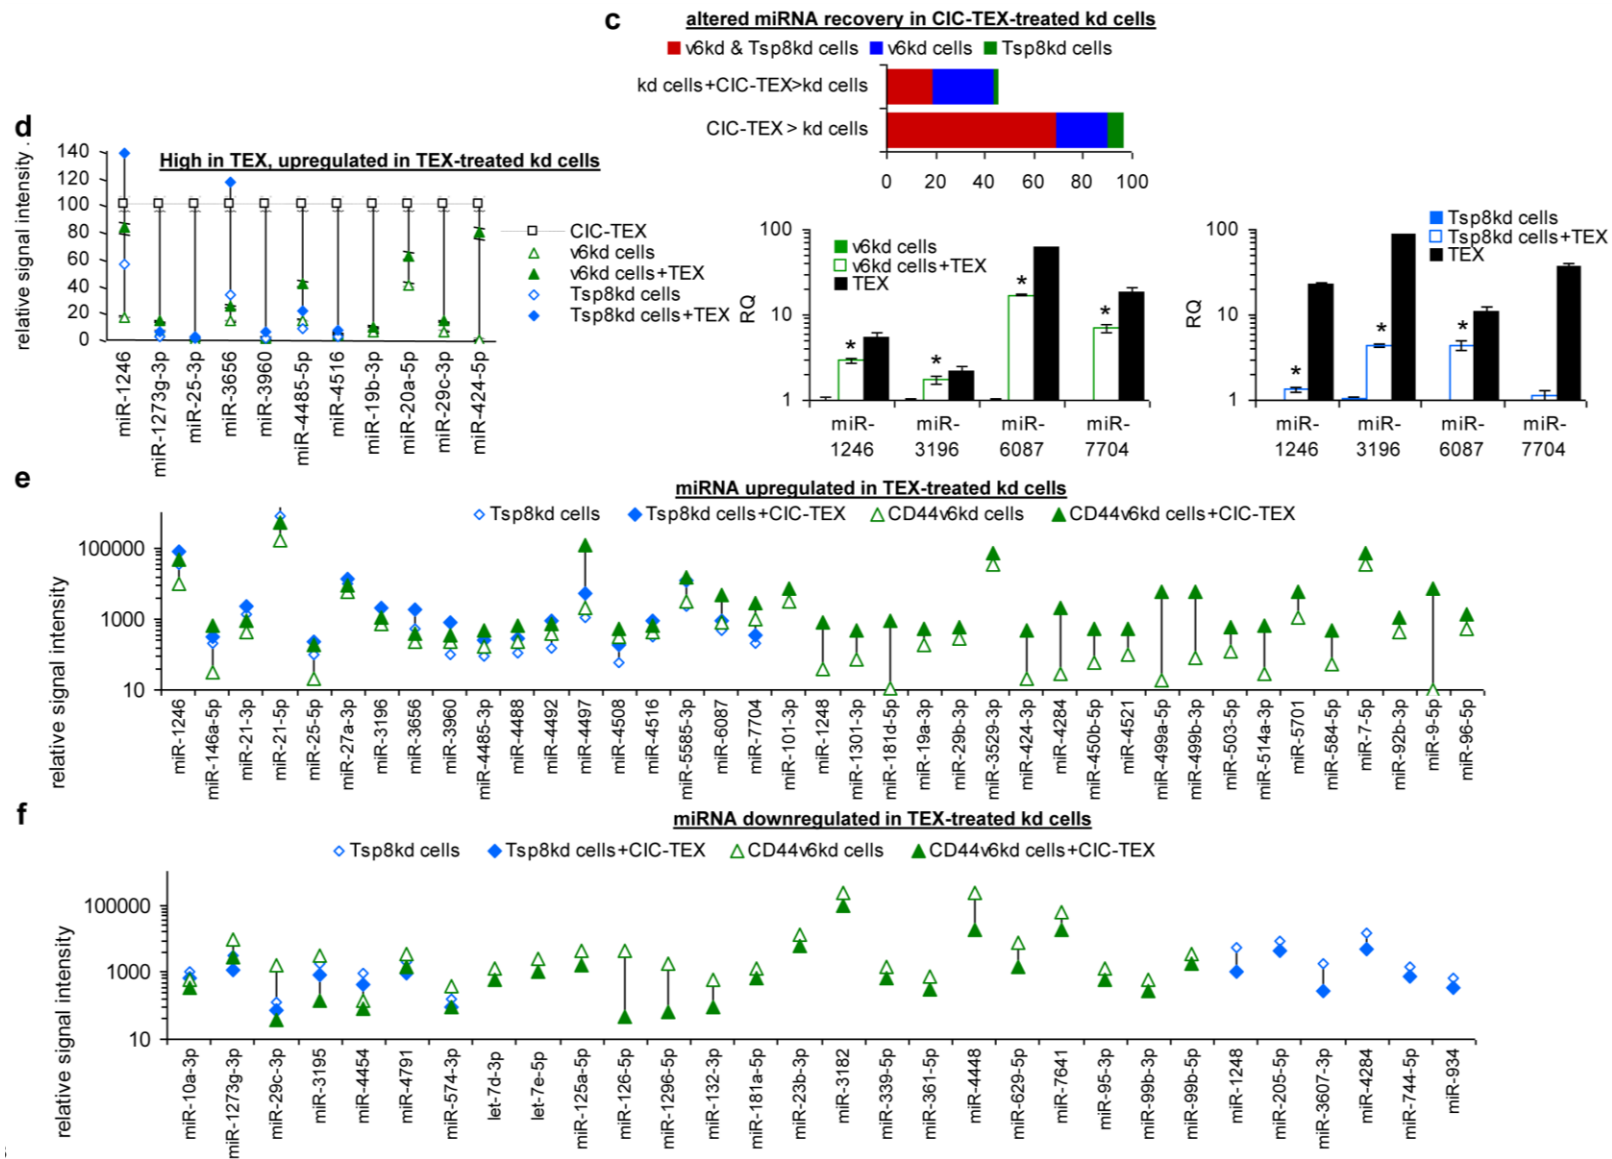

Figure S3 Distinct miRNA recovery in wt-TEX versus CD44v6kd and Tspan8kd TEX and in kd cells cocultured with CIC-TEX. (a,b) Recovery of miRNA (signal strength in wt TEX  $\geq 1000$ ) that expression is  $\geq 2$ -fold reduced in v6kd and/or Tsp8kd TEX. (c-f) miRNA of CIC-TEX, v6kd and Tsp8kd cells and kd cells cocultured with CIC-TEX was evaluated by DS. After normalization miRNA with a signal strength  $\geq 500$  were analyzed for (c) significant differences ( $\geq 1.5$ -fold) in the signal strength between CIC-TEX and kd cells and between kd cells versus CIC-TEX-treated kd cells; (d) miRNA recovered at an  $\geq 1.5$ -fold lower level in kd cells than CIC-TEX (values normalized to 100) and being  $\geq 1.5$ -fold increased after coculture with CIC-TEX, which was confirmed by qRT-PCR for selected examples, showing RQ values for kd cells, CIC-TEX-treated kd cells and CIC-TEX; RQ values  $\pm$ SD (triplicates) are shown, significant increase in kd cells by coculture with CIC-TEX: \*; (e,f)  $\geq 1.5$ -fold increased or decreased miRNA recovery in CIC-TEX-treated v6kd and/or Tsp8kd cells compared to untreated kd cells (independent of the signal strength in CIC-TEX).

The miRNA profile of wt TEX differs from that of kd, particularly v6kd TEX, most prominent being the loss in let7 miRNA in v6kd TEX. CIC-TEX miRNA also strongly differs from that of kd cells. Coculture with CIC-TEX alters the miRNA profile of the kd, mostly v6kd cells. However, despite recovery of CIC-TEX miRNA in kd cells, coculture-induced changes rarely are related to the CIC-TEX miRNA content.

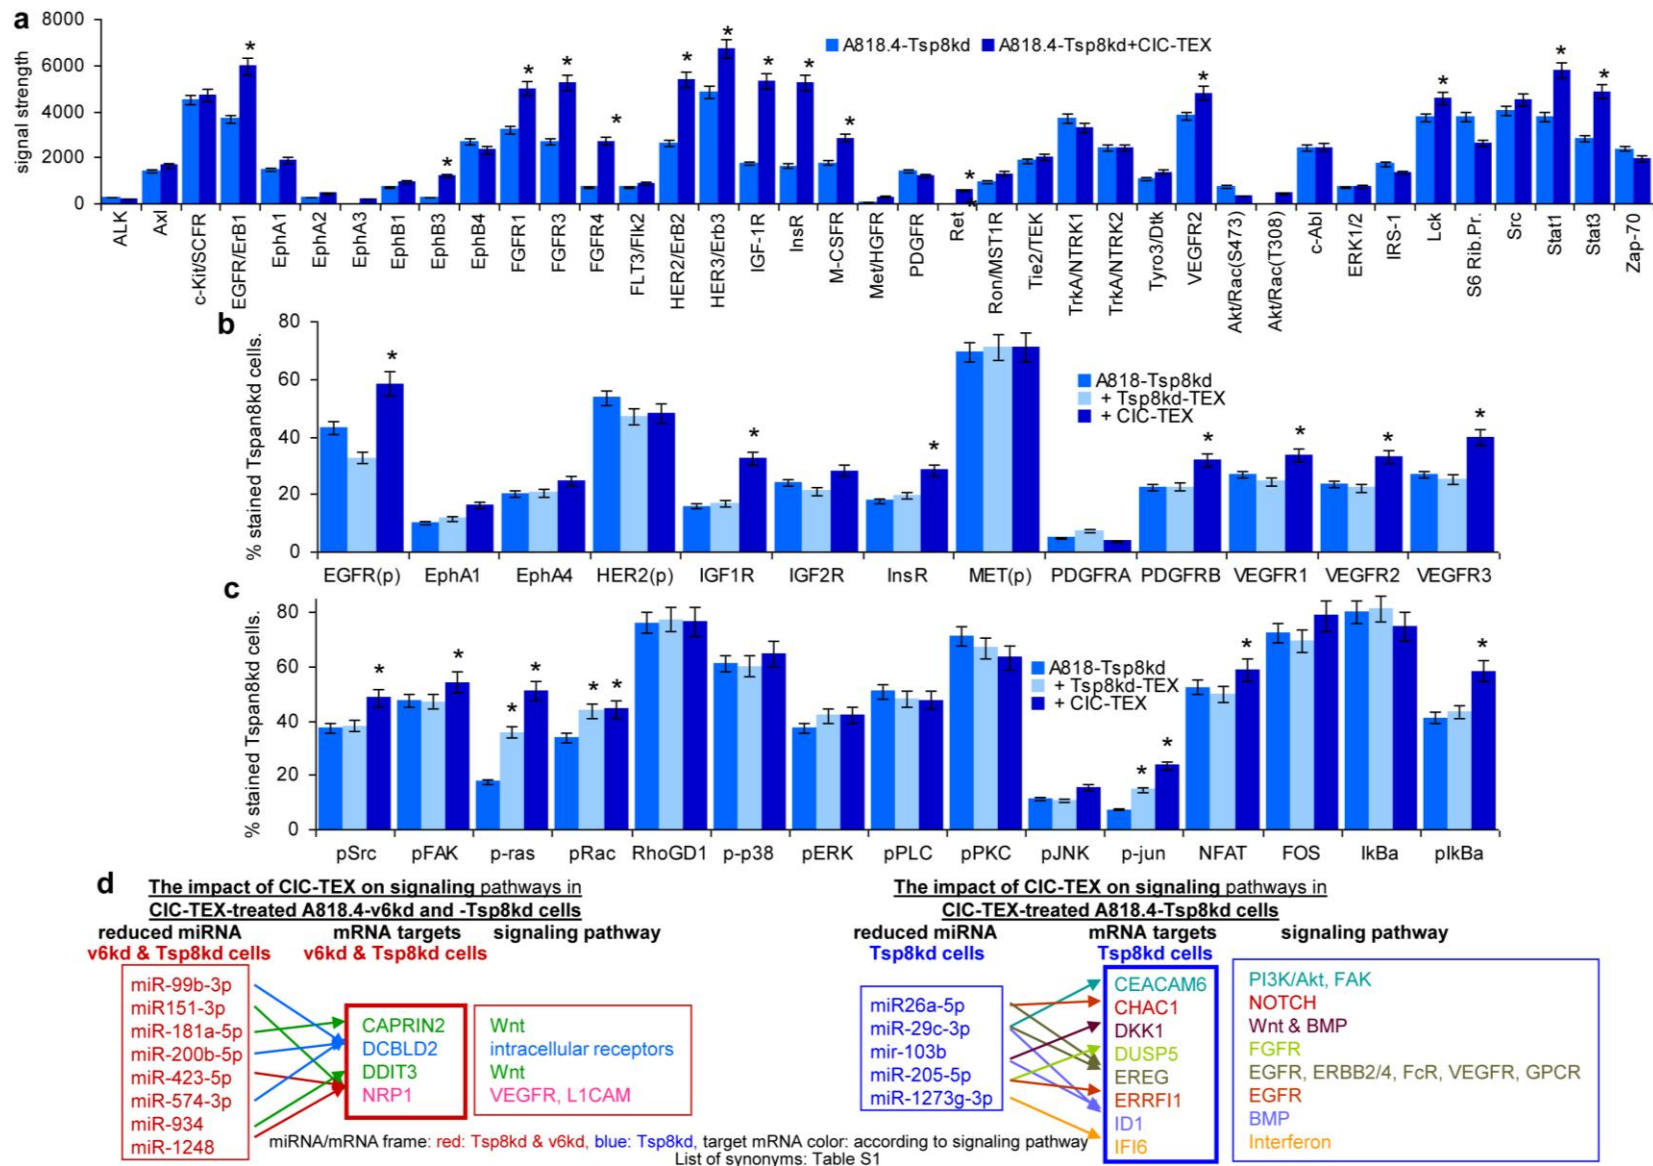

Figure S4 **CIC-TEX-initiated changes in RTK and downstream signaling molecules in Tspan8kd cells and mRNA release from repression by reduced miRNA expression in CD44v6kd and/or Tsp8kd cells.** (a) Signaling array of A818.4-Tsp8kd cells cultured for 72h with/without CIC-TEX. The relative signal strength was evaluated by ImageJ; significant differences by coculture with CIC-TEX: \*. Flow-cytometry of (b) RTK expression and (c) major pathway-engaged cytosolic signaling molecules in Tsp8kd cells and Tsp8kd-TEX- or CIC-TEX-treated Tsp8kd cells; (b,c) mean % stained cells $\pm$ SD (3 assays), significant differences by coculture with TEX: \*; (d) IPA-based STRING analysis after predicted target mRNA selection by [microrna.org](http://microrna.org) and [targetscan.org](http://targetscan.org) for  $\geq 2$ -fold reduced miRNA in CIC-TEX-treated compared to untreated v6kd and/or Tsp8kd cells and of  $\geq 2$ -fold upregulated predicted mRNA targets, that are engaged in signal transduction. (List of synonyms: Table S1). The signaling array and flow-cytometry analysis of TEX-treated Tsp8ko cells confirms the striking impact of CIC-TEX on promoting signaling cascade activation. The analysis of inversely correlating miRNA and predicted mRNA in CIC-TEX-treated v6kd and/or Tsp8kd cells backs the potential engagement of regulated miRNA expression on mRNA recovery.



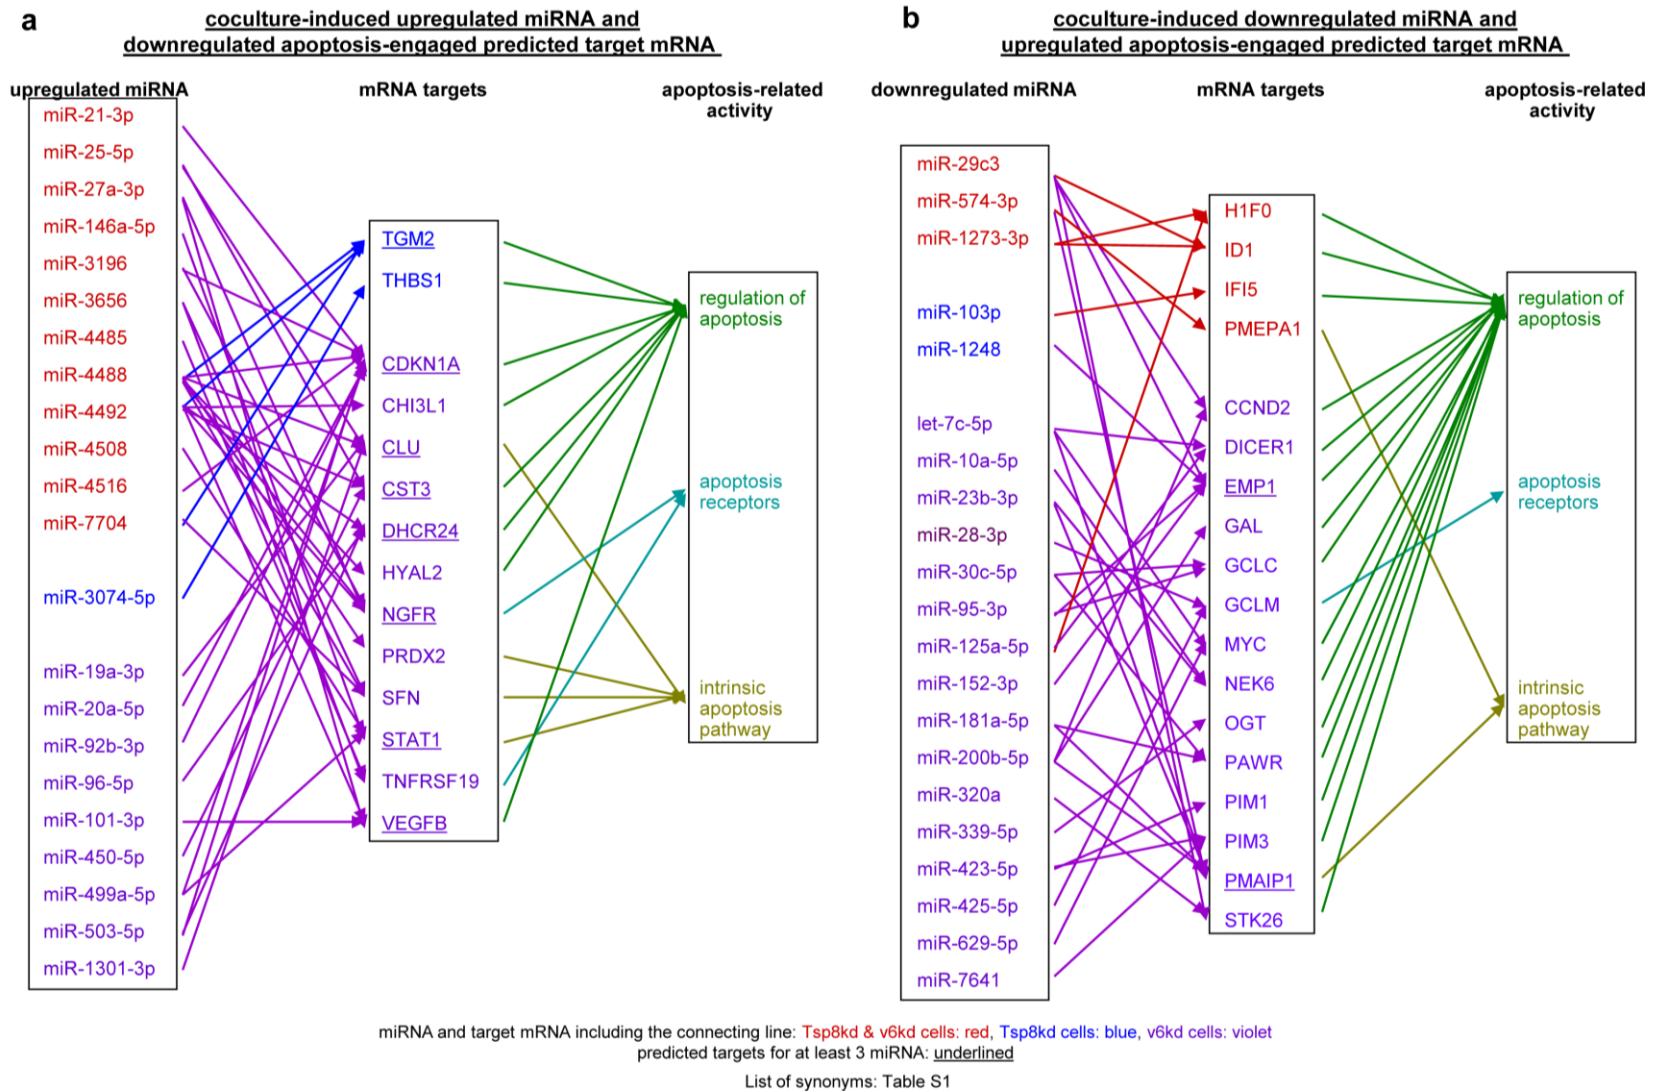

Figure S5 **CIC-TEX-promoted changed miRNA recovery and predicted target mRNA engaged in apoptosis**. List of miRNA that expression was expression was  $\geq 2$ -fold higher (a) or lower (b) in CIC-TEX treated than untreated v6kd and/or Tspan8kd cells (v6kd and Tsp8kd cells: red, Tsp8kd cells: blue, v6kd cells: violet). After selection of predicted target mRNA by [microrna.org](http://microrna.org) and [targetscan.org](http://targetscan.org) that expression was inversely to miRNA  $\geq 2$ -fold altered after CIC-TEX coculture, mRNA engagement in apoptosis-related processes was evaluated by IPA-based STRING analysis. (List of synonyms: Table S1). CIC-TEX coculture-promoted changes in apoptosis-related miRNA are most pronounced in v6kd cells. This also accounts for predicted target mRNA that expression inversely correlated with miRNA up- or downregulation. Predicted target mRNA mostly is engaged in regulation of apoptosis. In addition, several predicted mRNA are only targets for 1 or 2 miRNA.
